# Supplementary material for: Prevalence, risk factors and outcome of congenital anomalies among neonatal admissions in OGBOMOSO, Nigeria
Source: BMC Pediatr. 2019 Apr 3;19:88. doi: 10.1186/s12887-019-1471-1 (PMC6446329; doi:10.1186/s12887-019-1471-1)
Supplement: Supplementary file 1 — Spreadsheet of study data in excel format. (XLS 1146 kb) [file 12887_2019_1471_MOESM1_ESM.xls]

## Sheet: finalCAproject
sn	sex	age	gest_age	year	placeofbirth	weight	b_order	type_gest	mode_del	diagnosis	birthasph	deliv_superv	cong_anom	type_congenital	pren_diag	ass_condstr	mat_age	place_dom	mat_occ	mat_rel	mat_tribe	parity	anc	alcohol	smoke	folicacid	medik	chronic_illness	herbs	febrile	marital	uss	hospstay	status	mode_exit	age_death	sixmonths	maj_anom	weight_recode	gest_age_categoric	age_recode	birth_ordrecode	mat_agerecode	tribe_recode	parity_recode	anc_recoded	folicacid_recoded	fa_recode2	mode1
1	0	0	33	1	0	2	4	1	0	7	2	0	1	polydactyly all limbs	0		#NULL!	1		1	0	4	4	#NULL!	#NULL!	#NULL!	0	0	0	0	1	0	7	0	1	#NULL!	#NULL!	0	2	#NULL!	0	4	#NULL!	0	4	0	2	1	0
2	0	0	29	1	0	1.4	3	1	0	1	2	0	0		0	diarrhoea	#NULL!	1		0	0	3	4	0	#NULL!	#NULL!	0	0	0	1	1	1	19	1	1	19	#NULL!	0	1	1	0	4	#NULL!	0	4	1	#NULL!	#NULL!	1
3	1	3	99	1	1	3	3	1	0	8	#NULL!	0	0		0	sepsis	#NULL!	1		0	0	3	2	#NULL!	#NULL!	2	1	#NULL!	#NULL!	0	1	#NULL!	6	0	1	#NULL!	0	0	3	1	0	3	#NULL!	0	3	1	#NULL!	#NULL!	1
4	0	0	34	1	0	1.7	1	1	0	1	0	0	0		0	nnj	#NULL!	1		0	0	1	4	0	0	#NULL!	0	0	#NULL!	#NULL!	1	1	8	0	1	#NULL!	0	0	2	0	0	3	#NULL!	0	3	1	1	0	1
5	0	2	#NULL!	1	1	2.3	4	1	0	4	3	0	0		0		#NULL!	1		1	#NULL!	4	4	0	#NULL!	#NULL!	0	0	0	0	1	1	11	0	1	#NULL!	#NULL!	0	2	1	0	1	#NULL!	0	1	1	#NULL!	#NULL!	1
6	1	0	99	1	1	3.26	1	1	0	3	3	0	0		0		#NULL!	2		1	0	1	1	0	0	#NULL!	0	0	0	0	1	1	9	0	1	#NULL!	#NULL!	0	3	#NULL!	0	4	#NULL!	#NULL!	4	1	#NULL!	#NULL!	1
7	0	0	32	1	0	1.6	3	1	0	1	0	0	0		0	sepsis and nnj	#NULL!	2		0	0	3	0	#NULL!	#NULL!	#NULL!	#NULL!	0	#NULL!	0	1	1	12	0	1	#NULL!	0	0	2	0	0	1	#NULL!	0	1	1	#NULL!	#NULL!	1
8	0	7	#NULL!	1	1	2	#NULL!	1	0	4	#NULL!	#NULL!	0		0		#NULL!	1		1	#NULL!	#NULL!	#NULL!	#NULL!	#NULL!	#NULL!	#NULL!	#NULL!	#NULL!	#NULL!	#NULL!	1	1	0	2	#NULL!	#NULL!	0	2	1	0	3	#NULL!	0	3	0	#NULL!	#NULL!	1
9	1	0	34	1	0	1.5	1	1	0	7	2	0	1	VSD	0	nnj	#NULL!	2		0	1	1	4	#NULL!	#NULL!	#NULL!	#NULL!	0	#NULL!	0	1	1	17	0	1	#NULL!	1	1	1	0	0	#NULL!	3	0	2	0	0	0	1
10	1	0	#NULL!	1	1	3.2	3	1	0	3	2	0	0		0		#NULL!	2	trading	0	1	3	3	0	0	#NULL!	0	0	0	0	1	1	9	0	1	#NULL!	0	0	3	#NULL!	0	#NULL!	#NULL!	#NULL!	#NULL!	#NULL!	#NULL!	#NULL!	0
11	1	0	99	1	0	2.9	#NULL!	1	2	5	2	0	0		0	nnj	#NULL!	1		#NULL!	0	#NULL!	2	#NULL!	#NULL!	#NULL!	1	#NULL!	#NULL!	0	1	#NULL!	6	0	1	#NULL!	#NULL!	0	3	1	0	1	#NULL!	1	1	1	#NULL!	#NULL!	1
12	1	4	99	1	0	3.3	2	#NULL!	0	2	0	0	0		0		#NULL!	1		0	0	2	4	#NULL!	#NULL!	#NULL!	#NULL!	#NULL!	#NULL!	0	1	1	2	0	2	#NULL!	#NULL!	0	3	#NULL!	0	3	#NULL!	1	3	1	#NULL!	#NULL!	1
13	1	0	31	1	1	1.58	1	2	0	1	0	0	0		0	nnj	#NULL!	1		0	0	1	#NULL!	#NULL!	#NULL!	#NULL!	#NULL!	0	0	0	1	1	22	0	1	#NULL!	0	0	2	0	0	#NULL!	#NULL!	0	#NULL!	1	#NULL!	#NULL!	1
14	1	0	31	1	1	1.4	2	2	0	7	0	0	1	undescended testes	0		#NULL!	1		0	1	1	#NULL!	#NULL!	#NULL!	#NULL!	#NULL!	0	0	0	1	1	22	0	1	#NULL!	#NULL!	0	1	0	0	#NULL!	3	0	3	1	1	0	1
15	1	0	32	1	0	1.6	1	#NULL!	0	1	2	0	0		0	nnj	#NULL!	2		0	0	1	0	#NULL!	#NULL!	#NULL!	#NULL!	#NULL!	#NULL!	#NULL!	1	#NULL!	17	0	1	#NULL!	#NULL!	0	2	0	0	2	#NULL!	0	2	1	#NULL!	#NULL!	0
16	0	6	99	1	0	2.42	2	1	2	2	0	0	0		0		#NULL!	1		0	0	2	4	#NULL!	#NULL!	#NULL!	#NULL!	#NULL!	#NULL!	0	1	1	4	0	1	#NULL!	0	0	2	1	0	1	#NULL!	0	1	#NULL!	#NULL!	#NULL!	1
17	1	2	99	1	1	3.7	1	1	0	3	3	0	0		#NULL!	sepsis	#NULL!	1		1	0	1	2	#NULL!	#NULL!	#NULL!	#NULL!	#NULL!	#NULL!	0	1	1	12	0	1	#NULL!	0	0	3	1	0	2	#NULL!	1	1	#NULL!	#NULL!	#NULL!	1
18	1	0	27	1	0	1.26	2	2	0	1	0	#NULL!	0		0		#NULL!	1		0	0	1	0	#NULL!	#NULL!	#NULL!	#NULL!	#NULL!	#NULL!	0	#NULL!	#NULL!	37	0	1	#NULL!	0	0	1	1	0	1	#NULL!	0	1	0	#NULL!	#NULL!	1
19	1	2	99	1	0	2.748	2	1	2	4	0	0	0		0		#NULL!	1		0	0	2	#NULL!	#NULL!	#NULL!	#NULL!	0	0	0	0	1	#NULL!	4	0	1	#NULL!	#NULL!	0	3	0	0	2	#NULL!	0	2	1	#NULL!	#NULL!	1
20	0	4	#NULL!	1	#NULL!	4	#NULL!	1	2	2	0	0	0		0		#NULL!	1		0	0	#NULL!	#NULL!	#NULL!	0	#NULL!	#NULL!	#NULL!	#NULL!	#NULL!	1	#NULL!	4	0	1	#NULL!	0	0	3	0	0	1	#NULL!	0	1	1	#NULL!	#NULL!	1
21	0	0	31	1	0	1.294	#NULL!	1	2	1	1	0	0		0		#NULL!	2		1	0	#NULL!	0	#NULL!	#NULL!	#NULL!	#NULL!	#NULL!	#NULL!	#NULL!	1	0	38	0	1	#NULL!	0	0	1	1	0	2	#NULL!	0	1	0	#NULL!	#NULL!	1
22	1	4	#NULL!	1	0	#NULL!	#NULL!	1	0	2	0	0	0		0		#NULL!	1		0	0	#NULL!	#NULL!	#NULL!	#NULL!	#NULL!	#NULL!	#NULL!	#NULL!	#NULL!	1	#NULL!	4	0	1	#NULL!	0	0	#NULL!	0	0	2	#NULL!	0	2	#NULL!	#NULL!	#NULL!	1
23	0	1	#NULL!	1	#NULL!	2.91	#NULL!	1	0	4	0	0	0		0		#NULL!	1		0	#NULL!	#NULL!	#NULL!	#NULL!	#NULL!	#NULL!	#NULL!	#NULL!	#NULL!	#NULL!	1	#NULL!	1	0	1	#NULL!	#NULL!	0	3	#NULL!	0	#NULL!	#NULL!	0	#NULL!	#NULL!	#NULL!	#NULL!	1
24	1	2	#NULL!	1	1	3	#NULL!	1	0	4	0	1	0		0		#NULL!	1		1	0	#NULL!	4	#NULL!	#NULL!	#NULL!	#NULL!	0	0	0	1	0	9	0	1	#NULL!	0	0	3	1	0	#NULL!	#NULL!	0	#NULL!	0	#NULL!	#NULL!	1
25	0	3	#NULL!	1	1	2.5	#NULL!	1	0	2	0	0	0		0	sepsis	#NULL!	1		1	2	#NULL!	#NULL!	#NULL!	#NULL!	#NULL!	#NULL!	#NULL!	#NULL!	0	1	#NULL!	13	0	1	#NULL!	#NULL!	0	2	#NULL!	0	#NULL!	#NULL!	0	#NULL!	#NULL!	#NULL!	#NULL!	1
26	1	0	32	1	1	1.608	#NULL!	1	2	7	0	0	1	inguinoscrotal hernia	0		#NULL!	1		0	0	#NULL!	4	#NULL!	#NULL!	#NULL!	0	#NULL!	0	0	1	#NULL!	10	0	1	#NULL!	#NULL!	0	2	#NULL!	0	#NULL!	3	0	1	1	1	0	1
27	1	1	99	1	1	2.5	#NULL!	1	0	3	3	1	0		0		#NULL!	1		0	0	#NULL!	0	#NULL!	#NULL!	#NULL!	#NULL!	#NULL!	#NULL!	0	1	#NULL!	9	0	1	#NULL!	0	0	2	#NULL!	0	#NULL!	#NULL!	#NULL!	#NULL!	#NULL!	#NULL!	#NULL!	1
28	1	6	99	1	0	3.05	#NULL!	1	0	2	0	0	0		0		#NULL!	1		0	1	#NULL!	#NULL!	#NULL!	#NULL!	#NULL!	#NULL!	#NULL!	#NULL!	0	1	1	12	0	1	#NULL!	0	0	3	#NULL!	0	#NULL!	#NULL!	0	#NULL!	1	#NULL!	#NULL!	1
29	0	1	99	1	0	3.294	1	1	2	5	2	#NULL!	0		0		#NULL!	1		1	0	1	0	#NULL!	#NULL!	#NULL!	#NULL!	#NULL!	#NULL!	#NULL!	#NULL!	#NULL!	6	0	1	#NULL!	#NULL!	0	3	#NULL!	0	#NULL!	#NULL!	2	#NULL!	#NULL!	#NULL!	#NULL!	1
30	0	0	#NULL!	1	0	3.1	#NULL!	1	0	4	0	0	0		0		#NULL!	2		1	0	#NULL!	#NULL!	#NULL!	#NULL!	#NULL!	#NULL!	#NULL!	#NULL!	#NULL!	#NULL!	#NULL!	6	0	1	#NULL!	#NULL!	0	3	1	0	#NULL!	#NULL!	0	#NULL!	1	#NULL!	#NULL!	1
31	1	10	#NULL!	1	1	#NULL!	2	1	0	2	0	1	0		0		28	1		0	0	2	#NULL!	#NULL!	#NULL!	#NULL!	#NULL!	#NULL!	#NULL!	#NULL!	1	#NULL!	3	0	1	#NULL!	#NULL!	0	#NULL!	0	0	#NULL!	#NULL!	0	#NULL!	0	#NULL!	#NULL!	1
32	1	0	#NULL!	1	1	3	#NULL!	1	0	3	3	0	0		0		#NULL!	1		0	0	#NULL!	#NULL!	#NULL!	#NULL!	#NULL!	#NULL!	#NULL!	#NULL!	#NULL!	1	#NULL!	6	0	2	#NULL!	#NULL!	0	3	0	0	#NULL!	#NULL!	1	#NULL!	#NULL!	#NULL!	#NULL!	1
33	1	5	35	1	0	2.05	2	1	2	2	0	0	0		0		36	1		0	0	2	4	#NULL!	#NULL!	#NULL!	#NULL!	#NULL!	#NULL!	0	1	1	3	0	1	#NULL!	0	0	2	0	0	1	#NULL!	0	1	0	#NULL!	#NULL!	1
34	0	2	#NULL!	1	#NULL!	2.95	#NULL!	1	0	2	0	0	0		0		#NULL!	1		0	0	#NULL!	#NULL!	#NULL!	#NULL!	#NULL!	#NULL!	#NULL!	#NULL!	#NULL!	1	#NULL!	2	0	1	#NULL!	0	0	3	#NULL!	0	#NULL!	#NULL!	0	#NULL!	#NULL!	#NULL!	#NULL!	1
35	0	0	99	1	0	2.8	#NULL!	1	0	7	0	0	1	VSD	0		#NULL!	1		0	0	#NULL!	2	0	0	0	0	0	0	0	1	#NULL!	7	0	1	#NULL!	0	1	3	#NULL!	0	3	#NULL!	0	3	1	#NULL!	#NULL!	0
36	1	3	#NULL!	1	1	2.3	3	1	0	4	3	0	0		0		#NULL!	1		0	0	3	4	#NULL!	#NULL!	#NULL!	#NULL!	#NULL!	#NULL!	1	1	#NULL!	8	0	2	#NULL!	#NULL!	0	2	#NULL!	1	2	3	0	2	#NULL!	#NULL!	#NULL!	1
37	1	8	#NULL!	1	1	1.706	4	1	0	4	0	1	0		0		35	1	farming	0	0	4	0	#NULL!	#NULL!	#NULL!	#NULL!	#NULL!	#NULL!	#NULL!	1	0	15	0	1	#NULL!	#NULL!	0	2	#NULL!	0	#NULL!	#NULL!	0	#NULL!	#NULL!	#NULL!	#NULL!	0
38	1	1	#NULL!	1	0	2.9	#NULL!	1	0	0	0	0	0		0	nnj	#NULL!	1		0	0	#NULL!	#NULL!	#NULL!	#NULL!	#NULL!	#NULL!	#NULL!	#NULL!	#NULL!	1	#NULL!	7	0	1	#NULL!	#NULL!	0	3	1	0	2	5	0	2	1	#NULL!	#NULL!	1
39	0	5	#NULL!	1	0	3.56	2	1	0	2	0	0	0		0		#NULL!	2		0	0	2	#NULL!	#NULL!	#NULL!	#NULL!	#NULL!	#NULL!	#NULL!	#NULL!	1	#NULL!	2	0	1	#NULL!	#NULL!	0	3	#NULL!	0	#NULL!	#NULL!	0	#NULL!	#NULL!	#NULL!	#NULL!	1
40	0	7	#NULL!	1	1	2.9	2	1	0	7	0	0	1	CHD ?VSD ?PDA	0	sepsis	30	1		0	0	2	2	0	0	#NULL!	#NULL!	0	#NULL!	1	1	1	16	0	1	#NULL!	0	1	3	0	0	4	3	0	3	1	1	0	1
41	0	0	36	1	0	2.484	1	1	0	3	1	0	0		0	sepsis	38	1		0	0	#NULL!	#NULL!	#NULL!	#NULL!	#NULL!	#NULL!	#NULL!	#NULL!	0	1	1	5	0	1	#NULL!	#NULL!	0	2	0	0	#NULL!	#NULL!	0	#NULL!	1	0	0	1
42	1	5	#NULL!	1	0	#NULL!	#NULL!	1	0	4	0	0	0		0		#NULL!	1		0	0	#NULL!	#NULL!	#NULL!	#NULL!	#NULL!	#NULL!	#NULL!	#NULL!	#NULL!	1	#NULL!	4	0	1	#NULL!	0	0	#NULL!	#NULL!	0	3	#NULL!	0	3	1	#NULL!	#NULL!	0
43	1	3	#NULL!	1	#NULL!	3.5	#NULL!	1	0	2	0	#NULL!	0		0		#NULL!	1		0	0	#NULL!	#NULL!	#NULL!	#NULL!	#NULL!	#NULL!	#NULL!	#NULL!	#NULL!	1	#NULL!	4	0	1	#NULL!	0	0	3	#NULL!	1	4	4	0	4	0	#NULL!	#NULL!	1
44	0	0	33	1	0	1.626	6	1	0	1	0	0	0		0	nnj	#NULL!	1		0	0	6	4	#NULL!	#NULL!	#NULL!	#NULL!	#NULL!	#NULL!	0	1	1	16	0	1	#NULL!	#NULL!	0	2	#NULL!	0	#NULL!	#NULL!	0	#NULL!	#NULL!	#NULL!	#NULL!	1
45	0	1	#NULL!	1	1	3.1	4	1	0	7	0	1	1	right cleft lip and palate	0		#NULL!	2	trading	1	0	4	4	0	0	#NULL!	0	0	0	0	1	#NULL!	2	0	1	#NULL!	#NULL!	0	3	1	0	1	3	0	1	1	1	0	1
46	1	0	38	1	0	3.244	#NULL!	1	0	3	1	0	0		0	sepsis	#NULL!	1		0	3	#NULL!	0	#NULL!	#NULL!	#NULL!	#NULL!	#NULL!	#NULL!	0	1	0	7	0	1	#NULL!	0	0	3	#NULL!	0	2	#NULL!	0	2	#NULL!	#NULL!	#NULL!	1
47	1	1	99	2	1	3	#NULL!	1	0	3	2	0	0		0	sepsis/nnj	#NULL!	1		1	0	#NULL!	#NULL!	#NULL!	#NULL!	#NULL!	#NULL!	#NULL!	#NULL!	#NULL!	1	#NULL!	12	0	1	#NULL!	#NULL!	0	3	#NULL!	0	2	3	0	2	1	#NULL!	#NULL!	1
48	0	4	#NULL!	2	#NULL!	#NULL!	#NULL!	1	#NULL!	2	#NULL!	0	0		0	sepsis	#NULL!	1		0	0	#NULL!	#NULL!	#NULL!	#NULL!	#NULL!	#NULL!	#NULL!	#NULL!	#NULL!	1	#NULL!	3	0	1	#NULL!	0	0	#NULL!	1	0	1	5	0	#NULL!	#NULL!	#NULL!	#NULL!	1
49	1	0	99	2	0	4.7	3	1	0	6	0	0	0		0		#NULL!	2		1	0	3	#NULL!	#NULL!	#NULL!	#NULL!	#NULL!	#NULL!	#NULL!	#NULL!	1	#NULL!	3	0	1	#NULL!	#NULL!	0	4	#NULL!	0	#NULL!	#NULL!	0	#NULL!	#NULL!	#NULL!	#NULL!	1
50	0	2	99	2	0	3	2	1	0	2	0	0	0		0		#NULL!	1		0	0	2	#NULL!	#NULL!	#NULL!	#NULL!	#NULL!	#NULL!	#NULL!	#NULL!	1	#NULL!	3	0	1	#NULL!	0	0	3	#NULL!	0	#NULL!	#NULL!	0	#NULL!	#NULL!	#NULL!	#NULL!	1
51	0	0	28	1	0	1.282	1	2	0	1	0	0	0		0	sepsis	#NULL!	1		1	0	1	4	#NULL!	#NULL!	#NULL!	#NULL!	#NULL!	#NULL!	0	1	1	35	0	1	#NULL!	#NULL!	0	1	1	0	4	#NULL!	0	6	1	#NULL!	#NULL!	1
52	1	4	99	1	0	2.91	1	1	0	2	0	0	0		0		#NULL!	1		0	1	1	4	#NULL!	#NULL!	#NULL!	#NULL!	#NULL!	#NULL!	0	1	1	3	0	1	#NULL!	#NULL!	0	3	#NULL!	0	4	#NULL!	0	4	1	#NULL!	#NULL!	1
53	1	2	99	1	1	#NULL!	1	1	0	4	1	1	0		0		25	1		0	0	1	2	#NULL!	#NULL!	#NULL!	#NULL!	#NULL!	#NULL!	0	1	1	7	0	1	#NULL!	0	0	#NULL!	0	0	#NULL!	#NULL!	2	#NULL!	0	#NULL!	#NULL!	1
54	1	4	99	1	0	#NULL!	#NULL!	1	0	4	0	0	0		0		#NULL!	1		0	1	#NULL!	2	#NULL!	#NULL!	#NULL!	0	0	0	0	1	1	1	0	1	#NULL!	#NULL!	0	#NULL!	0	0	#NULL!	#NULL!	0	#NULL!	#NULL!	#NULL!	#NULL!	1
55	0	10	#NULL!	1	1	#NULL!	#NULL!	1	0	4	0	#NULL!	0		0		#NULL!	1		0	1	#NULL!	#NULL!	#NULL!	#NULL!	#NULL!	#NULL!	#NULL!	#NULL!	#NULL!	1	#NULL!	2	0	1	#NULL!	0	0	#NULL!	#NULL!	0	#NULL!	#NULL!	0	#NULL!	#NULL!	#NULL!	#NULL!	1
56	0	0	32	1	0	1.9	2	2	0	1	0	0	0		0		32	1		0	0	2	4	#NULL!	#NULL!	#NULL!	#NULL!	#NULL!	#NULL!	0	1	1	6	0	1	#NULL!	#NULL!	0	2	0	0	3	#NULL!	0	3	#NULL!	#NULL!	#NULL!	1
57	1	0	32	1	0	1.77	3	2	0	7	0	0	1	right inguinoscrotal hernia	0		32	1		0	0	2	4	#NULL!	#NULL!	#NULL!	#NULL!	#NULL!	#NULL!	0	1	1	6	0	1	#NULL!	0	0	2	0	0	1	#NULL!	0	1	1	1	0	1
58	0	2	#NULL!	1	0	2.9	#NULL!	1	0	2	0	0	0		0		#NULL!	1	trading	0	0	#NULL!	4	#NULL!	#NULL!	#NULL!	#NULL!	#NULL!	#NULL!	#NULL!	1	1	2	0	1	#NULL!	0	0	3	0	0	2	#NULL!	0	2	#NULL!	#NULL!	#NULL!	1
59	1	8	#NULL!	1	0	#NULL!	#NULL!	1	2	2	0	0	0		0		#NULL!	1		0	0	#NULL!	#NULL!	#NULL!	#NULL!	#NULL!	#NULL!	#NULL!	#NULL!	#NULL!	#NULL!	#NULL!	3	0	1	#NULL!	#NULL!	0	#NULL!	1	0	1	#NULL!	0	1	1	#NULL!	#NULL!	1
60	1	0	99	1	0	2.688	1	1	0	4	1	0	0		0	nnj	29	2		0	0	1	4	#NULL!	#NULL!	#NULL!	#NULL!	#NULL!	#NULL!	1	1	#NULL!	11	0	1	#NULL!	#NULL!	0	3	0	0	1	#NULL!	1	1	1	#NULL!	#NULL!	1
61	0	#NULL!	99	1	0	3.016	3	1	2	5	0	0	0		0		#NULL!	1		0	0	3	4	#NULL!	#NULL!	#NULL!	#NULL!	#NULL!	#NULL!	1	1	1	3	0	1	#NULL!	0	0	3	0	0	1	1	0	1	1	#NULL!	#NULL!	1
62	1	3	38	1	1	3.1	2	1	0	2	0	0	0		0		#NULL!	1		0	0	2	4	#NULL!	#NULL!	#NULL!	#NULL!	#NULL!	#NULL!	0	1	#NULL!	13	0	1	#NULL!	0	0	3	0	0	#NULL!	#NULL!	1	#NULL!	1	#NULL!	#NULL!	1
63	1	0	34	1	0	2.256	2	1	2	7	0	0	1	VSD	0		#NULL!	1		0	0	#NULL!	4	#NULL!	#NULL!	#NULL!	#NULL!	#NULL!	#NULL!	#NULL!	#NULL!	1	9	0	1	#NULL!	#NULL!	1	2	0	1	3	#NULL!	0	3	#NULL!	#NULL!	#NULL!	1
64	1	0	28	1	0	1.39	4	1	0	1	2	0	0		0		#NULL!	1		0	0	4	0	#NULL!	#NULL!	#NULL!	#NULL!	#NULL!	#NULL!	#NULL!	1	0	25	0	1	#NULL!	#NULL!	0	1	#NULL!	1	#NULL!	#NULL!	1	#NULL!	#NULL!	#NULL!	#NULL!	1
65	1	4	#NULL!	1	1	#NULL!	#NULL!	1	0	3	3	0	0		0	sepsis	#NULL!	1		0	0	#NULL!	#NULL!	#NULL!	#NULL!	#NULL!	#NULL!	#NULL!	#NULL!	#NULL!	#NULL!	#NULL!	12	0	1	#NULL!	0	0	#NULL!	1	0	2	4	0	2	1	#NULL!	#NULL!	1
66	0	1	99	1	0	2.9	1	1	2	9	0	0	0		0		#NULL!	1		0	0	1	4	#NULL!	#NULL!	#NULL!	#NULL!	#NULL!	#NULL!	#NULL!	1	1	3	0	1	#NULL!	#NULL!	0	3	1	0	3	4	0	2	1	#NULL!	#NULL!	1
67	1	22	#NULL!	1	1	#NULL!	#NULL!	1	0	4	0	0	0		0		#NULL!	2		0	0	#NULL!	#NULL!	#NULL!	#NULL!	#NULL!	#NULL!	#NULL!	#NULL!	#NULL!	#NULL!	#NULL!	11	0	1	#NULL!	0	0	#NULL!	#NULL!	0	#NULL!	#NULL!	0	#NULL!	1	#NULL!	#NULL!	1
68	0	0	36	1	0	2.266	#NULL!	1	2	3	2	0	0		0		#NULL!	1		0	1	#NULL!	#NULL!	#NULL!	#NULL!	#NULL!	#NULL!	#NULL!	#NULL!	#NULL!	1	#NULL!	5	0	1	#NULL!	0	0	2	#NULL!	1	#NULL!	#NULL!	0	#NULL!	#NULL!	#NULL!	#NULL!	1
69	1	1	99	1	0	1.59	3	1	2	11	0	0	0		0		43	1		0	0	3	4	#NULL!	#NULL!	#NULL!	#NULL!	#NULL!	#NULL!	0	1	1	3	0	1	#NULL!	0	0	2	0	0	1	3	0	1	1	#NULL!	#NULL!	1
70	1	15	#NULL!	2	0	#NULL!	#NULL!	1	2	4	0	0	0		0		#NULL!	1		0	0	#NULL!	4	#NULL!	#NULL!	#NULL!	#NULL!	#NULL!	#NULL!	0	1	1	2	0	1	#NULL!	0	0	#NULL!	0	#NULL!	3	#NULL!	0	3	1	#NULL!	#NULL!	1
71	1	4	#NULL!	2	0	#NULL!	3	1	2	2	0	0	0		0		#NULL!	1		0	0	3	#NULL!	#NULL!	#NULL!	#NULL!	#NULL!	#NULL!	#NULL!	#NULL!	1	#NULL!	5	0	1	#NULL!	#NULL!	0	#NULL!	0	0	2	#NULL!	0	2	1	#NULL!	#NULL!	1
72	0	20	#NULL!	2	1	#NULL!	1	1	0	4	#NULL!	#NULL!	0		#NULL!		#NULL!	1		0	0	1	4	#NULL!	#NULL!	#NULL!	#NULL!	#NULL!	#NULL!	0	1	1	8	0	1	#NULL!	0	0	#NULL!	1	0	2	#NULL!	0	#NULL!	1	#NULL!	#NULL!	1
73	1	0	99	2	0	2.858	#NULL!	1	2	3	1	0	0		0		#NULL!	2		0	0	#NULL!	#NULL!	#NULL!	#NULL!	#NULL!	#NULL!	#NULL!	#NULL!	#NULL!	1	#NULL!	1	0	1	#NULL!	#NULL!	0	3	1	0	4	#NULL!	0	4	0	#NULL!	#NULL!	1
74	1	4	#NULL!	1	0	3.118	1	1	0	3	2	0	0		0	nnj	#NULL!	1		0	0	1	4	#NULL!	#NULL!	#NULL!	#NULL!	0	#NULL!	0	1	1	3	0	1	#NULL!	0	0	3	#NULL!	0	#NULL!	#NULL!	0	#NULL!	#NULL!	#NULL!	#NULL!	1
75	0	0	34	1	1	1.84	6	1	0	1	2	0	0		0		#NULL!	2		1	0	6	4	#NULL!	#NULL!	#NULL!	1	#NULL!	#NULL!	1	1	1	5	0	1	#NULL!	0	0	2	0	0	1	#NULL!	0	1	1	#NULL!	#NULL!	1
76	0	0	33	1	1	1.4	5	1	2	1	2	0	0		0		30	2		1	0	5	4	#NULL!	#NULL!	#NULL!	#NULL!	#NULL!	#NULL!	0	1	1	11	0	1	#NULL!	#NULL!	0	1	#NULL!	1	#NULL!	#NULL!	0	#NULL!	#NULL!	#NULL!	#NULL!	1
77	1	0	#NULL!	2	1	2.492	#NULL!	1	#NULL!	3	3	0	0		0		#NULL!	1		0	0	#NULL!	#NULL!	#NULL!	#NULL!	#NULL!	#NULL!	#NULL!	#NULL!	#NULL!	#NULL!	#NULL!	3	0	1	#NULL!	#NULL!	0	2	1	0	#NULL!	#NULL!	1	#NULL!	#NULL!	#NULL!	#NULL!	1
78	0	4	38	2	1	1.8	#NULL!	2	2	4	2	0	0		0	nnj	#NULL!	2		0	0	#NULL!	#NULL!	#NULL!	#NULL!	#NULL!	#NULL!	#NULL!	#NULL!	1	#NULL!	#NULL!	5	0	1	#NULL!	#NULL!	0	2	0	0	3	6	0	3	1	#NULL!	#NULL!	1
79	1	14	99	2	0	#NULL!	#NULL!	1	0	4	0	0	0		0		#NULL!	1		0	0	#NULL!	4	#NULL!	#NULL!	#NULL!	#NULL!	#NULL!	#NULL!	#NULL!	1	1	3	0	1	#NULL!	0	0	#NULL!	#NULL!	1	#NULL!	#NULL!	0	#NULL!	1	#NULL!	#NULL!	1
80	0	15	99	2	1	#NULL!	#NULL!	1	0	4	#NULL!	1	0		0		#NULL!	1		0	0	#NULL!	0	#NULL!	#NULL!	#NULL!	#NULL!	#NULL!	#NULL!	#NULL!	#NULL!	#NULL!	2	0	1	#NULL!	#NULL!	0	#NULL!	#NULL!	0	3	#NULL!	0	3	#NULL!	#NULL!	#NULL!	1
81	0	#NULL!	99	1	0	2.772	#NULL!	1	#NULL!	2	#NULL!	0	0		0	sepsis	#NULL!	1		0	0	#NULL!	#NULL!	#NULL!	#NULL!	#NULL!	#NULL!	#NULL!	#NULL!	#NULL!	#NULL!	#NULL!	3	0	1	#NULL!	0	0	3	#NULL!	1	1	#NULL!	0	1	1	#NULL!	#NULL!	1
82	1	2	99	2	1	#NULL!	#NULL!	1	0	4	#NULL!	0	0		0		#NULL!	1		1	0	#NULL!	#NULL!	#NULL!	#NULL!	#NULL!	#NULL!	#NULL!	#NULL!	#NULL!	1	#NULL!	2	0	1	#NULL!	0	0	#NULL!	0	0	#NULL!	#NULL!	0	#NULL!	#NULL!	#NULL!	#NULL!	1
83	1	4	#NULL!	2	1	#NULL!	1	1	0	2	0	0	0		0	sepsis	#NULL!	1		0	0	1	#NULL!	#NULL!	#NULL!	#NULL!	#NULL!	#NULL!	#NULL!	#NULL!	#NULL!	#NULL!	6	0	1	#NULL!	#NULL!	0	#NULL!	#NULL!	0	1	#NULL!	0	1	1	#NULL!	#NULL!	1
84	1	1	99	1	0	2.98	#NULL!	1	2	5	0	0	0		0		#NULL!	1		0	0	#NULL!	#NULL!	#NULL!	#NULL!	#NULL!	#NULL!	#NULL!	#NULL!	#NULL!	#NULL!	#NULL!	2	0	1	#NULL!	#NULL!	0	3	1	0	4	#NULL!	0	6	1	#NULL!	#NULL!	1
85	1	3	40	1	0	2.97	#NULL!	1	2	12	0	0	0		0		29	1		0	0	#NULL!	#NULL!	#NULL!	#NULL!	#NULL!	#NULL!	#NULL!	#NULL!	#NULL!	1	#NULL!	3	0	1	#NULL!	0	0	3	1	0	4	3	0	5	1	#NULL!	#NULL!	1
86	1	0	40	1	0	3.56	2	1	0	3	2	0	0		0	branchial plexus injury	30	1		0	0	2	4	#NULL!	#NULL!	#NULL!	#NULL!	#NULL!	0	0	#NULL!	#NULL!	1	0	1	#NULL!	#NULL!	0	3	#NULL!	0	#NULL!	#NULL!	0	#NULL!	#NULL!	#NULL!	#NULL!	1
87	1	1	31	1	0	2.27	1	1	0	1	0	0	0		0	sepsis	23	1		1	0	1	4	#NULL!	#NULL!	#NULL!	#NULL!	#NULL!	#NULL!	0	#NULL!	#NULL!	6	0	1	#NULL!	0	0	2	0	0	#NULL!	#NULL!	0	#NULL!	#NULL!	#NULL!	#NULL!	1
88	1	4	#NULL!	1	1	2.92	#NULL!	1	0	13	1	0	0		0	sepsis	#NULL!	1		0	1	#NULL!	#NULL!	#NULL!	#NULL!	#NULL!	#NULL!	#NULL!	#NULL!	0	#NULL!	#NULL!	6	0	1	#NULL!	0	0	3	0	1	#NULL!	#NULL!	0	#NULL!	1	#NULL!	#NULL!	1
89	1	0	29	1	1	1.308	2	2	0	1	0	0	0		0		28	2		0	0	1	2	#NULL!	#NULL!	#NULL!	#NULL!	#NULL!	#NULL!	0	#NULL!	#NULL!	20	0	1	#NULL!	#NULL!	0	1	0	1	#NULL!	#NULL!	0	#NULL!	0	#NULL!	#NULL!	1
90	0	0	99	1	0	2.844	2	1	2	5	0	0	0		0		31	1		0	0	2	#NULL!	#NULL!	#NULL!	#NULL!	#NULL!	#NULL!	#NULL!	#NULL!	#NULL!	#NULL!	5	0	1	#NULL!	#NULL!	0	3	0	#NULL!	#NULL!	#NULL!	0	#NULL!	#NULL!	#NULL!	#NULL!	1
91	1	0	29	1	1	1.3	1	2	0	1	2	0	0		0	sepsis	28	2		0	0	1	4	#NULL!	#NULL!	#NULL!	#NULL!	#NULL!	#NULL!	0	1	#NULL!	24	0	1	#NULL!	#NULL!	0	1	0	0	#NULL!	#NULL!	0	#NULL!	#NULL!	#NULL!	#NULL!	1
92	1	2	40	1	1	3.03	1	1	0	2	0	0	0		0		#NULL!	1		1	0	1	#NULL!	#NULL!	#NULL!	#NULL!	#NULL!	#NULL!	#NULL!	0	1	#NULL!	4	0	1	#NULL!	#NULL!	0	3	#NULL!	0	1	#NULL!	0	1	#NULL!	#NULL!	#NULL!	1
93	1	0	37	1	1	4.2	5	1	0	6	1	0	0		0	erb's palsy	35	2		1	0	5	0	#NULL!	#NULL!	#NULL!	#NULL!	#NULL!	#NULL!	0	1	#NULL!	4	0	1	#NULL!	#NULL!	0	4	0	0	#NULL!	#NULL!	0	#NULL!	#NULL!	#NULL!	#NULL!	1
94	1	10	37	1	0	1.76	1	1	0	7	0	1	1	TEF	0	sepsis	#NULL!	2		0	0	1	0	#NULL!	#NULL!	#NULL!	#NULL!	#NULL!	#NULL!	#NULL!	1	0	9	0	3	#NULL!	#NULL!	1	2	#NULL!	0	2	#NULL!	0	2	1	1	0	1
95	1	10	#NULL!	1	1	#NULL!	4	1	0	2	0	0	0		0	sepsis	#NULL!	1		1	0	4	#NULL!	#NULL!	#NULL!	#NULL!	#NULL!	#NULL!	1	0	1	#NULL!	4	0	1	#NULL!	#NULL!	0	#NULL!	0	0	#NULL!	3	0	#NULL!	#NULL!	#NULL!	#NULL!	1
96	0	0	39	1	0	3.128	1	1	2	5	0	0	0		0	nnj	24	2		0	0	1	1	#NULL!	#NULL!	#NULL!	#NULL!	#NULL!	#NULL!	0	1	1	6	0	1	#NULL!	0	0	3	0	0	2	3	0	2	1	#NULL!	#NULL!	1
97	1	6	#NULL!	1	1	3.4	3	1	2	2	0	0	0		0		34	2		0	0	3	4	#NULL!	#NULL!	#NULL!	#NULL!	#NULL!	#NULL!	0	#NULL!	#NULL!	3	0	1	#NULL!	#NULL!	0	3	1	0	1	1	0	1	1	#NULL!	#NULL!	1
98	0	4	99	1	1	2.5	1	1	0	2	0	0	0		0		30	1		0	#NULL!	1	2	0	0	#NULL!	0	0	0	0	1	#NULL!	2	0	1	#NULL!	0	0	2	#NULL!	0	#NULL!	#NULL!	1	#NULL!	#NULL!	#NULL!	#NULL!	1
99	0	1	99	1	1	2.6	5	1	0	3	2	0	0		0	sepsis	36	2		1	0	5	4	#NULL!	#NULL!	#NULL!	#NULL!	#NULL!	#NULL!	0	#NULL!	1	6	0	1	#NULL!	#NULL!	0	3	1	0	2	3	0	1	1	#NULL!	#NULL!	1
100	1	0	38	1	0	3.592	3	2	0	3	2	0	0		0		#NULL!	1		0	0	2	4	#NULL!	#NULL!	#NULL!	#NULL!	#NULL!	#NULL!	0	1	1	2	0	1	#NULL!	0	0	3	0	0	2	4	0	2	#NULL!	#NULL!	#NULL!	1
101	1	0	29	1	0	1.26	3	1	2	1	0	0	0		0	HDN	30	2		0	0	3	2	0	0	#NULL!	#NULL!	0	#NULL!	1	1	1	1	1	4	1	1	0	1	1	0	1	3	0	1	1	#NULL!	#NULL!	1
102	1	0	99	1	1	3.1	#NULL!	1	2	3	3	0	0		0		#NULL!	1		0	0	#NULL!	#NULL!	#NULL!	#NULL!	#NULL!	#NULL!	#NULL!	#NULL!	#NULL!	1	#NULL!	1	1	4	1	1	0	3	0	0	1	#NULL!	0	1	#NULL!	#NULL!	#NULL!	1
103	1	0	28	1	1	1.506	4	1	0	1	0	1	0		0		#NULL!	1		1	0	4	0	#NULL!	#NULL!	#NULL!	#NULL!	#NULL!	#NULL!	0	#NULL!	0	1	1	4	1	1	0	2	0	0	4	4	0	5	0	#NULL!	#NULL!	1
104	0	0	25	1	0	0.764	1	1	#NULL!	1	0	0	0		0	HDN	#NULL!	1		0	0	1	4	#NULL!	#NULL!	#NULL!	#NULL!	#NULL!	#NULL!	#NULL!	1	#NULL!	1	1	4	1	1	0	0	0	1	1	#NULL!	0	1	0	#NULL!	#NULL!	0
105	0	0	30	1	1	0.666	1	2	0	1	0	0	0		0		#NULL!	2		0	0	1	#NULL!	#NULL!	#NULL!	#NULL!	#NULL!	#NULL!	#NULL!	#NULL!	1	#NULL!	25	1	4	25	1	0	0	#NULL!	1	4	#NULL!	0	4	#NULL!	#NULL!	#NULL!	1
106	1	5	#NULL!	1	1	2.058	#NULL!	1	0	2	0	0	0		0		#NULL!	#NULL!		0	0	#NULL!	4	#NULL!	#NULL!	#NULL!	#NULL!	#NULL!	#NULL!	#NULL!	1	#NULL!	2	1	4	7	1	0	2	0	0	1	1	0	1	1	#NULL!	#NULL!	1
107	1	3	#NULL!	1	1	2.428	#NULL!	1	#NULL!	2	#NULL!	#NULL!	0		0		#NULL!	#NULL!		0	0	#NULL!	#NULL!	#NULL!	#NULL!	#NULL!	#NULL!	#NULL!	#NULL!	#NULL!	#NULL!	#NULL!	1	1	4	4	1	0	2	#NULL!	0	3	4	0	3	1	#NULL!	#NULL!	1
108	0	7	#NULL!	1	1	#NULL!	#NULL!	1	0	8	#NULL!	#NULL!	0		0	nnj	#NULL!	1		0	0	#NULL!	#NULL!	#NULL!	#NULL!	#NULL!	#NULL!	#NULL!	#NULL!	#NULL!	#NULL!	#NULL!	2	0	2	45	1	0	#NULL!	0	0	1	3	#NULL!	1	1	#NULL!	#NULL!	1
109	0	0	43	1	0	3	3	1	2	3	3	0	0		0		30	1		0	1	3	2	#NULL!	#NULL!	#NULL!	#NULL!	#NULL!	#NULL!	#NULL!	1	1	1	1	4	1	1	0	3	0	0	4	5	0	5	1	#NULL!	#NULL!	1
110	1	0	27	1	0	1.34	#NULL!	2	2	1	3	0	0		0		#NULL!	1		1	0	#NULL!	4	#NULL!	#NULL!	#NULL!	#NULL!	#NULL!	#NULL!	1	1	#NULL!	1	1	4	1	1	0	1	0	0	3	#NULL!	0	2	1	#NULL!	#NULL!	1
111	0	0	34	2	0	2	4	1	0	1	0	0	0		0		38	1		0	0	4	#NULL!	#NULL!	#NULL!	#NULL!	#NULL!	#NULL!	#NULL!	0	#NULL!	#NULL!	3	0	1	#NULL!	0	0	2	1	0	3	3	0	3	1	#NULL!	#NULL!	0
112	1	8	99	2	1	#NULL!	#NULL!	#NULL!	0	4	#NULL!	0	0		0	nnj	#NULL!	1		0	0	#NULL!	4	#NULL!	#NULL!	#NULL!	#NULL!	#NULL!	#NULL!	0	1	1	8	0	1	#NULL!	0	0	#NULL!	0	0	#NULL!	#NULL!	0	#NULL!	#NULL!	#NULL!	#NULL!	0
113	1	24	#NULL!	2	#NULL!	#NULL!	#NULL!	#NULL!	#NULL!	4	#NULL!	#NULL!	0		0		#NULL!	1		0	0	#NULL!	#NULL!	#NULL!	#NULL!	#NULL!	#NULL!	#NULL!	#NULL!	#NULL!	#NULL!	#NULL!	24	0	1	#NULL!	0	0	#NULL!	1	0	4	#NULL!	0	4	0	#NULL!	#NULL!	0
114	0	27	99	2	1	#NULL!	2	1	0	14	0	1	0		0	sepsis	#NULL!	1		0	0	2	4	#NULL!	#NULL!	#NULL!	#NULL!	#NULL!	#NULL!	0	#NULL!	#NULL!	4	0	1	#NULL!	0	0	#NULL!	1	0	1	#NULL!	0	1	1	#NULL!	#NULL!	0
115	0	0	99	2	1	3.45	5	1	0	5	0	1	0		0		#NULL!	2		1	0	5	4	#NULL!	#NULL!	#NULL!	1	#NULL!	#NULL!	0	1	#NULL!	2	0	2	#NULL!	#NULL!	0	3	1	0	1	#NULL!	0	1	#NULL!	#NULL!	#NULL!	0
116	1	7	#NULL!	2	1	#NULL!	#NULL!	1	0	2	#NULL!	0	0		0	sepsis	#NULL!	1		0	0	#NULL!	4	#NULL!	#NULL!	#NULL!	#NULL!	#NULL!	#NULL!	0	#NULL!	#NULL!	12	0	1	#NULL!	#NULL!	0	#NULL!	#NULL!	0	#NULL!	#NULL!	0	#NULL!	1	#NULL!	#NULL!	0
117	0	1	99	2	1	2.6	2	#NULL!	0	4	#NULL!	#NULL!	0		0		28	1		1	0	2	1	#NULL!	#NULL!	1	1	0	0	0	1	1	8	0	1	#NULL!	0	0	3	#NULL!	0	#NULL!	#NULL!	0	#NULL!	#NULL!	#NULL!	#NULL!	0
118	1	7	#NULL!	2	#NULL!	#NULL!	#NULL!	#NULL!	#NULL!	2	#NULL!	#NULL!	0		0		#NULL!	1		0	0	#NULL!	#NULL!	#NULL!	#NULL!	#NULL!	#NULL!	#NULL!	#NULL!	#NULL!	#NULL!	#NULL!	2	0	1	#NULL!	0	0	#NULL!	#NULL!	0	#NULL!	#NULL!	0	#NULL!	#NULL!	#NULL!	#NULL!	0
119	1	0	99	2	0	2.748	2	2	2	3	1	0	0		0		#NULL!	1		0	0	2	4	#NULL!	#NULL!	#NULL!	#NULL!	0	#NULL!	0	1	1	1	0	1	#NULL!	0	0	3	0	0	3	3	1	3	1	#NULL!	#NULL!	0
120	0	0	99	2	0	2.9	#NULL!	1	2	0	0	0	0		0		#NULL!	1		0	3	#NULL!	#NULL!	#NULL!	#NULL!	#NULL!	#NULL!	#NULL!	#NULL!	#NULL!	#NULL!	#NULL!	1	0	1	#NULL!	#NULL!	0	3	1	0	#NULL!	#NULL!	0	#NULL!	1	#NULL!	#NULL!	0
121	1	5	99	2	1	#NULL!	1	1	0	2	0	1	0		0	sepsis	#NULL!	1		0	0	1	0	#NULL!	#NULL!	#NULL!	#NULL!	#NULL!	1	0	#NULL!	0	5	0	1	#NULL!	0	0	#NULL!	1	0	4	5	0	4	#NULL!	#NULL!	#NULL!	1
122	0	3	#NULL!	2	1	#NULL!	1	1	0	2	0	0	0		0	sepsis	#NULL!	1		1	0	1	#NULL!	#NULL!	#NULL!	#NULL!	#NULL!	#NULL!	#NULL!	0	1	#NULL!	7	0	2	#NULL!	0	0	#NULL!	0	1	#NULL!	#NULL!	0	#NULL!	1	#NULL!	#NULL!	1
123	1	6	99	2	#NULL!	#NULL!	4	#NULL!	2	2	0	0	0		0		#NULL!	1		0	1	4	#NULL!	#NULL!	#NULL!	#NULL!	#NULL!	#NULL!	#NULL!	#NULL!	1	#NULL!	2	0	1	#NULL!	0	0	#NULL!	#NULL!	1	#NULL!	#NULL!	0	#NULL!	#NULL!	#NULL!	#NULL!	1
124	1	2	99	2	1	#NULL!	3	1	0	2	0	0	0		0		#NULL!	1		0	0	3	2	#NULL!	#NULL!	2	1	#NULL!	#NULL!	0	1	1	3	0	1	#NULL!	0	0	#NULL!	0	1	2	#NULL!	0	2	1	#NULL!	#NULL!	1
125	0	0	99	2	0	2.44	#NULL!	1	0	5	1	#NULL!	0		0		#NULL!	1		0	0	#NULL!	#NULL!	#NULL!	#NULL!	#NULL!	#NULL!	#NULL!	#NULL!	#NULL!	1	#NULL!	2	0	1	#NULL!	#NULL!	0	2	0	0	4	#NULL!	0	5	1	#NULL!	#NULL!	0
126	1	9	#NULL!	2	1	2.8	4	1	0	7	0	0	1	club feet	0		#NULL!	1		0	0	4	#NULL!	#NULL!	#NULL!	#NULL!	#NULL!	#NULL!	#NULL!	#NULL!	1	#NULL!	1	0	1	#NULL!	#NULL!	0	3	0	0	1	#NULL!	1	3	1	1	0	1
127	0	0	33	2	0	1.604	#NULL!	2	2	1	0	0	0		0		#NULL!	1		1	0	#NULL!	0	#NULL!	#NULL!	#NULL!	#NULL!	#NULL!	#NULL!	0	1	0	5	0	1	#NULL!	#NULL!	0	2	#NULL!	0	#NULL!	#NULL!	0	#NULL!	1	#NULL!	#NULL!	1
128	1	0	33	2	0	1.884	#NULL!	2	2	1	#NULL!	0	0		0		#NULL!	1		1	0	#NULL!	0	#NULL!	#NULL!	#NULL!	#NULL!	#NULL!	#NULL!	0	1	0	5	0	1	#NULL!	#NULL!	0	2	0	0	2	3	0	2	1	0	0	1
129	0	10	99	2	1	#NULL!	#NULL!	1	0	8	0	1	0		0		#NULL!	2		1	2	#NULL!	0	#NULL!	#NULL!	#NULL!	#NULL!	#NULL!	#NULL!	0	1	0	1	1	4	11	1	0	#NULL!	#NULL!	0	#NULL!	#NULL!	0	#NULL!	#NULL!	#NULL!	#NULL!	1
130	0	6	#NULL!	2	1	#NULL!	1	1	0	15	0	1	0		0		#NULL!	1		0	0	1	#NULL!	#NULL!	#NULL!	#NULL!	#NULL!	#NULL!	#NULL!	0	#NULL!	0	1	1	4	7	1	0	#NULL!	0	0	2	#NULL!	0	2	1	#NULL!	#NULL!	1
131	1	0	40	2	0	2.5	1	1	2	16	1	0	0		0		20	2		0	0	1	0	#NULL!	#NULL!	#NULL!	#NULL!	#NULL!	#NULL!	0	#NULL!	0	1	1	4	1	1	0	2	0	0	#NULL!	#NULL!	2	#NULL!	#NULL!	#NULL!	#NULL!	1
132	0	6	#NULL!	2	0	#NULL!	7	1	#NULL!	2	0	#NULL!	0		0	sepsis	#NULL!	2		0	0	7	#NULL!	#NULL!	#NULL!	#NULL!	#NULL!	#NULL!	#NULL!	#NULL!	#NULL!	#NULL!	3	1	4	9	1	0	#NULL!	0	0	1	#NULL!	0	1	0	#NULL!	#NULL!	1
133	1	0	99	2	0	2.968	1	1	2	3	3	0	0		0		#NULL!	2		0	0	1	#NULL!	#NULL!	#NULL!	#NULL!	#NULL!	#NULL!	#NULL!	#NULL!	#NULL!	#NULL!	3	1	4	3	1	0	3	#NULL!	0	1	#NULL!	0	1	#NULL!	#NULL!	#NULL!	0
134	0	0	27	2	0	0.83	3	1	1	1	1	0	0		0		#NULL!	1		1	0	3	2	#NULL!	#NULL!	#NULL!	#NULL!	#NULL!	#NULL!	1	1	0	4	1	4	4	1	0	0	0	0	4	#NULL!	1	4	#NULL!	#NULL!	#NULL!	1
135	0	0	26	2	0	0.86	5	1	0	1	0	0	0		0	nnj	#NULL!	2		0	0	5	4	#NULL!	#NULL!	#NULL!	#NULL!	#NULL!	#NULL!	0	1	1	3	1	4	3	1	0	0	0	0	3	#NULL!	0	3	1	1	0	1
136	1	0	#NULL!	2	1	1.098	4	2	0	1	0	0	0		0		#NULL!	1		1	0	3	4	#NULL!	#NULL!	#NULL!	#NULL!	#NULL!	#NULL!	0	1	1	24	1	4	24	1	0	1	0	0	#NULL!	#NULL!	0	#NULL!	#NULL!	#NULL!	#NULL!	1
137	1	0	#NULL!	2	1	1.154	3	2	0	1	0	0	0		0		#NULL!	1		1	0	3	4	#NULL!	#NULL!	#NULL!	#NULL!	#NULL!	#NULL!	0	1	1	3	1	4	3	1	0	1	#NULL!	1	4	#NULL!	0	4	#NULL!	#NULL!	#NULL!	1
138	1	1	99	2	1	2.874	1	1	0	16	1	1	0		0		#NULL!	1		0	0	1	4	#NULL!	#NULL!	#NULL!	#NULL!	#NULL!	#NULL!	#NULL!	#NULL!	1	2	1	4	3	1	0	3	1	0	#NULL!	#NULL!	0	#NULL!	0	#NULL!	#NULL!	1
139	0	5	99	2	0	#NULL!	#NULL!	1	0	2	0	0	0		0		#NULL!	1		0	0	#NULL!	#NULL!	#NULL!	#NULL!	#NULL!	#NULL!	#NULL!	#NULL!	#NULL!	1	1	1	0	2	#NULL!	#NULL!	0	#NULL!	1	0	#NULL!	#NULL!	0	#NULL!	0	#NULL!	#NULL!	1
140	0	13	99	2	1	3.06	4	1	0	5	0	1	0		0		#NULL!	2		0	0	4	0	#NULL!	#NULL!	#NULL!	#NULL!	#NULL!	#NULL!	0	1	0	5	0	1	#NULL!	#NULL!	0	3	0	1	#NULL!	#NULL!	2	#NULL!	0	#NULL!	#NULL!	0
141	1	5	#NULL!	2	#NULL!	#NULL!	3	1	0	2	0	#NULL!	0		0		#NULL!	2		0	1	3	#NULL!	#NULL!	#NULL!	#NULL!	#NULL!	#NULL!	#NULL!	#NULL!	1	#NULL!	3	0	1	#NULL!	0	0	#NULL!	#NULL!	0	1	#NULL!	0	1	#NULL!	#NULL!	#NULL!	0
142	1	#NULL!	99	2	1	2.63	4	1	2	7	0	#NULL!	1	omphalocoele	0	sepsis	#NULL!	2		1	0	4	#NULL!	#NULL!	#NULL!	#NULL!	#NULL!	#NULL!	#NULL!	#NULL!	1	1	5	0	3	#NULL!	#NULL!	1	3	#NULL!	0	3	3	0	3	1	#NULL!	#NULL!	1
143	0	18	99	2	1	#NULL!	#NULL!	1	0	17	0	0	0		0		#NULL!	2		1	0	#NULL!	#NULL!	#NULL!	#NULL!	#NULL!	#NULL!	#NULL!	#NULL!	#NULL!	1	#NULL!	5	0	1	#NULL!	#NULL!	0	#NULL!	0	0	1	2	0	1	0	#NULL!	#NULL!	0
144	0	0	36	2	0	1.62	#NULL!	1	2	1	1	0	0		0		#NULL!	1		0	0	#NULL!	4	#NULL!	#NULL!	#NULL!	#NULL!	#NULL!	#NULL!	#NULL!	#NULL!	1	31	0	1	#NULL!	#NULL!	0	2	#NULL!	0	4	#NULL!	0	6	#NULL!	#NULL!	#NULL!	0
145	1	0	#NULL!	2	0	3.204	4	1	0	13	0	0	0		0	congenital syphilis	#NULL!	2		0	3	4	4	#NULL!	#NULL!	#NULL!	#NULL!	1	#NULL!	1	1	1	2	0	1	#NULL!	0	0	3	0	0	1	#NULL!	0	1	#NULL!	#NULL!	#NULL!	0
146	1	0	27	2	1	1.462	1	1	0	1	0	0	0		0		#NULL!	1		0	0	1	4	#NULL!	#NULL!	#NULL!	#NULL!	#NULL!	0	1	1	1	26	0	1	#NULL!	#NULL!	0	1	1	0	3	#NULL!	0	3	1	#NULL!	#NULL!	0
147	1	2	#NULL!	2	0	#NULL!	3	1	2	2	0	0	0		0		#NULL!	1		0	0	3	4	#NULL!	#NULL!	#NULL!	#NULL!	#NULL!	#NULL!	0	1	1	3	0	1	#NULL!	#NULL!	0	#NULL!	1	0	4	#NULL!	0	5	1	#NULL!	#NULL!	0
148	0	17	#NULL!	2	#NULL!	#NULL!	#NULL!	1	0	4	0	#NULL!	0		0		#NULL!	1		1	0	#NULL!	#NULL!	#NULL!	#NULL!	#NULL!	#NULL!	#NULL!	#NULL!	#NULL!	1	#NULL!	4	0	1	#NULL!	#NULL!	0	#NULL!	#NULL!	0	4	#NULL!	0	3	1	#NULL!	#NULL!	0
149	1	0	99	2	1	3.43	1	1	1	16	1	0	0		0		#NULL!	1		0	0	1	4	#NULL!	#NULL!	#NULL!	#NULL!	#NULL!	#NULL!	0	#NULL!	1	7	0	1	#NULL!	0	0	3	#NULL!	0	3	#NULL!	0	3	1	#NULL!	#NULL!	0
150	0	0	25	2	0	0.83	3	2	1	1	0	0	0		0		#NULL!	1		0	0	3	#NULL!	#NULL!	#NULL!	#NULL!	#NULL!	#NULL!	#NULL!	0	#NULL!	#NULL!	2	1	4	2	1	0	0	0	0	1	#NULL!	0	1	1	#NULL!	#NULL!	0
151	1	2	#NULL!	2	1	3.5	1	1	0	4	1	0	0		0		#NULL!	2		1	0	1	4	#NULL!	#NULL!	#NULL!	#NULL!	#NULL!	#NULL!	1	1	1	3	0	1	#NULL!	#NULL!	0	3	0	0	#NULL!	#NULL!	0	#NULL!	#NULL!	#NULL!	#NULL!	0
152	0	3	#NULL!	2	0	#NULL!	#NULL!	1	2	2	0	0	0		0		#NULL!	1		0	0	#NULL!	#NULL!	#NULL!	#NULL!	#NULL!	#NULL!	#NULL!	#NULL!	0	1	#NULL!	2	0	1	#NULL!	0	0	#NULL!	0	1	4	#NULL!	0	4	0	#NULL!	#NULL!	1
153	1	0	34	2	0	1.9	#NULL!	1	2	1	0	0	0		0		#NULL!	1		0	0	#NULL!	4	#NULL!	#NULL!	#NULL!	#NULL!	#NULL!	#NULL!	0	1	1	4	0	1	#NULL!	#NULL!	0	2	#NULL!	0	3	#NULL!	1	3	#NULL!	#NULL!	#NULL!	1
154	0	#NULL!	38	2	0	2.9	1	1	2	5	2	0	0		0		#NULL!	1		1	0	1	4	#NULL!	#NULL!	#NULL!	0	#NULL!	#NULL!	1	1	1	5	0	1	#NULL!	#NULL!	0	3	0	#NULL!	4	#NULL!	0	4	#NULL!	#NULL!	#NULL!	0
155	1	10	99	2	1	#NULL!	#NULL!	1	0	4	0	0	0		0	left otitismedia	#NULL!	1		0	0	#NULL!	4	#NULL!	#NULL!	#NULL!	#NULL!	#NULL!	#NULL!	0	1	1	4	0	1	#NULL!	#NULL!	0	#NULL!	0	1	#NULL!	#NULL!	0	#NULL!	#NULL!	#NULL!	#NULL!	1
156	0	5	36	2	0	#NULL!	2	1	2	2	0	0	0		0		#NULL!	2		0	0	#NULL!	4	#NULL!	#NULL!	#NULL!	0	#NULL!	0	0	1	1	5	0	1	#NULL!	0	0	#NULL!	1	0	#NULL!	#NULL!	0	#NULL!	1	#NULL!	#NULL!	1
157	1	3	37	2	#NULL!	3.1	#NULL!	1	0	2	0	0	0		0		#NULL!	1		0	0	#NULL!	#NULL!	#NULL!	#NULL!	#NULL!	#NULL!	#NULL!	#NULL!	#NULL!	1	#NULL!	4	0	1	#NULL!	0	0	3	#NULL!	0	4	#NULL!	2	4	1	#NULL!	#NULL!	1
158	1	0	28	2	1	1.124	2	2	0	1	0	0	0		0		#NULL!	1		0	0	2	4	#NULL!	#NULL!	#NULL!	#NULL!	#NULL!	#NULL!	#NULL!	1	1	33	0	1	#NULL!	0	0	1	1	0	1	#NULL!	0	1	1	#NULL!	#NULL!	1
159	1	4	#NULL!	2	0	#NULL!	#NULL!	1	0	2	0	0	0		0		#NULL!	1		0	0	#NULL!	#NULL!	#NULL!	#NULL!	#NULL!	#NULL!	#NULL!	#NULL!	#NULL!	1	#NULL!	2	0	1	#NULL!	0	0	#NULL!	#NULL!	0	3	#NULL!	0	3	1	#NULL!	#NULL!	1
160	0	2	99	2	1	2.702	3	1	0	13	2	0	0		0		#NULL!	1		0	0	3	4	#NULL!	#NULL!	#NULL!	#NULL!	#NULL!	#NULL!	0	#NULL!	1	2	0	1	#NULL!	#NULL!	0	3	#NULL!	1	#NULL!	#NULL!	0	#NULL!	#NULL!	#NULL!	#NULL!	1
161	0	4	#NULL!	2	0	#NULL!	#NULL!	1	0	2	0	0	0		0		#NULL!	1		0	0	#NULL!	#NULL!	#NULL!	#NULL!	#NULL!	#NULL!	#NULL!	#NULL!	#NULL!	1	#NULL!	1	0	1	#NULL!	0	0	#NULL!	0	0	1	#NULL!	0	1	1	#NULL!	#NULL!	1
162	0	1	28	2	1	1.4	5	1	0	1	0	0	0		0		#NULL!	2		0	0	5	1	0	0	#NULL!	0	0	0	0	1	1	21	0	1	#NULL!	#NULL!	0	1	1	0	3	#NULL!	0	3	#NULL!	#NULL!	#NULL!	0
163	1	1	99	2	1	3.3	1	1	0	3	3	0	0		0		22	1	trading	0	0	1	0	#NULL!	#NULL!	#NULL!	#NULL!	#NULL!	#NULL!	#NULL!	1	0	8	0	1	#NULL!	#NULL!	0	3	#NULL!	0	1	#NULL!	0	1	1	#NULL!	#NULL!	1
164	1	5	#NULL!	2	1	#NULL!	#NULL!	1	0	2	0	0	0		0		#NULL!	1		0	0	#NULL!	4	#NULL!	#NULL!	#NULL!	#NULL!	#NULL!	#NULL!	0	1	1	3	0	1	#NULL!	0	0	#NULL!	#NULL!	0	#NULL!	#NULL!	0	#NULL!	#NULL!	#NULL!	#NULL!	1
165	1	0	37	2	0	2.97	1	1	2	5	0	0	0		0		#NULL!	2		1	0	1	4	#NULL!	#NULL!	#NULL!	#NULL!	#NULL!	#NULL!	0	1	1	4	0	1	#NULL!	0	0	3	1	0	#NULL!	#NULL!	0	#NULL!	1	#NULL!	#NULL!	1
166	1	0	31	2	0	1.37	#NULL!	2	0	1	0	#NULL!	0		0		#NULL!	1		0	0	#NULL!	4	#NULL!	#NULL!	#NULL!	#NULL!	#NULL!	#NULL!	#NULL!	1	1	24	0	1	#NULL!	#NULL!	0	1	0	#NULL!	1	#NULL!	0	1	1	#NULL!	#NULL!	1
167	0	0	99	2	0	2.79	1	1	0	3	3	0	0		0		30	1		0	0	1	4	#NULL!	#NULL!	#NULL!	#NULL!	#NULL!	#NULL!	#NULL!	1	1	5	0	1	#NULL!	0	0	3	0	1	#NULL!	#NULL!	0	#NULL!	1	#NULL!	#NULL!	1
168	1	0	#NULL!	2	0	2.17	#NULL!	1	2	1	0	0	0		0		#NULL!	1		0	0	#NULL!	#NULL!	#NULL!	#NULL!	#NULL!	#NULL!	#NULL!	#NULL!	#NULL!	1	#NULL!	5	0	1	#NULL!	0	0	2	1	0	2	#NULL!	0	#NULL!	1	#NULL!	#NULL!	1
169	1	0	#NULL!	2	0	2.24	1	2	2	1	0	#NULL!	0		0		#NULL!	1		0	0	2	#NULL!	#NULL!	#NULL!	#NULL!	#NULL!	#NULL!	#NULL!	#NULL!	1	#NULL!	4	0	1	#NULL!	0	0	2	0	0	#NULL!	#NULL!	0	#NULL!	#NULL!	#NULL!	#NULL!	1
170	1	0	#NULL!	2	0	1.9	2	2	2	1	0	0	0		0		#NULL!	1		0	0	2	#NULL!	#NULL!	#NULL!	#NULL!	#NULL!	#NULL!	#NULL!	#NULL!	1	#NULL!	4	0	1	#NULL!	0	0	2	1	0	2	#NULL!	0	2	1	#NULL!	#NULL!	1
171	1	0	99	2	1	2.98	4	2	2	3	3	0	0		0		32	1		1	0	4	#NULL!	#NULL!	#NULL!	#NULL!	#NULL!	#NULL!	#NULL!	1	1	#NULL!	8	0	1	#NULL!	#NULL!	0	3	#NULL!	0	#NULL!	#NULL!	0	#NULL!	#NULL!	#NULL!	#NULL!	1
172	1	0	99	2	0	2.862	2	1	0	3	3	0	0		0	nnj	#NULL!	1		0	0	2	4	#NULL!	#NULL!	#NULL!	#NULL!	#NULL!	#NULL!	0	1	#NULL!	7	0	1	#NULL!	#NULL!	0	3	0	0	3	#NULL!	0	3	1	#NULL!	#NULL!	1
173	1	2	99	2	0	2.5	#NULL!	2	2	4	0	0	0		0	nnj	#NULL!	#NULL!		0	0	#NULL!	#NULL!	#NULL!	#NULL!	#NULL!	#NULL!	#NULL!	#NULL!	#NULL!	1	#NULL!	2	0	1	#NULL!	0	0	2	#NULL!	0	#NULL!	#NULL!	0	#NULL!	#NULL!	#NULL!	#NULL!	1
174	1	0	#NULL!	2	0	2.7	#NULL!	2	2	3	2	0	0		0		#NULL!	1		0	3	#NULL!	#NULL!	#NULL!	#NULL!	#NULL!	#NULL!	#NULL!	#NULL!	#NULL!	1	#NULL!	2	0	1	#NULL!	#NULL!	0	3	1	0	4	#NULL!	0	5	1	#NULL!	#NULL!	1
175	0	0	#NULL!	2	0	2.48	#NULL!	2	2	3	2	0	0		0		#NULL!	1		0	3	#NULL!	#NULL!	#NULL!	#NULL!	#NULL!	#NULL!	#NULL!	#NULL!	#NULL!	1	#NULL!	2	0	1	#NULL!	#NULL!	0	2	0	0	1	1	0	1	0	#NULL!	#NULL!	1
176	1	4	40	2	0	3.45	#NULL!	1	2	4	0	0	0		0		#NULL!	1		0	0	#NULL!	4	#NULL!	#NULL!	#NULL!	#NULL!	#NULL!	#NULL!	0	1	1	2	0	1	#NULL!	0	0	3	#NULL!	0	#NULL!	#NULL!	0	#NULL!	1	#NULL!	#NULL!	1
177	1	3	99	2	0	2.704	2	1	2	2	0	0	0		0		#NULL!	2		0	3	2	4	#NULL!	#NULL!	#NULL!	#NULL!	#NULL!	#NULL!	0	1	1	3	0	1	#NULL!	0	0	3	0	0	1	#NULL!	0	1	1	#NULL!	#NULL!	1
178	1	3	99	3	0	2.498	4	1	2	2	0	0	0		0	sepsis	29	2		1	0	4	4	#NULL!	#NULL!	#NULL!	#NULL!	#NULL!	#NULL!	0	#NULL!	1	7	0	1	#NULL!	0	0	2	1	0	#NULL!	#NULL!	0	#NULL!	1	#NULL!	#NULL!	1
179	1	3	37	3	1	1.918	1	1	0	4	0	0	0		0	nnj	#NULL!	2		0	0	1	1	0	0	#NULL!	#NULL!	1	#NULL!	1	#NULL!	1	6	0	1	#NULL!	#NULL!	0	2	0	0	1	3	0	1	1	#NULL!	#NULL!	1
180	0	0	35	3	0	2.42	1	1	0	7	0	0	1	down's syndrome	0	sepsis and nnj	41	1		0	0	1	4	#NULL!	#NULL!	#NULL!	#NULL!	#NULL!	#NULL!	0	1	1	10	0	1	#NULL!	#NULL!	1	2	0	0	3	1	0	3	1	0	0	1
181	1	14	99	3	1	#NULL!	3	1	0	4	0	0	0		0		25	2		0	0	3	4	#NULL!	#NULL!	#NULL!	#NULL!	#NULL!	#NULL!	0	1	1	9	0	1	#NULL!	#NULL!	0	#NULL!	#NULL!	0	#NULL!	#NULL!	0	#NULL!	#NULL!	#NULL!	#NULL!	1
182	0	13	99	3	1	#NULL!	2	1	0	4	0	1	0		0	malnutrition	#NULL!	1		0	1	2	0	#NULL!	#NULL!	#NULL!	#NULL!	#NULL!	#NULL!	0	1	0	10	0	1	#NULL!	#NULL!	0	#NULL!	#NULL!	0	1	#NULL!	0	2	#NULL!	#NULL!	#NULL!	1
183	1	6	99	3	0	2.4	3	2	0	4	0	0	0		0	nnj	#NULL!	1	teaching	0	0	3	4	#NULL!	#NULL!	#NULL!	#NULL!	#NULL!	#NULL!	0	1	1	6	0	1	#NULL!	0	0	2	#NULL!	0	2	#NULL!	0	2	#NULL!	#NULL!	#NULL!	1
184	0	4	#NULL!	3	1	#NULL!	5	1	0	2	0	1	0		0		#NULL!	#NULL!		#NULL!	#NULL!	4	4	#NULL!	#NULL!	#NULL!	#NULL!	#NULL!	#NULL!	0	#NULL!	1	2	0	1	#NULL!	#NULL!	0	#NULL!	0	0	4	4	0	4	#NULL!	#NULL!	#NULL!	1
185	1	0	40	3	#NULL!	4.5	3	1	2	6	0	0	0		0		#NULL!	1		0	0	3	#NULL!	#NULL!	#NULL!	#NULL!	#NULL!	#NULL!	#NULL!	#NULL!	#NULL!	#NULL!	1	0	1	#NULL!	#NULL!	0	4	0	0	2	#NULL!	0	2	1	#NULL!	#NULL!	1
186	0	0	36	3	0	2	1	1	2	1	0	0	0		0		#NULL!	2		0	0	1	#NULL!	#NULL!	#NULL!	#NULL!	#NULL!	#NULL!	#NULL!	#NULL!	#NULL!	#NULL!	3	0	1	#NULL!	#NULL!	0	2	0	0	#NULL!	#NULL!	0	#NULL!	#NULL!	#NULL!	#NULL!	1
187	1	1	32	3	0	1.908	2	1	0	1	0	0	0		0		#NULL!	2		0	1	2	0	#NULL!	#NULL!	#NULL!	#NULL!	#NULL!	#NULL!	0	1	0	5	0	1	#NULL!	#NULL!	0	2	#NULL!	0	#NULL!	#NULL!	2	#NULL!	#NULL!	#NULL!	#NULL!	1
188	0	2	99	3	0	2.978	1	1	0	2	0	0	0		0		#NULL!	1		0	0	1	4	#NULL!	#NULL!	#NULL!	#NULL!	#NULL!	#NULL!	0	1	1	2	0	1	#NULL!	#NULL!	0	3	#NULL!	0	#NULL!	#NULL!	2	#NULL!	#NULL!	#NULL!	#NULL!	1
189	1	4	99	3	1	#NULL!	3	2	0	4	0	1	0		0		#NULL!	2		1	0	2	4	#NULL!	#NULL!	#NULL!	#NULL!	#NULL!	#NULL!	#NULL!	1	1	5	0	1	#NULL!	#NULL!	0	#NULL!	0	0	#NULL!	#NULL!	0	#NULL!	1	#NULL!	#NULL!	1
190	1	3	99	3	0	3.41	1	1	2	2	2	0	0		0		36	1		0	0	1	4	#NULL!	#NULL!	#NULL!	#NULL!	#NULL!	#NULL!	0	#NULL!	1	4	0	1	#NULL!	0	0	3	0	0	2	#NULL!	2	2	1	#NULL!	#NULL!	1
191	1	4	#NULL!	3	1	2.4	1	1	0	2	0	1	0		0	sepsis	25	1		0	0	1	4	#NULL!	#NULL!	#NULL!	#NULL!	#NULL!	#NULL!	0	1	1	10	0	1	#NULL!	#NULL!	0	2	0	0	4	3	0	4	1	#NULL!	#NULL!	1
192	1	#NULL!	40	3	0	4	#NULL!	1	2	6	0	0	0		0		#NULL!	1		0	0	#NULL!	#NULL!	#NULL!	#NULL!	#NULL!	#NULL!	1	#NULL!	#NULL!	#NULL!	#NULL!	1	0	1	#NULL!	#NULL!	0	3	0	0	1	#NULL!	0	1	1	#NULL!	#NULL!	1
193	1	0	32	3	0	2.386	#NULL!	1	2	1	0	0	0		0	nnj	#NULL!	1		0	0	#NULL!	#NULL!	#NULL!	#NULL!	#NULL!	#NULL!	#NULL!	#NULL!	#NULL!	1	#NULL!	7	0	1	#NULL!	#NULL!	0	2	1	0	1	6	0	1	1	#NULL!	#NULL!	1
194	1	14	37	2	1	2.9	1	1	0	2	0	0	0		0		#NULL!	2		0	0	1	4	#NULL!	#NULL!	#NULL!	#NULL!	#NULL!	#NULL!	0	1	1	2	0	1	#NULL!	0	0	3	0	1	3	1	0	3	1	#NULL!	#NULL!	1
195	0	1	99	3	1	3.18	6	1	0	7	0	0	1	congenital ectropion	0		35	2		1	0	6	#NULL!	#NULL!	#NULL!	#NULL!	#NULL!	#NULL!	#NULL!	#NULL!	1	#NULL!	4	0	3	#NULL!	#NULL!	0	3	0	0	4	5	0	5	1	1	0	1
196	1	0	99	3	0	4.65	#NULL!	1	2	6	0	0	0		0		#NULL!	1		1	0	#NULL!	4	#NULL!	#NULL!	#NULL!	#NULL!	#NULL!	#NULL!	#NULL!	1	1	2	0	1	#NULL!	#NULL!	0	4	0	1	2	#NULL!	1	2	0	#NULL!	#NULL!	1
197	1	11	28	2	1	#NULL!	#NULL!	1	0	1	0	0	0		0	sepsis	#NULL!	1		1	0	#NULL!	4	#NULL!	#NULL!	#NULL!	#NULL!	#NULL!	#NULL!	0	1	#NULL!	8	0	1	#NULL!	#NULL!	0	#NULL!	0	0	3	#NULL!	0	3	1	#NULL!	#NULL!	1
198	1	0	99	2	0	5.2	#NULL!	1	2	6	0	0	0		0		#NULL!	2		0	0	#NULL!	#NULL!	#NULL!	#NULL!	#NULL!	#NULL!	#NULL!	#NULL!	#NULL!	1	#NULL!	2	0	1	#NULL!	0	0	4	#NULL!	0	4	#NULL!	#NULL!	4	1	#NULL!	#NULL!	1
199	0	0	99	2	0	1.75	2	1	2	11	0	0	0		0		#NULL!	1		0	0	2	4	#NULL!	#NULL!	#NULL!	#NULL!	1	#NULL!	0	1	1	7	0	1	#NULL!	#NULL!	0	2	0	0	3	#NULL!	0	3	#NULL!	#NULL!	#NULL!	1
200	1	1	99	2	1	3.12	2	1	0	3	2	0	0		0		25	1		0	0	2	4	#NULL!	#NULL!	#NULL!	#NULL!	#NULL!	#NULL!	0	1	#NULL!	6	0	1	#NULL!	0	0	3	1	0	1	#NULL!	0	1	#NULL!	#NULL!	#NULL!	1
201	0	20	99	2	1	#NULL!	#NULL!	1	0	4	0	1	0		0		#NULL!	1		0	0	#NULL!	#NULL!	#NULL!	#NULL!	#NULL!	#NULL!	#NULL!	#NULL!	#NULL!	1	#NULL!	5	0	1	#NULL!	#NULL!	0	#NULL!	1	0	2	#NULL!	1	2	0	#NULL!	#NULL!	1
202	1	2	99	2	1	2.78	1	1	0	3	2	#NULL!	0		0	sepsis	#NULL!	2		1	0	1	0	#NULL!	#NULL!	#NULL!	#NULL!	#NULL!	#NULL!	0	1	#NULL!	6	0	1	#NULL!	#NULL!	0	3	0	0	1	#NULL!	0	1	1	#NULL!	#NULL!	1
203	1	2	99	2	0	3.47	2	1	2	4	0	#NULL!	0		0		#NULL!	1		0	1	2	4	#NULL!	#NULL!	#NULL!	#NULL!	#NULL!	#NULL!	0	1	1	3	0	1	#NULL!	0	0	3	0	0	3	#NULL!	0	2	1	#NULL!	#NULL!	1
204	0	1	99	2	1	2.74	5	1	0	7	3	0	1	down's syndrome and VSD	0	sepsis	39	2		0	1	5	#NULL!	#NULL!	#NULL!	#NULL!	#NULL!	#NULL!	#NULL!	#NULL!	1	#NULL!	2	0	2	#NULL!	#NULL!	1	3	0	0	#NULL!	#NULL!	0	#NULL!	#NULL!	#NULL!	#NULL!	1
205	1	1	99	2	1	2.25	2	1	0	4	0	0	0		0		34	2		0	0	2	#NULL!	#NULL!	#NULL!	#NULL!	#NULL!	#NULL!	#NULL!	#NULL!	1	#NULL!	2	0	2	#NULL!	0	0	2	0	0	1	5	0	1	1	#NULL!	#NULL!	1
206	0	9	99	2	1	2.03	7	2	0	4	0	1	0		0		#NULL!	1		1	2	7	0	#NULL!	#NULL!	#NULL!	#NULL!	#NULL!	#NULL!	#NULL!	1	0	6	0	2	#NULL!	#NULL!	0	2	#NULL!	0	1	1	0	1	1	#NULL!	#NULL!	1
207	1	7	99	2	0	3.25	#NULL!	1	2	2	0	0	0		0		#NULL!	1		0	0	#NULL!	4	#NULL!	#NULL!	#NULL!	#NULL!	#NULL!	#NULL!	#NULL!	1	1	3	0	1	#NULL!	#NULL!	0	3	0	#NULL!	#NULL!	#NULL!	0	#NULL!	#NULL!	#NULL!	#NULL!	1
208	0	1	99	2	0	2.66	2	1	0	4	0	0	0		0		#NULL!	1		0	0	2	4	#NULL!	#NULL!	#NULL!	#NULL!	#NULL!	#NULL!	#NULL!	1	1	4	0	1	#NULL!	#NULL!	0	3	1	0	#NULL!	#NULL!	0	#NULL!	#NULL!	#NULL!	#NULL!	1
209	1	1	99	2	1	3.39	2	1	0	4	3	0	0		0		#NULL!	1		1	0	2	2	#NULL!	#NULL!	#NULL!	#NULL!	#NULL!	#NULL!	1	1	#NULL!	5	0	1	#NULL!	#NULL!	0	3	0	1	1	#NULL!	0	1	1	#NULL!	#NULL!	1
210	1	0	99	3	0	3.04	1	1	0	3	1	0	0		0		#NULL!	1		0	0	1	#NULL!	#NULL!	#NULL!	#NULL!	#NULL!	#NULL!	#NULL!	#NULL!	1	#NULL!	1	0	1	#NULL!	#NULL!	0	3	0	0	4	4	0	6	#NULL!	#NULL!	#NULL!	0
211	0	0	99	3	0	4.13	1	1	0	6	0	0	0		0		#NULL!	1		0	0	1	4	#NULL!	#NULL!	#NULL!	#NULL!	#NULL!	#NULL!	#NULL!	1	1	1	0	1	#NULL!	#NULL!	0	4	0	0	#NULL!	#NULL!	0	#NULL!	1	#NULL!	#NULL!	1
212	1	4	99	2	1	3.4	#NULL!	1	0	2	0	#NULL!	0		0		#NULL!	1		0	0	#NULL!	#NULL!	#NULL!	#NULL!	#NULL!	#NULL!	#NULL!	#NULL!	#NULL!	1	#NULL!	3	0	1	#NULL!	#NULL!	0	3	1	1	#NULL!	#NULL!	0	#NULL!	1	#NULL!	#NULL!	1
213	1	0	99	2	0	2.29	2	2	0	2	0	0	0		0		#NULL!	1		0	0	#NULL!	#NULL!	#NULL!	#NULL!	#NULL!	#NULL!	#NULL!	#NULL!	#NULL!	1	#NULL!	4	0	1	#NULL!	0	0	2	0	0	#NULL!	#NULL!	0	#NULL!	#NULL!	#NULL!	#NULL!	1
214	1	0	30	2	1	1.4	3	2	2	1	0	0	0		0		#NULL!	2		1	0	3	#NULL!	#NULL!	#NULL!	#NULL!	#NULL!	#NULL!	#NULL!	#NULL!	1	#NULL!	21	0	1	#NULL!	0	0	1	0	0	2	#NULL!	0	2	1	#NULL!	#NULL!	1
215	0	2	99	2	0	3.74	2	1	0	4	0	0	0		0		#NULL!	1		0	0	2	#NULL!	#NULL!	#NULL!	#NULL!	#NULL!	#NULL!	#NULL!	#NULL!	1	#NULL!	4	0	1	#NULL!	0	0	3	0	0	2	1	0	2	1	#NULL!	#NULL!	1
216	0	0	99	2	0	3.4	3	1	2	3	2	0	0		0		#NULL!	1		0	0	3	#NULL!	#NULL!	#NULL!	#NULL!	#NULL!	#NULL!	#NULL!	#NULL!	1	#NULL!	6	0	1	#NULL!	#NULL!	0	3	0	1	#NULL!	#NULL!	0	#NULL!	#NULL!	#NULL!	#NULL!	1
217	1	2	99	2	1	1.48	1	1	0	3	2	1	0		0		#NULL!	2		0	0	1	0	#NULL!	#NULL!	3	#NULL!	#NULL!	#NULL!	#NULL!	1	0	15	0	1	#NULL!	#NULL!	0	1	0	0	1	#NULL!	0	1	0	#NULL!	#NULL!	1
218	0	1	32	2	1	1.9	5	1	2	1	0	0	0		0	HDN	#NULL!	1		1	0	5	#NULL!	#NULL!	#NULL!	#NULL!	#NULL!	#NULL!	#NULL!	#NULL!	1	#NULL!	14	0	1	#NULL!	0	0	2	0	0	2	#NULL!	1	2	1	#NULL!	#NULL!	1
219	1	2	99	2	1	2.2	3	1	0	7	3	0	1	congenital cataract	0	sepsis	#NULL!	2		0	0	3	2	#NULL!	#NULL!	2	#NULL!	#NULL!	#NULL!	0	1	1	6	0	1	#NULL!	0	0	2	#NULL!	0	2	#NULL!	0	2	1	1	0	1
220	0	0	99	2	0	3.03	1	1	0	13	0	0	0		0		#NULL!	1		0	0	1	#NULL!	#NULL!	#NULL!	#NULL!	#NULL!	#NULL!	#NULL!	#NULL!	1	#NULL!	2	0	1	#NULL!	#NULL!	0	3	0	0	4	5	1	5	#NULL!	#NULL!	#NULL!	0
221	1	0	99	2	0	3.05	2	1	2	4	0	0	0		0		22	1		1	0	2	1	#NULL!	#NULL!	1	#NULL!	#NULL!	#NULL!	0	1	1	2	0	1	#NULL!	#NULL!	0	3	0	0	2	4	0	2	#NULL!	#NULL!	#NULL!	0
222	1	0	99	2	0	3.1	2	1	2	4	0	0	0		0	sepsis	#NULL!	1		0	0	2	4	#NULL!	#NULL!	#NULL!	#NULL!	#NULL!	#NULL!	1	1	#NULL!	3	0	1	#NULL!	#NULL!	0	3	0	1	4	#NULL!	2	6	0	#NULL!	#NULL!	0
223	1	2	99	2	0	3.5	1	1	2	2	0	0	0		0		28	1		1	0	1	2	#NULL!	#NULL!	2	0	#NULL!	#NULL!	0	1	1	4	0	1	#NULL!	#NULL!	0	3	0	0	#NULL!	#NULL!	0	#NULL!	1	#NULL!	#NULL!	1
224	0	1	99	2	0	4.2	2	1	2	6	0	0	0		0		#NULL!	1		0	0	2	2	#NULL!	#NULL!	2	#NULL!	#NULL!	#NULL!	0	1	1	5	0	1	#NULL!	0	0	4	0	0	2	#NULL!	0	2	1	#NULL!	#NULL!	1
225	1	2	99	2	0	2.39	3	1	2	7	0	0	1	down's syndrome	0		#NULL!	1		0	0	3	4	#NULL!	#NULL!	#NULL!	#NULL!	#NULL!	#NULL!	0	1	1	4	0	1	#NULL!	#NULL!	1	2	#NULL!	0	2	3	0	2	1	1	0	1
226	0	11	99	2	1	#NULL!	2	2	0	4	0	0	0		0	severe anaemia	#NULL!	1		0	0	#NULL!	#NULL!	#NULL!	#NULL!	#NULL!	#NULL!	#NULL!	#NULL!	#NULL!	1	#NULL!	10	0	1	#NULL!	#NULL!	0	#NULL!	0	0	2	#NULL!	0	2	1	#NULL!	#NULL!	1
227	1	4	99	2	1	#NULL!	1	#NULL!	0	2	0	0	0		0	sepsis	28	2		0	0	1	#NULL!	#NULL!	#NULL!	#NULL!	#NULL!	#NULL!	#NULL!	#NULL!	1	#NULL!	6	0	1	#NULL!	#NULL!	0	#NULL!	0	0	1	#NULL!	0	1	#NULL!	#NULL!	#NULL!	1
228	0	1	99	2	1	3	#NULL!	#NULL!	0	7	2	#NULL!	1	CHD	0	sepsis	#NULL!	2		0	0	#NULL!	4	#NULL!	#NULL!	#NULL!	#NULL!	#NULL!	#NULL!	#NULL!	1	1	11	0	1	#NULL!	#NULL!	1	3	#NULL!	1	2	3	0	2	1	1	0	1
229	1	3	99	2	0	2.6	1	1	0	2	0	#NULL!	0		0		#NULL!	1		0	0	1	4	#NULL!	#NULL!	#NULL!	#NULL!	#NULL!	#NULL!	0	1	1	3	0	1	#NULL!	0	0	3	0	0	1	#NULL!	0	1	1	#NULL!	#NULL!	1
230	0	0	99	2	0	2.68	#NULL!	1	2	0	0	0	0		0		#NULL!	1		0	1	#NULL!	#NULL!	#NULL!	#NULL!	#NULL!	#NULL!	#NULL!	#NULL!	#NULL!	1	#NULL!	2	0	1	#NULL!	#NULL!	0	3	0	0	#NULL!	#NULL!	0	#NULL!	#NULL!	#NULL!	#NULL!	1
231	1	0	#NULL!	2	0	2.88	2	1	2	7	#NULL!	0	1	cleft palate, undescended testes, microcephaly, ab	0		#NULL!	1		0	0	2	#NULL!	#NULL!	#NULL!	#NULL!	#NULL!	0	#NULL!	0	1	#NULL!	2	0	2	#NULL!	#NULL!	1	3	#NULL!	0	2	4	0	2	1	#NULL!	#NULL!	1
232	1	1	99	2	0	3.12	1	1	2	4	0	0	0		0		#NULL!	1		0	0	1	4	#NULL!	#NULL!	#NULL!	#NULL!	#NULL!	#NULL!	#NULL!	1	1	2	0	1	#NULL!	#NULL!	0	3	0	0	2	#NULL!	0	#NULL!	#NULL!	#NULL!	#NULL!	1
233	0	0	99	2	1	2.6	#NULL!	1	2	4	0	0	0		0		#NULL!	1		0	0	#NULL!	#NULL!	#NULL!	#NULL!	#NULL!	#NULL!	#NULL!	#NULL!	#NULL!	1	#NULL!	3	0	1	#NULL!	0	0	3	1	0	3	#NULL!	0	3	#NULL!	#NULL!	#NULL!	1
234	1	0	99	2	1	2.78	#NULL!	1	0	3	2	0	0		0		#NULL!	1		#NULL!	0	#NULL!	#NULL!	#NULL!	#NULL!	#NULL!	#NULL!	#NULL!	#NULL!	#NULL!	1	#NULL!	2	0	1	#NULL!	#NULL!	0	3	0	0	2	#NULL!	0	2	#NULL!	#NULL!	#NULL!	1
235	0	22	99	2	#NULL!	#NULL!	#NULL!	1	0	4	0	#NULL!	0		0		#NULL!	1		0	0	#NULL!	#NULL!	#NULL!	#NULL!	#NULL!	#NULL!	#NULL!	#NULL!	#NULL!	1	#NULL!	4	0	1	#NULL!	#NULL!	0	#NULL!	0	0	3	#NULL!	0	3	#NULL!	#NULL!	#NULL!	1
236	1	0	33	2	1	1.148	1	2	0	1	0	0	0		0	sepsis	#NULL!	1		0	0	2	2	#NULL!	#NULL!	#NULL!	#NULL!	#NULL!	#NULL!	#NULL!	1	1	15	0	1	#NULL!	0	0	1	0	0	1	#NULL!	0	1	0	2	1	1
237	1	2	99	2	0	3	#NULL!	1	0	2	0	0	0		0		#NULL!	1		1	0	#NULL!	#NULL!	#NULL!	#NULL!	#NULL!	#NULL!	#NULL!	#NULL!	#NULL!	1	#NULL!	5	0	2	#NULL!	#NULL!	0	3	1	0	4	#NULL!	0	5	#NULL!	#NULL!	#NULL!	1
238	1	13	99	2	1	#NULL!	2	1	0	2	0	0	0		0	sepsis	#NULL!	1		1	0	2	4	#NULL!	#NULL!	#NULL!	#NULL!	#NULL!	#NULL!	1	1	#NULL!	5	0	1	#NULL!	#NULL!	0	#NULL!	0	0	3	#NULL!	0	3	1	1	0	1
239	1	5	99	2	0	#NULL!	2	1	2	2	0	0	0		0		#NULL!	2		1	0	2	#NULL!	#NULL!	#NULL!	#NULL!	#NULL!	#NULL!	#NULL!	#NULL!	1	#NULL!	3	0	1	#NULL!	0	0	#NULL!	0	0	1	#NULL!	0	1	#NULL!	#NULL!	#NULL!	1
240	0	2	99	2	1	2.6	1	1	2	12	0	0	0		0	sepsis	27	1		0	0	1	4	#NULL!	#NULL!	#NULL!	#NULL!	#NULL!	#NULL!	1	1	1	4	0	1	#NULL!	0	0	3	0	0	2	1	0	2	1	0	0	1
241	1	0	99	2	0	3.55	2	1	0	3	2	0	0		0	sepsis	#NULL!	1		0	0	2	4	#NULL!	#NULL!	#NULL!	#NULL!	#NULL!	#NULL!	1	1	1	3	0	1	#NULL!	0	0	3	0	0	2	#NULL!	0	2	1	#NULL!	#NULL!	1
242	1	6	99	2	1	#NULL!	2	1	0	2	0	0	0		0	sepsis	#NULL!	1		1	0	2	4	#NULL!	#NULL!	#NULL!	#NULL!	#NULL!	#NULL!	0	1	#NULL!	6	0	1	#NULL!	#NULL!	0	#NULL!	0	0	1	3	0	1	1	1	0	1
243	1	2	99	2	0	#NULL!	#NULL!	1	0	2	0	0	0		0		#NULL!	1		1	0	#NULL!	#NULL!	#NULL!	#NULL!	#NULL!	#NULL!	#NULL!	#NULL!	#NULL!	1	#NULL!	1	0	1	#NULL!	0	0	#NULL!	0	0	2	#NULL!	0	2	1	1	0	1
244	0	0	99	2	0	2.83	#NULL!	#NULL!	0	4	0	0	0		0		#NULL!	1		0	0	#NULL!	#NULL!	#NULL!	#NULL!	#NULL!	#NULL!	#NULL!	#NULL!	#NULL!	1	#NULL!	4	0	1	#NULL!	#NULL!	0	3	0	0	3	#NULL!	0	3	1	#NULL!	#NULL!	1
245	0	4	#NULL!	2	0	#NULL!	5	1	0	2	0	0	0		0		#NULL!	1		0	0	5	4	#NULL!	#NULL!	#NULL!	#NULL!	#NULL!	#NULL!	1	1	1	4	0	1	#NULL!	#NULL!	0	#NULL!	0	1	2	#NULL!	0	#NULL!	#NULL!	#NULL!	#NULL!	1
246	1	3	99	2	1	3.13	4	1	0	7	0	0	1	omphalocoele and macroglossia	0	nnj	#NULL!	2		1	0	4	4	#NULL!	#NULL!	#NULL!	#NULL!	#NULL!	#NULL!	1	1	#NULL!	7	0	1	#NULL!	#NULL!	1	3	#NULL!	0	1	5	0	1	1	1	0	1
247	0	0	99	2	1	3.3	3	1	0	3	2	0	0		0		#NULL!	1		0	0	3	#NULL!	#NULL!	#NULL!	#NULL!	#NULL!	#NULL!	#NULL!	#NULL!	1	#NULL!	2	0	1	#NULL!	#NULL!	0	3	0	0	1	3	0	1	#NULL!	#NULL!	#NULL!	1
248	1	0	99	2	1	3.08	1	1	0	3	2	0	0		0		18	1		0	0	1	#NULL!	#NULL!	#NULL!	#NULL!	#NULL!	#NULL!	#NULL!	#NULL!	0	#NULL!	13	0	1	#NULL!	0	0	3	0	0	#NULL!	#NULL!	0	#NULL!	1	#NULL!	#NULL!	1
249	1	3	99	2	1	3.57	#NULL!	1	0	3	3	1	0		0		#NULL!	1		0	0	#NULL!	#NULL!	#NULL!	#NULL!	#NULL!	#NULL!	#NULL!	#NULL!	#NULL!	#NULL!	#NULL!	9	0	1	#NULL!	#NULL!	0	3	0	0	1	#NULL!	0	1	1	#NULL!	#NULL!	1
250	1	0	99	2	1	2.96	4	1	0	3	2	0	0		0		#NULL!	1		0	0	4	4	#NULL!	#NULL!	#NULL!	#NULL!	#NULL!	#NULL!	#NULL!	1	#NULL!	3	0	1	#NULL!	0	0	3	0	0	#NULL!	#NULL!	1	#NULL!	#NULL!	#NULL!	#NULL!	1
251	0	8	99	2	1	#NULL!	1	1	0	2	0	0	0		0	sepsis	#NULL!	1		0	0	1	#NULL!	#NULL!	#NULL!	#NULL!	#NULL!	#NULL!	#NULL!	0	1	#NULL!	14	0	1	#NULL!	0	0	#NULL!	#NULL!	0	2	#NULL!	0	2	#NULL!	#NULL!	#NULL!	0
252	0	0	0	2	0	1.67	3	1	0	1	0	0	0		0	nnj	#NULL!	2		0	0	3	#NULL!	#NULL!	#NULL!	#NULL!	#NULL!	#NULL!	#NULL!	#NULL!	1	#NULL!	6	0	1	#NULL!	#NULL!	0	2	0	0	1	#NULL!	0	1	1	#NULL!	#NULL!	1
253	1	0	28	2	0	1.098	4	1	0	1	0	0	0		0		#NULL!	1		1	2	4	#NULL!	#NULL!	#NULL!	#NULL!	#NULL!	#NULL!	#NULL!	#NULL!	1	#NULL!	36	0	1	#NULL!	#NULL!	0	1	0	0	#NULL!	#NULL!	0	#NULL!	#NULL!	#NULL!	#NULL!	1
254	0	16	#NULL!	2	1	#NULL!	1	2	0	2	0	0	0		0	sepsis	#NULL!	1		0	0	2	#NULL!	#NULL!	#NULL!	#NULL!	#NULL!	#NULL!	#NULL!	1	1	#NULL!	1	1	4	16	1	0	#NULL!	0	0	#NULL!	#NULL!	0	#NULL!	#NULL!	#NULL!	#NULL!	1
255	1	16	#NULL!	2	1	#NULL!	2	2	0	4	0	0	0		0		#NULL!	1		0	0	2	#NULL!	#NULL!	#NULL!	#NULL!	#NULL!	#NULL!	#NULL!	#NULL!	1	#NULL!	2	0	1	#NULL!	#NULL!	0	#NULL!	0	1	#NULL!	#NULL!	0	#NULL!	#NULL!	#NULL!	#NULL!	1
256	1	2	99	2	1	3	2	1	0	4	0	0	0		0		#NULL!	1		0	0	2	#NULL!	#NULL!	#NULL!	#NULL!	#NULL!	#NULL!	#NULL!	0	1	#NULL!	3	0	1	#NULL!	#NULL!	0	3	1	0	1	#NULL!	0	2	1	#NULL!	#NULL!	1
257	1	0	28	2	0	1.12	3	1	2	1	0	0	0		0	sepsis	#NULL!	1		0	0	3	4	#NULL!	#NULL!	#NULL!	#NULL!	#NULL!	#NULL!	0	1	1	40	0	1	#NULL!	0	0	1	0	0	#NULL!	#NULL!	0	#NULL!	#NULL!	#NULL!	#NULL!	0
258	0	0	99	3	0	2.15	1	1	2	1	0	0	0		0	sepsis	#NULL!	2		0	0	1	4	#NULL!	#NULL!	#NULL!	#NULL!	#NULL!	#NULL!	0	1	1	5	0	1	#NULL!	#NULL!	0	2	0	1	2	#NULL!	0	2	1	#NULL!	#NULL!	1
259	1	1	30	3	1	1.64	6	2	0	3	3	0	0		0	sepsis	#NULL!	1		1	0	6	#NULL!	#NULL!	#NULL!	#NULL!	#NULL!	#NULL!	#NULL!	1	1	#NULL!	8	0	1	#NULL!	#NULL!	0	2	0	0	2	#NULL!	0	2	#NULL!	#NULL!	#NULL!	1
260	1	19	99	3	0	#NULL!	#NULL!	1	0	12	0	0	0		0		#NULL!	1		0	0	#NULL!	#NULL!	#NULL!	#NULL!	#NULL!	#NULL!	#NULL!	#NULL!	#NULL!	1	#NULL!	3	0	1	#NULL!	#NULL!	0	#NULL!	0	0	1	3	0	1	1	#NULL!	#NULL!	1
261	0	0	27	3	0	1.37	1	1	0	1	0	0	0		0	sepsis	#NULL!	2		1	0	1	4	#NULL!	#NULL!	#NULL!	#NULL!	#NULL!	#NULL!	0	1	#NULL!	47	0	1	#NULL!	#NULL!	0	1	0	0	2	#NULL!	0	2	1	#NULL!	#NULL!	1
262	0	14	#NULL!	3	1	#NULL!	#NULL!	1	0	4	0	0	0		0		#NULL!	1		0	0	#NULL!	4	#NULL!	#NULL!	#NULL!	#NULL!	#NULL!	#NULL!	0	1	#NULL!	5	0	1	#NULL!	0	0	#NULL!	0	0	2	#NULL!	0	2	1	#NULL!	#NULL!	1
263	1	13	99	3	1	3.93	3	1	0	4	0	1	0		0		#NULL!	1		1	0	#NULL!	#NULL!	#NULL!	#NULL!	#NULL!	#NULL!	#NULL!	#NULL!	#NULL!	1	#NULL!	18	0	1	#NULL!	0	0	3	0	0	#NULL!	#NULL!	0	#NULL!	#NULL!	#NULL!	#NULL!	1
264	1	3	99	3	0	3.3	2	1	0	2	0	0	0		0	sepsis	#NULL!	1		0	0	2	4	#NULL!	#NULL!	#NULL!	#NULL!	#NULL!	#NULL!	#NULL!	1	1	3	0	1	#NULL!	#NULL!	0	3	0	0	#NULL!	#NULL!	0	#NULL!	#NULL!	#NULL!	#NULL!	1
265	0	2	99	3	1	3.3	1	1	0	4	0	0	0		0		#NULL!	1		0	0	1	4	#NULL!	#NULL!	#NULL!	#NULL!	#NULL!	#NULL!	0	1	#NULL!	5	0	1	#NULL!	0	0	3	#NULL!	0	4	#NULL!	0	5	1	#NULL!	#NULL!	1
266	0	0	34	3	0	1.5	1	1	2	1	0	0	0		0		#NULL!	1		0	0	1	4	#NULL!	#NULL!	#NULL!	#NULL!	#NULL!	#NULL!	#NULL!	1	1	28	0	1	#NULL!	#NULL!	0	1	0	0	4	#NULL!	0	4	1	#NULL!	#NULL!	1
267	1	25	99	3	1	#NULL!	#NULL!	#NULL!	#NULL!	14	0	0	0		0		#NULL!	#NULL!		#NULL!	#NULL!	#NULL!	4	#NULL!	#NULL!	#NULL!	#NULL!	#NULL!	#NULL!	0	#NULL!	1	13	0	2	#NULL!	#NULL!	0	#NULL!	0	0	3	#NULL!	0	3	#NULL!	#NULL!	#NULL!	1
268	1	23	99	3	0	#NULL!	#NULL!	1	0	4	0	0	0		0		#NULL!	1		1	0	#NULL!	#NULL!	#NULL!	#NULL!	#NULL!	#NULL!	#NULL!	#NULL!	#NULL!	1	#NULL!	6	0	1	#NULL!	#NULL!	0	#NULL!	0	0	1	2	0	1	#NULL!	#NULL!	#NULL!	1
269	1	5	99	3	0	#NULL!	3	1	0	2	0	0	0		0		#NULL!	1		1	2	3	#NULL!	#NULL!	#NULL!	#NULL!	#NULL!	#NULL!	#NULL!	#NULL!	1	#NULL!	2	0	1	#NULL!	0	0	#NULL!	0	0	#NULL!	#NULL!	0	#NULL!	#NULL!	#NULL!	#NULL!	1
270	0	5	#NULL!	3	0	#NULL!	#NULL!	1	2	2	0	0	0		0		#NULL!	1		1	0	#NULL!	#NULL!	#NULL!	#NULL!	#NULL!	#NULL!	#NULL!	#NULL!	#NULL!	1	#NULL!	4	0	1	#NULL!	#NULL!	0	#NULL!	0	0	4	#NULL!	0	4	1	#NULL!	#NULL!	1
271	1	4	99	3	0	#NULL!	1	1	0	4	0	0	0		0		#NULL!	1		0	0	1	4	#NULL!	#NULL!	#NULL!	#NULL!	#NULL!	#NULL!	#NULL!	1	1	4	0	1	#NULL!	#NULL!	0	#NULL!	0	1	1	#NULL!	0	1	#NULL!	#NULL!	#NULL!	1
272	0	5	99	3	1	1.95	1	1	2	7	0	0	1	down's syndrome	0		27	1		0	0	1	#NULL!	#NULL!	#NULL!	#NULL!	#NULL!	#NULL!	#NULL!	0	1	#NULL!	4	0	1	#NULL!	#NULL!	1	2	1	0	1	4	0	1	1	1	0	1
273	1	4	99	3	0	3.1	#NULL!	1	0	2	0	0	0		0		#NULL!	1		0	0	#NULL!	#NULL!	#NULL!	#NULL!	#NULL!	#NULL!	#NULL!	#NULL!	#NULL!	1	#NULL!	4	0	1	#NULL!	#NULL!	0	3	1	0	3	#NULL!	0	3	#NULL!	#NULL!	#NULL!	1
274	0	0	99	3	0	2.13	3	2	0	3	2	#NULL!	0		0		#NULL!	1		1	0	3	#NULL!	#NULL!	#NULL!	#NULL!	#NULL!	#NULL!	#NULL!	1	1	#NULL!	2	0	1	#NULL!	#NULL!	0	2	1	0	4	#NULL!	2	4	#NULL!	#NULL!	#NULL!	1
275	1	3	99	3	1	2.36	#NULL!	1	0	3	3	0	0		0		#NULL!	1		0	0	#NULL!	#NULL!	#NULL!	#NULL!	#NULL!	#NULL!	#NULL!	#NULL!	#NULL!	1	#NULL!	6	0	1	#NULL!	#NULL!	0	2	#NULL!	1	1	#NULL!	0	2	#NULL!	#NULL!	#NULL!	0
276	0	9	99	3	1	#NULL!	2	1	0	2	0	0	0		0		#NULL!	1		0	0	2	4	#NULL!	#NULL!	#NULL!	#NULL!	#NULL!	#NULL!	#NULL!	1	#NULL!	5	0	2	#NULL!	#NULL!	0	#NULL!	#NULL!	1	2	#NULL!	0	2	#NULL!	#NULL!	#NULL!	1
277	0	0	34	3	0	2.05	2	2	2	1	0	0	0		0		#NULL!	1		1	0	2	#NULL!	#NULL!	#NULL!	#NULL!	#NULL!	#NULL!	#NULL!	#NULL!	1	#NULL!	5	0	1	#NULL!	#NULL!	0	2	0	0	2	#NULL!	0	2	#NULL!	#NULL!	#NULL!	1
278	1	0	34	3	0	2.04	1	2	2	1	0	0	0		0		#NULL!	1		1	0	2	4	#NULL!	#NULL!	#NULL!	#NULL!	#NULL!	#NULL!	#NULL!	1	#NULL!	5	0	1	#NULL!	#NULL!	0	2	1	0	3	#NULL!	0	3	1	#NULL!	#NULL!	1
279	0	0	99	3	0	3.96	#NULL!	1	0	16	2	0	0		0		#NULL!	1		0	0	#NULL!	#NULL!	#NULL!	#NULL!	#NULL!	#NULL!	#NULL!	#NULL!	#NULL!	1	#NULL!	2	0	1	#NULL!	0	0	3	0	0	1	#NULL!	0	1	1	#NULL!	#NULL!	1
280	1	0	32	3	0	1.56	1	1	2	1	0	0	0		0		25	1		0	0	1	#NULL!	#NULL!	#NULL!	#NULL!	#NULL!	#NULL!	#NULL!	#NULL!	1	#NULL!	16	0	1	#NULL!	#NULL!	0	2	1	0	4	#NULL!	0	6	#NULL!	#NULL!	#NULL!	1
281	0	27	99	3	1	#NULL!	2	1	0	14	0	1	0		0		#NULL!	1		0	0	1	#NULL!	#NULL!	#NULL!	#NULL!	#NULL!	#NULL!	#NULL!	#NULL!	1	#NULL!	1	0	2	#NULL!	#NULL!	0	#NULL!	0	1	#NULL!	#NULL!	0	#NULL!	#NULL!	#NULL!	#NULL!	1
282	0	0	99	3	1	4.83	2	1	0	3	2	0	0		0		#NULL!	2		0	0	2	#NULL!	#NULL!	#NULL!	#NULL!	#NULL!	#NULL!	#NULL!	#NULL!	1	#NULL!	3	0	1	#NULL!	#NULL!	0	4	1	0	1	#NULL!	0	1	1	#NULL!	#NULL!	1
283	0	0	36	3	0	1.65	2	1	2	1	0	0	0		0		#NULL!	2		0	0	2	#NULL!	#NULL!	#NULL!	#NULL!	#NULL!	#NULL!	#NULL!	0	1	#NULL!	3	0	1	#NULL!	#NULL!	0	2	#NULL!	1	#NULL!	#NULL!	0	#NULL!	1	#NULL!	#NULL!	1
284	0	0	27	3	1	1.08	1	2	0	1	0	0	0		0	sepsis	30	1		0	0	2	4	#NULL!	#NULL!	#NULL!	#NULL!	#NULL!	#NULL!	#NULL!	1	#NULL!	15	1	4	15	1	0	1	0	1	3	#NULL!	0	#NULL!	#NULL!	#NULL!	#NULL!	1
285	1	0	25	3	1	0.92	3	1	0	1	3	0	0		0		#NULL!	2		0	0	3	#NULL!	#NULL!	#NULL!	#NULL!	#NULL!	#NULL!	#NULL!	#NULL!	1	#NULL!	3	1	4	3	1	0	0	0	0	2	#NULL!	0	2	1	#NULL!	#NULL!	1
286	1	4	99	3	1	#NULL!	2	1	0	3	3	1	0		0		#NULL!	1		1	0	2	0	#NULL!	#NULL!	#NULL!	#NULL!	#NULL!	#NULL!	1	1	0	5	0	1	#NULL!	#NULL!	0	#NULL!	0	0	1	#NULL!	0	1	1	#NULL!	#NULL!	1
287	1	0	30	3	1	1.61	1	1	0	1	0	0	0		0		23	1		0	0	1	4	#NULL!	#NULL!	#NULL!	#NULL!	#NULL!	#NULL!	#NULL!	1	#NULL!	23	0	1	#NULL!	#NULL!	0	2	1	0	1	#NULL!	0	1	1	#NULL!	#NULL!	1
288	1	23	99	3	0	#NULL!	#NULL!	1	0	4	0	0	0		0		#NULL!	1		0	0	#NULL!	#NULL!	#NULL!	#NULL!	#NULL!	#NULL!	#NULL!	#NULL!	#NULL!	1	#NULL!	7	0	1	#NULL!	0	0	#NULL!	0	1	#NULL!	#NULL!	#NULL!	#NULL!	1	#NULL!	#NULL!	0
289	0	26	#NULL!	3	1	#NULL!	#NULL!	1	0	12	0	#NULL!	0		0		#NULL!	1		0	0	#NULL!	#NULL!	#NULL!	#NULL!	#NULL!	#NULL!	#NULL!	#NULL!	#NULL!	1	#NULL!	4	0	1	#NULL!	0	0	#NULL!	0	1	#NULL!	#NULL!	0	#NULL!	#NULL!	#NULL!	#NULL!	1
290	1	0	31	3	0	1.71	4	1	0	1	0	0	0		0		#NULL!	2		1	0	2	#NULL!	#NULL!	#NULL!	#NULL!	#NULL!	#NULL!	#NULL!	0	1	#NULL!	15	0	1	#NULL!	#NULL!	0	2	0	0	3	#NULL!	2	3	#NULL!	#NULL!	#NULL!	1
291	0	10	0	3	1	#NULL!	2	2	0	1	0	1	0		0		#NULL!	1		1	0	2	4	#NULL!	#NULL!	#NULL!	#NULL!	#NULL!	#NULL!	#NULL!	1	#NULL!	2	#NULL!	1	#NULL!	#NULL!	0	#NULL!	#NULL!	0	#NULL!	#NULL!	0	#NULL!	#NULL!	#NULL!	#NULL!	1
292	0	3	#NULL!	3	1	2.9	2	1	0	2	0	0	0		0		#NULL!	1		1	0	2	#NULL!	#NULL!	#NULL!	#NULL!	#NULL!	#NULL!	#NULL!	#NULL!	1	#NULL!	4	0	1	#NULL!	0	0	3	0	0	1	#NULL!	0	1	1	#NULL!	#NULL!	1
293	0	26	99	3	1	#NULL!	#NULL!	1	2	4	0	0	0		0		#NULL!	1		0	0	#NULL!	#NULL!	#NULL!	#NULL!	#NULL!	#NULL!	#NULL!	#NULL!	#NULL!	1	#NULL!	7	0	1	#NULL!	#NULL!	0	#NULL!	0	0	1	3	0	1	#NULL!	#NULL!	#NULL!	1
294	1	8	99	3	1	#NULL!	#NULL!	1	0	4	0	0	0		0		#NULL!	1		0	0	#NULL!	#NULL!	#NULL!	#NULL!	#NULL!	#NULL!	#NULL!	#NULL!	#NULL!	1	#NULL!	6	0	1	#NULL!	#NULL!	0	#NULL!	0	0	#NULL!	#NULL!	0	#NULL!	#NULL!	#NULL!	#NULL!	1
295	0	19	99	3	1	#NULL!	6	1	0	4	0	0	0		0	malaria	#NULL!	1		0	0	6	4	#NULL!	#NULL!	#NULL!	#NULL!	#NULL!	#NULL!	1	1	#NULL!	5	0	1	#NULL!	#NULL!	0	#NULL!	0	0	3	#NULL!	0	3	#NULL!	#NULL!	#NULL!	1
296	1	0	99	3	1	2.86	1	1	0	3	3	1	0		0		#NULL!	1		0	0	1	4	#NULL!	#NULL!	#NULL!	#NULL!	#NULL!	#NULL!	#NULL!	1	#NULL!	3	1	4	3	1	0	3	0	0	#NULL!	#NULL!	0	#NULL!	#NULL!	#NULL!	#NULL!	1
297	0	1	99	3	1	4.2	1	1	0	4	0	0	0		0		#NULL!	1		0	0	1	2	#NULL!	#NULL!	#NULL!	#NULL!	#NULL!	#NULL!	0	1	1	2	0	1	#NULL!	0	0	4	0	1	2	#NULL!	0	2	1	#NULL!	#NULL!	0
298	0	1	99	3	1	2.5	1	1	0	3	3	0	0		0		#NULL!	1		0	0	1	4	#NULL!	#NULL!	#NULL!	#NULL!	#NULL!	#NULL!	0	1	#NULL!	5	0	1	#NULL!	#NULL!	0	2	1	0	2	#NULL!	0	2	#NULL!	#NULL!	#NULL!	1
299	1	0	39	3	#NULL!	2.95	1	1	0	3	1	0	0		0		25	1		0	0	1	4	#NULL!	#NULL!	#NULL!	#NULL!	#NULL!	0	0	1	1	2	0	1	#NULL!	0	0	3	1	0	1	#NULL!	0	2	1	#NULL!	#NULL!	1
300	0	0	39	3	0	4.494	#NULL!	#NULL!	2	6	0	#NULL!	0		0		36	1		0	0	#NULL!	4	0	0	2	0	0	#NULL!	#NULL!	1	1	7	0	1	#NULL!	#NULL!	0	4	0	0	#NULL!	#NULL!	0	#NULL!	#NULL!	#NULL!	#NULL!	1
301	1	0	38	3	0	2.95	1	#NULL!	0	3	1	0	0		0		26	1		0	0	2	4	#NULL!	#NULL!	2	0	0	0	0	1	1	2	0	1	#NULL!	#NULL!	0	3	1	0	1	1	0	1	#NULL!	#NULL!	#NULL!	1
302	1	0	39	3	0	3.591	#NULL!	1	0	3	1	0	0		0		29	1		0	0	#NULL!	2	#NULL!	#NULL!	2	0	0	0	0	1	1	1	0	1	#NULL!	#NULL!	0	3	0	1	2	#NULL!	0	1	#NULL!	#NULL!	#NULL!	0
303	0	1	30	3	1	1.29	4	2	0	1	0	0	0		0		38	1		1	0	5	2	#NULL!	#NULL!	2	0	0	0	0	1	1	24	0	1	#NULL!	#NULL!	0	1	0	0	2	#NULL!	0	2	#NULL!	#NULL!	#NULL!	1
304	0	3	#NULL!	3	1	3	1	1	2	3	3	0	0		0	seizures	26	1		1	0	1	0	#NULL!	#NULL!	3	0	0	0	0	1	0	8	0	1	#NULL!	#NULL!	0	3	1	0	2	#NULL!	0	2	#NULL!	#NULL!	#NULL!	1
305	1	14	39	3	0	4	#NULL!	1	0	4	0	0	0		0	staph scalded skin syndrome	#NULL!	1		0	0	#NULL!	2	#NULL!	#NULL!	2	0	0	0	0	1	1	19	0	1	#NULL!	0	0	3	1	0	1	3	0	2	1	#NULL!	#NULL!	0
306	1	2	30	3	1	1.64	#NULL!	#NULL!	0	1	2	1	0		0	sepsis	35	1		1	0	6	0	#NULL!	#NULL!	3	0	0	0	0	1	0	7	0	1	#NULL!	0	0	2	1	0	3	#NULL!	0	3	#NULL!	#NULL!	#NULL!	0
307	0	0	27	3	0	1.378	#NULL!	1	0	1	0	0	0		0	sepsis	27	1		1	0	#NULL!	2	#NULL!	#NULL!	2	0	0	0	1	1	1	47	0	1	#NULL!	#NULL!	0	1	0	0	2	#NULL!	0	2	0	#NULL!	#NULL!	1
308	1	3	39	3	0	3.3	2	1	0	2	0	0	0		0	sepsis	28	1		0	0	2	2	0	0	2	0	0	0	0	1	1	3	0	1	#NULL!	0	0	3	1	0	1	1	0	1	1	#NULL!	#NULL!	1
309	0	12	38	3	1	2.9	#NULL!	1	0	4	0	0	0		0	sepsis	28	1		0	0	1	2	#NULL!	#NULL!	2	0	0	0	0	1	1	5	0	1	#NULL!	0	0	3	0	1	#NULL!	#NULL!	0	#NULL!	#NULL!	#NULL!	#NULL!	1
310	1	0	36	3	0	2.15	#NULL!	1	2	1	0	0	0		0		32	1		0	0	1	2	0	0	2	#NULL!	#NULL!	0	0	1	#NULL!	7	0	1	#NULL!	0	0	2	#NULL!	1	#NULL!	#NULL!	0	#NULL!	#NULL!	#NULL!	#NULL!	1
311	0	1	#NULL!	5	1	1.9	1	1	0	7	0	0	1	omphalocoele	0	sepsis	#NULL!	2		0	0	1	4	0	0	2	0	0	0	0	1	1	15	1	4	16	1	1	2	1	0	4	#NULL!	0	4	1	1	0	1
312	1	1	38	3	0	3.87	2	1	0	3	3	0	0		0		32	1		0	0	2	3	#NULL!	#NULL!	2	0	0	0	0	1	1	1	1	4	1	1	0	3	1	0	4	#NULL!	0	2	#NULL!	#NULL!	#NULL!	1
313	1	10	38	3	1	2.4	#NULL!	1	0	8	0	0	0		0	nnj	32	1		#NULL!	1	2	2	#NULL!	#NULL!	2	0	0	0	0	1	1	1	1	4	10	1	0	2	1	1	2	#NULL!	0	2	1	#NULL!	#NULL!	1
314	1	1	30	3	0	1.49	#NULL!	2	2	1	0	0	0		0		32	1		0	0	6	0	#NULL!	#NULL!	#NULL!	0	0	0	0	1	0	22	0	2	#NULL!	0	0	1	#NULL!	0	2	#NULL!	0	2	#NULL!	#NULL!	#NULL!	1
315	1	10	32	3	0	1.8	#NULL!	2	0	2	0	0	0		0		36	1		0	1	2	2	#NULL!	#NULL!	2	0	0	0	1	1	1	6	0	1	#NULL!	0	0	2	0	1	#NULL!	#NULL!	0	#NULL!	#NULL!	#NULL!	#NULL!	1
316	1	5	39	3	1	#NULL!	#NULL!	#NULL!	0	2	0	0	0		0		32	1		1	0	3	2	#NULL!	#NULL!	2	0	0	0	0	1	#NULL!	3	0	1	#NULL!	#NULL!	0	#NULL!	0	1	#NULL!	#NULL!	0	#NULL!	#NULL!	#NULL!	#NULL!	1
317	1	0	30	3	0	1.224	#NULL!	2	2	1	0	0	0		0		32	1		1	0	6	0	#NULL!	#NULL!	3	0	0	0	0	1	0	23	0	1	#NULL!	#NULL!	0	1	0	1	4	#NULL!	0	6	1	#NULL!	#NULL!	1
318	1	2	38	3	0	3.6	#NULL!	1	2	2	0	0	0		0		26	1		0	0	1	2	0	0	2	0	0	0	0	1	1	4	0	1	#NULL!	0	0	3	0	0	1	#NULL!	0	1	1	#NULL!	#NULL!	0
319	0	0	38	3	0	4.6	#NULL!	1	2	6	0	0	0		0	meconium aspiration syndrome	25	1		0	0	#NULL!	2	0	0	2	0	0	0	0	1	1	4	0	1	#NULL!	#NULL!	0	4	0	0	1	#NULL!	0	1	1	#NULL!	#NULL!	1
320	1	0	#NULL!	3	0	2.7	#NULL!	1	0	11	0	0	0		0		26	1		0	0	1	2	#NULL!	#NULL!	2	0	0	0	0	1	1	3	0	1	#NULL!	#NULL!	0	3	0	0	1	#NULL!	0	1	1	#NULL!	#NULL!	1
321	1	4	38	3	1	3.21	3	1	0	3	3	0	0		0	cerebral palsy	28	2		0	0	3	#NULL!	0	0	#NULL!	0	0	0	0	1	0	7	0	1	#NULL!	0	0	3	0	0	1	1	0	1	1	#NULL!	#NULL!	1
322	1	5	#NULL!	3	0	3.06	2	1	0	22	0	0	0	g6pd def	0		31	1		0	0	2	2	0	0	2	0	0	0	0	1	1	5	0	1	#NULL!	0	0	3	0	0	1	1	0	1	1	1	0	1
323	0	2	39	3	1	3.024	#NULL!	1	2	3	3	0	0		0		30	1		0	0	2	2	#NULL!	#NULL!	#NULL!	0	0	0	0	1	1	1	1	4	2	1	0	3	0	0	#NULL!	5	0	#NULL!	1	1	0	1
324	1	13	38	3	0	3.6	#NULL!	1	0	4	0	0	0		0		30	1		0	0	2	2	0	0	2	0	0	0	0	1	1	3	0	2	#NULL!	#NULL!	0	3	0	0	1	3	0	2	1	1	0	1
325	0	1	#NULL!	3	1	3.36	2	1	0	3	3	0	0		0		29	2		0	0	3	2	0	0	2	0	0	0	0	1	1	8	0	1	#NULL!	#NULL!	0	3	0	0	#NULL!	3	0	#NULL!	1	1	0	1
326	1	3	38	3	0	3.52	3	1	2	2	0	0	0		0		32	1	paint selling	#NULL!	0	4	2	0	0	#NULL!	0	1	0	0	1	2	5	0	1	#NULL!	#NULL!	0	3	1	0	4	5	0	5	1	1	0	1
327	0	0	#NULL!	3	1	2.8	1	1	2	3	2	0	0		0	anaemia	#NULL!	1		0	#NULL!	5	0	0	0	#NULL!	0	0	0	0	1	0	2	0	2	#NULL!	#NULL!	0	3	#NULL!	0	1	3	0	1	0	2	1	1
328	0	2	35	3	1	1.6	1	1	2	2	1	0	0		0		#NULL!	1		1	0	1	4	0	0	#NULL!	0	0	0	1	1	1	14	0	1	#NULL!	0	0	2	0	1	#NULL!	#NULL!	0	#NULL!	1	1	0	1
329	0	2	42	3	1	2.642	1	1	0	9	2	0	0		0		26	2		0	0	1	4	0	0	#NULL!	0	0	0	0	1	1	3	0	1	#NULL!	#NULL!	0	3	1	0	#NULL!	4	0	6	0	2	1	1
330	1	1	#NULL!	3	0	2.718	2	2	2	12	0	0	0		0		#NULL!	1		0	0	2	4	0	0	#NULL!	0	0	0	0	1	1	2	0	1	#NULL!	0	0	3	1	0	#NULL!	3	0	#NULL!	1	1	0	1
331	0	5	#NULL!	3	0	3.3	1	1	2	9	0	0	0		0		#NULL!	1	trading	0	0	#NULL!	4	#NULL!	#NULL!	#NULL!	0	#NULL!	0	0	#NULL!	#NULL!	5	0	1	#NULL!	0	0	3	0	0	2	3	0	2	1	1	0	1
332	1	18	#NULL!	3	1	#NULL!	1	1	0	15	0	1	0		0		20	#NULL!	unemployed	0	0	1	0	0	0	3	1	0	1	0	1	0	5	0	1	#NULL!	#NULL!	0	#NULL!	0	1	#NULL!	3	0	1	1	1	0	1
333	0	1	#NULL!	3	1	2.5	1	1	0	4	2	0	0		0		22	2	unemployed	1	0	1	2	0	0	#NULL!	0	0	0	0	1	1	9	0	1	#NULL!	#NULL!	0	2	1	0	#NULL!	4	0	1	1	1	0	1
334	1	1	38	3	0	3.31	1	1	2	3	2	0	0		0		#NULL!	1		0	0	2	4	0	0	2	0	0	0	0	1	1	2	0	1	#NULL!	0	0	3	#NULL!	0	1	#NULL!	0	1	1	1	0	0
335	0	0	#NULL!	3	0	2.268	2	2	2	3	2	0	0		0		#NULL!	1		0	0	1	4	0	0	2	0	0	0	0	1	1	3	0	1	#NULL!	#NULL!	0	2	0	0	2	4	0	2	1	1	0	0
336	0	0	36	3	0	1.92	1	#NULL!	2	5	0	0	0		0		24	1		0	0	1	4	0	0	2	0	0	0	1	1	2	5	0	1	#NULL!	0	0	2	0	1	#NULL!	4	1	2	1	1	0	0
337	1	0	28	3	0	1.164	1	1	0	7	0	#NULL!	1	hydrocephalus	0	nnj	#NULL!	1	trading	0	#NULL!	3	4	0	0	#NULL!	0	0	0	1	1	0	17	0	3	#NULL!	#NULL!	1	1	#NULL!	0	4	#NULL!	0	6	1	#NULL!	#NULL!	1
338	0	0	33	3	0	2.066	1	1	2	1	0	0	0		0		#NULL!	1		0	0	2	4	0	0	2	0	0	0	0	1	1	5	0	1	#NULL!	#NULL!	0	2	1	0	#NULL!	4	0	6	0	#NULL!	#NULL!	0
339	1	3	33	3	0	2.364	#NULL!	1	2	22	0	0	0	g6pd def	0		#NULL!	1		0	0	#NULL!	#NULL!	#NULL!	#NULL!	#NULL!	0	0	0	0	1	#NULL!	2	0	1	#NULL!	#NULL!	0	2	1	0	2	1	0	1	1	1	0	0
340	1	19	#NULL!	3	0	#NULL!	1	1	0	4	0	0	0		0		25	1	teaching	0	0	#NULL!	2	0	0	2	0	0	0	0	1	1	8	0	1	#NULL!	#NULL!	0	#NULL!	1	1	#NULL!	5	1	2	1	1	0	1
341	1	3	39	3	0	3.274	2	1	2	22	0	0	0	g6pd def	0		#NULL!	#NULL!		0	0	3	3	#NULL!	#NULL!	2	1	0	0	0	1	1	7	0	1	#NULL!	#NULL!	0	3	1	0	1	1	0	1	1	1	0	0
342	1	0	32	3	0	1.974	2	1	2	22	0	0	0	g6pd def	0		28	1		0	0	3	2	0	0	2	0	1	0	1	1	1	4	0	1	#NULL!	#NULL!	0	2	0	0	1	1	0	1	1	1	0	1
343	1	0	33	3	0	1.74	1	1	2	1	0	#NULL!	0		0		#NULL!	2		1	0	1	4	0	0	2	0	0	0	0	1	1	2	0	1	#NULL!	#NULL!	0	2	0	0	#NULL!	4	0	3	1	1	0	1
344	1	3	#NULL!	3	0	#NULL!	1	1	0	2	0	#NULL!	0		0		#NULL!	2		0	0	1	4	0	0	2	0	0	0	0	1	1	2	0	2	#NULL!	0	0	#NULL!	1	0	#NULL!	4	0	6	0	2	1	1
345	0	0	36	3	0	2.06	1	1	2	1	2	0	0		0		18	2		0	0	1	#NULL!	0	0	#NULL!	0	#NULL!	0	0	0	1	2	0	1	#NULL!	0	0	2	0	0	#NULL!	3	0	1	1	1	0	1
346	0	0	35	3	1	1.658	#NULL!	1	2	7	0	0	1	CTEV	0		24	1		0	0	2	2	0	0	2	0	0	0	0	1	1	10	0	1	#NULL!	#NULL!	0	2	#NULL!	0	3	#NULL!	0	3	1	1	0	0
347	1	0	36	3	0	1.6	#NULL!	#NULL!	2	3	3	0	0		0		36	1		0	0	#NULL!	#NULL!	0	#NULL!	#NULL!	0	0	0	0	1	0	18	0	1	#NULL!	#NULL!	0	2	0	0	#NULL!	1	0	#NULL!	1	1	0	1
348	1	0	38	3	0	2.728	#NULL!	1	2	3	1	0	0		0		30	1		0	0	3	2	#NULL!	#NULL!	2	0	0	0	0	1	1	1	0	1	#NULL!	#NULL!	0	3	#NULL!	0	#NULL!	3	0	1	1	1	0	1
349	1	0	39	3	0	3.5	#NULL!	1	0	3	3	0	0		0		25	1		1	0	#NULL!	4	#NULL!	#NULL!	2	0	0	0	0	1	1	7	0	1	#NULL!	0	0	3	0	0	3	3	0	3	#NULL!	#NULL!	#NULL!	1
350	0	3	#NULL!	3	0	3.4	#NULL!	1	0	22	0	0	0	g6pd def	0		24	1		0	0	#NULL!	2	0	0	2	0	0	0	0	1	1	4	0	1	#NULL!	0	0	3	#NULL!	0	1	4	0	1	1	0	0	1
351	1	3	#NULL!	3	0	3.164	#NULL!	1	0	22	0	0	0	g6pd def	0		19	1		0	0	1	2	0	0	2	0	0	0	0	0	1	4	0	1	#NULL!	#NULL!	0	3	0	0	1	2	1	1	1	#NULL!	#NULL!	1
352	1	16	38	3	1	#NULL!	#NULL!	1	0	13	0	0	0		0		22	2		0	0	1	2	0	0	2	0	0	0	0	1	1	3	0	1	#NULL!	0	0	#NULL!	#NULL!	0	2	4	0	2	1	1	0	1
354	1	0	36	4	0	2.42	#NULL!	#NULL!	2	3	1	0	0		0		27	1		1	#NULL!	#NULL!	2	0	0	2	0	0	0	0	1	1	4	0	1	#NULL!	0	0	2	0	0	#NULL!	3	0	2	1	#NULL!	#NULL!	0
355	1	0	39	4	1	3.55	#NULL!	1	0	3	3	0	0		0		35	2		0	0	2	2	0	0	2	0	0	0	0	1	1	7	0	1	#NULL!	#NULL!	0	3	0	1	#NULL!	3	0	2	1	1	0	0
356	1	0	43	4	0	3.6	#NULL!	1	2	3	2	0	0		0		37	1		0	0	#NULL!	2	0	0	2	0	0	0	1	1	1	4	0	1	#NULL!	#NULL!	0	3	#NULL!	0	2	3	0	3	1	1	0	1
357	0	3	38	4	0	2.96	#NULL!	1	0	2	0	0	0		0		25	1		0	0	1	2	0	0	2	0	0	0	0	1	0	5	0	1	#NULL!	0	0	3	0	0	3	4	0	4	1	#NULL!	#NULL!	1
358	1	0	#NULL!	4	1	3.3	#NULL!	1	0	4	0	0	0		0		27	1		0	0	2	0	#NULL!	#NULL!	#NULL!	0	0	0	0	1	1	5	0	1	#NULL!	0	0	3	#NULL!	0	1	#NULL!	#NULL!	5	0	#NULL!	#NULL!	0
359	0	0	34	4	0	1.18	1	1	2	1	0	0	0		0		36	1		1	0	1	0	0	0	3	0	0	0	0	1	0	21	0	2	#NULL!	0	0	1	1	0	1	#NULL!	0	1	1	#NULL!	#NULL!	1
360	0	0	41	4	0	4.052	#NULL!	1	0	6	0	0	0		0		30	1		0	0	1	3	#NULL!	#NULL!	#NULL!	0	0	0	0	1	0	3	0	1	#NULL!	#NULL!	0	4	0	0	1	3	0	1	1	#NULL!	#NULL!	1
361	1	1	#NULL!	4	1	2.752	#NULL!	1	0	3	2	0	0		0		22	1		1	0	1	4	0	0	#NULL!	0	0	0	0	1	0	6	0	1	#NULL!	#NULL!	0	3	#NULL!	0	2	#NULL!	0	2	1	#NULL!	#NULL!	1
362	1	6	#NULL!	4	1	#NULL!	#NULL!	1	0	2	0	0	0		0	sepsis	37	1		0	0	4	#NULL!	0	#NULL!	#NULL!	0	0	0	0	1	0	6	0	1	#NULL!	#NULL!	0	#NULL!	#NULL!	0	1	#NULL!	0	#NULL!	1	#NULL!	#NULL!	1
363	1	5	#NULL!	4	1	3	#NULL!	1	2	2	0	0	0		0		27	2		1	0	1	2	0	0	2	0	0	0	0	1	1	4	0	1	#NULL!	#NULL!	0	3	#NULL!	1	1	2	0	1	0	2	1	1
364	1	3	38	5	1	3	1	1	0	7	3	0	1	hydrocephalus	0	sepsis	30	1		0	0	1	2	#NULL!	#NULL!	2	0	0	0	0	1	1	10	0	1	#NULL!	#NULL!	1	3	1	0	#NULL!	#NULL!	0	#NULL!	#NULL!	#NULL!	#NULL!	1
365	0	3	40	4	0	3.042	#NULL!	1	0	2	0	0	0		0		23	2		0	0	1	2	0	0	2	0	0	0	0	1	1	5	0	1	#NULL!	#NULL!	0	3	#NULL!	0	1	1	0	1	1	#NULL!	#NULL!	1
366	1	0	#NULL!	4	0	3.38	#NULL!	1	2	3	2	0	0		0		23	2		0	0	1	2	#NULL!	#NULL!	2	0	0	0	0	1	1	3	0	1	#NULL!	#NULL!	0	3	0	0	1	#NULL!	0	2	1	1	0	1
367	0	3	#NULL!	4	0	2.9	1	1	0	2	0	0	0		0		28	1		0	0	1	2	0	0	2	0	0	0	0	1	1	3	0	1	#NULL!	#NULL!	0	3	#NULL!	0	2	#NULL!	0	1	1	1	0	1
368	1	0	42	4	0	3.2	#NULL!	1	2	3	2	0	0		0		36	1		0	0	1	2	0	0	2	0	0	0	0	1	1	4	0	1	#NULL!	#NULL!	0	3	1	0	1	1	0	1	1	1	0	1
369	1	0	#NULL!	4	1	3.35	#NULL!	1	0	3	2	1	0		0		38	1		1	0	3	4	#NULL!	#NULL!	#NULL!	0	0	0	0	1	0	4	0	1	#NULL!	#NULL!	0	3	1	0	1	#NULL!	#NULL!	3	1	#NULL!	#NULL!	0
370	0	3	99	3	#NULL!	3.5	1	#NULL!	2	4	0	#NULL!	0		0	nnj	#NULL!	#NULL!	lab technician	0	0	#NULL!	2	0	0	2	0	0	0	0	1	1	2	0	#NULL!	#NULL!	0	0	3	1	0	1	#NULL!	0	2	1	1	0	1
371	0	2	32	3	1	1.6	4	2	0	7	0	0	1	PDA	0		35	1		0	#NULL!	4	4	#NULL!	#NULL!	#NULL!	#NULL!	#NULL!	#NULL!	#NULL!	1	#NULL!	22	0	1	#NULL!	#NULL!	1	2	1	0	#NULL!	#NULL!	0	#NULL!	1	1	0	1
372	1	5	#NULL!	3	0	#NULL!	#NULL!	1	0	2	0	0	0		0		#NULL!	1		0	0	#NULL!	#NULL!	#NULL!	#NULL!	#NULL!	#NULL!	#NULL!	#NULL!	#NULL!	1	#NULL!	3	0	1	#NULL!	#NULL!	0	#NULL!	1	0	#NULL!	#NULL!	0	#NULL!	#NULL!	#NULL!	#NULL!	1
373	0	8	99	3	0	3	#NULL!	1	0	4	0	0	0		0	nnj	#NULL!	1	nurse	0	0	#NULL!	2	0	0	2	0	0	0	0	1	1	4	0	1	#NULL!	0	0	3	#NULL!	1	1	1	0	#NULL!	1	1	0	1
374	1	2	37	3	0	3.142	5	1	0	5	0	0	0		0		35	2		0	0	6	3	0	0	#NULL!	0	0	0	1	#NULL!	1	4	0	1	#NULL!	#NULL!	0	3	0	0	2	#NULL!	0	3	1	1	0	1
375	0	4	#NULL!	3	1	2.3	1	1	0	5	0	0	0		0	nnj	29	2		0	0	1	1	0	0	1	0	0	0	0	1	1	2	0	1	#NULL!	#NULL!	0	2	1	0	2	3	0	3	1	1	0	1
376	0	0	99	3	0	3.6	1	1	0	16	0	0	0		0		28	1		0	0	2	4	0	0	2	0	0	0	0	1	1	2	0	1	#NULL!	#NULL!	0	3	1	0	1	#NULL!	0	1	1	1	0	1
377	1	18	99	4	1	#NULL!	2	1	0	22	0	0	0	g6pd def	0		#NULL!	1		0	0	3	#NULL!	#NULL!	#NULL!	#NULL!	#NULL!	#NULL!	#NULL!	0	1	1	7	0	1	#NULL!	#NULL!	0	#NULL!	#NULL!	0	1	#NULL!	0	1	1	1	0	1
378	0	1	34	4	1	1.956	2	1	2	22	1	0	0	g6pd def	0	nnj	#NULL!	1		0	0	2	4	0	0	2	0	0	0	0	1	1	5	0	1	#NULL!	0	0	2	0	0	3	#NULL!	0	3	#NULL!	#NULL!	#NULL!	1
379	1	5	37	4	0	3.4	2	1	0	22	0	0	0	g6pd def	0	sepsis	36	1		0	0	2	3	0	0	2	0	0	0	0	1	1	3	0	1	#NULL!	0	0	3	1	0	4	6	0	5	1	1	0	0
380	0	0	#NULL!	4	0	4.25	1	1	2	6	0	0	0		0		#NULL!	1		0	0	1	4	0	0	2	0	0	0	0	1	1	3	0	1	#NULL!	0	0	4	#NULL!	0	1	#NULL!	0	1	1	1	0	0
381	1	1	#NULL!	4	0	3.548	#NULL!	1	0	5	0	0	0		0		#NULL!	1		0	0	#NULL!	4	0	0	#NULL!	0	0	0	0	1	1	2	0	1	#NULL!	0	0	3	1	0	1	2	0	1	#NULL!	#NULL!	#NULL!	1
382	0	0	39	4	1	3.1	1	1	0	3	3	0	0		0		28	2		1	0	1	4	0	0	#NULL!	0	0	0	0	1	1	3	0	2	#NULL!	#NULL!	0	3	1	0	#NULL!	1	0	2	1	1	0	1
383	1	4	99	4	1	2.296	#NULL!	#NULL!	0	2	#NULL!	#NULL!	0		0	sepsis	27	#NULL!	student	0	0	#NULL!	2	0	0	2	0	0	0	0	1	1	3	0	1	#NULL!	#NULL!	0	2	1	0	#NULL!	5	0	#NULL!	#NULL!	#NULL!	#NULL!	1
384	1	0	32	4	0	1.642	8	1	2	1	0	0	0		0		39	1		1	0	8	4	0	0	#NULL!	0	0	0	0	#NULL!	1	7	0	1	#NULL!	#NULL!	0	2	0	0	#NULL!	3	0	3	1	1	0	1
385	1	19	99	4	1	#NULL!	1	1	0	14	0	0	0		0	sepsis	20	1		1	0	1	4	0	0	#NULL!	0	0	#NULL!	#NULL!	1	1	7	0	1	#NULL!	0	0	#NULL!	0	0	#NULL!	1	0	#NULL!	1	1	0	1
386	0	6	38	4	0	#NULL!	#NULL!	1	0	2	0	0	0		0		#NULL!	1		0	0	#NULL!	4	0	0	#NULL!	0	0	0	0	1	1	2	0	1	#NULL!	0	0	#NULL!	#NULL!	0	#NULL!	1	0	#NULL!	1	1	0	1
387	0	21	32	4	1	#NULL!	#NULL!	2	0	7	0	0	1	PDA	0	HDN	#NULL!	2		0	0	#NULL!	#NULL!	#NULL!	#NULL!	#NULL!	#NULL!	#NULL!	#NULL!	#NULL!	#NULL!	#NULL!	4	0	2	#NULL!	#NULL!	1	#NULL!	1	0	4	6	0	5	1	1	0	1
388	1	0	31	4	0	1.25	2	2	0	22	0	0	0	g6pd def	0	nnj	21	1		0	0	1	4	0	0	#NULL!	0	1	0	0	1	1	30	0	1	#NULL!	#NULL!	0	1	1	0	1	3	0	1	1	1	0	1
389	1	8	99	4	0	2.7	#NULL!	1	0	2	0	0	0		0		#NULL!	1		0	0	#NULL!	4	0	0	2	0	0	0	0	1	0	6	0	1	#NULL!	0	0	3	#NULL!	0	#NULL!	2	0	1	1	1	0	1
390	1	0	36	4	1	1.7	4	2	0	1	0	0	0		0		40	2	trading	0	0	4	2	0	0	2	0	0	0	0	1	1	2	0	1	#NULL!	#NULL!	0	2	0	1	#NULL!	1	0	1	1	1	0	1
391	1	0	37	4	0	2.42	3	2	2	3	1	0	0		0		36	2		1	0	4	2	0	0	2	0	0	0	0	1	1	2	0	1	#NULL!	#NULL!	0	2	1	0	#NULL!	3	#NULL!	#NULL!	1	1	0	1
392	0	0	37	4	0	2.272	4	2	2	3	1	0	0		0		36	2		1	0	4	2	0	0	2	0	0	0	0	1	1	2	0	1	#NULL!	#NULL!	0	2	0	0	#NULL!	4	0	2	1	1	0	1
393	0	0	36	4	0	1.582	1	2	2	1	0	0	0		0		20	1		1	0	1	2	0	0	2	0	0	0	0	#NULL!	1	2	0	1	#NULL!	0	0	2	0	0	#NULL!	5	0	#NULL!	1	1	0	1
394	0	0	36	4	0	1.56	2	2	2	1	1	0	0		0		20	1		1	0	1	2	0	0	2	0	0	0	0	#NULL!	1	2	0	1	#NULL!	0	0	2	0	0	#NULL!	1	0	1	1	1	0	1
395	1	0	#NULL!	4	0	3.32	1	1	2	0	0	0	0		0		#NULL!	#NULL!		0	0	2	2	0	#NULL!	2	0	0	0	0	1	1	1	0	1	#NULL!	#NULL!	0	3	#NULL!	0	#NULL!	3	0	2	0	#NULL!	#NULL!	1
396	0	0	28	4	1	1.3	3	2	0	7	0	0	1	ASD	0		35	1		0	0	2	2	0	0	2	0	0	0	0	1	1	33	0	1	#NULL!	#NULL!	1	1	0	0	2	#NULL!	0	2	1	#NULL!	#NULL!	0
397	1	0	32	4	1	1.9	3	2	0	1	1	0	0		0		31	1		1	0	3	4	0	0	#NULL!	0	0	0	0	1	1	14	0	1	#NULL!	#NULL!	0	2	1	0	1	5	0	1	0	2	1	0
398	0	3	38	4	0	3.7	2	1	2	2	0	0	0		0		#NULL!	1		1	0	2	4	0	0	2	#NULL!	#NULL!	#NULL!	1	1	#NULL!	4	0	1	#NULL!	#NULL!	0	3	0	0	#NULL!	3	0	1	1	#NULL!	#NULL!	1
399	1	2	99	3	1	3.3	1	1	0	2	0	0	0		0		22	1		1	0	1	4	0	0	#NULL!	0	0	#NULL!	0	1	1	10	0	1	#NULL!	#NULL!	0	3	#NULL!	0	#NULL!	1	0	1	1	#NULL!	#NULL!	1
400	0	1	42	4	0	3.5	5	1	0	5	0	0	0		0		37	1		0	#NULL!	5	0	0	0	#NULL!	0	0	0	0	1	0	1	0	1	#NULL!	#NULL!	0	3	#NULL!	0	#NULL!	5	0	4	#NULL!	#NULL!	#NULL!	1
401	1	0	38	4	1	3.05	#NULL!	1	2	3	3	0	0		0		25	1		1	0	1	2	0	0	2	0	0	0	0	1	1	10	0	1	#NULL!	0	0	3	#NULL!	0	#NULL!	3	0	1	1	1	0	1
402	1	6	#NULL!	4	0	#NULL!	2	1	0	22	0	0	0	g6pd def	0		26	1		0	0	2	2	0	0	2	0	0	0	0	1	1	5	0	1	#NULL!	0	0	#NULL!	#NULL!	0	4	#NULL!	2	5	0	2	1	0
403	1	#NULL!	39	4	1	4.5	#NULL!	1	0	22	3	0	0	g6pd def	0	sepsis	25	1		0	0	2	2	0	0	2	0	0	0	0	1	1	9	0	1	#NULL!	#NULL!	0	4	0	0	2	4	0	2	#NULL!	#NULL!	#NULL!	1
404	1	0	40	4	0	2.96	#NULL!	1	0	3	2	0	0		0		29	1		1	0	2	2	0	0	2	0	0	0	0	1	1	12	0	1	#NULL!	#NULL!	0	3	0	0	1	3	0	1	1	1	0	1
405	1	0	42	4	0	3.08	#NULL!	1	2	16	0	0	0		0		32	1		1	0	3	2	0	0	2	0	0	0	0	1	1	3	0	1	#NULL!	0	0	3	0	0	#NULL!	1	0	1	1	1	0	1
406	1	0	#NULL!	4	1	3	#NULL!	1	0	3	2	0	0		0		26	1		1	0	2	0	0	0	3	0	0	#NULL!	#NULL!	1	0	7	0	2	#NULL!	#NULL!	0	3	#NULL!	0	#NULL!	1	0	1	1	1	0	1
407	1	0	40	4	1	3	#NULL!	1	0	3	1	0	0		0		26	1		1	0	2	0	#NULL!	#NULL!	3	0	0	0	0	1	0	7	0	1	#NULL!	#NULL!	0	3	#NULL!	0	1	3	0	1	1	1	0	1
408	0	0	99	3	0	2.944	1	1	0	3	2	0	0		0		32	2		0	0	1	#NULL!	#NULL!	#NULL!	#NULL!	#NULL!	#NULL!	#NULL!	0	1	#NULL!	6	0	1	#NULL!	#NULL!	0	3	0	0	#NULL!	5	0	1	1	1	0	1
409	1	0	40	3	0	4.236	1	1	2	6	0	0	0		0		#NULL!	1		1	0	1	2	#NULL!	#NULL!	2	0	0	0	0	1	1	2	0	1	#NULL!	0	0	4	#NULL!	0	#NULL!	5	0	3	1	#NULL!	#NULL!	1
410	1	0	40	3	0	3.55	5	1	2	3	2	0	0		0		#NULL!	1		0	0	5	3	#NULL!	#NULL!	3	0	0	0	0	1	0	2	0	1	#NULL!	#NULL!	0	3	0	0	1	#NULL!	0	#NULL!	1	1	0	#NULL!
411	0	0	36	4	1	2.2	#NULL!	1	2	3	1	0	0		0		35	1		0	0	5	2	0	0	2	0	0	0	0	1	1	3	0	1	#NULL!	#NULL!	0	2	1	0	4	4	#NULL!	4	1	#NULL!	#NULL!	1
412	1	2	99	4	0	2.9	#NULL!	1	0	2	0	0	0		0	sepsis	#NULL!	1		0	0	#NULL!	#NULL!	#NULL!	#NULL!	#NULL!	#NULL!	#NULL!	#NULL!	#NULL!	1	#NULL!	4	0	1	#NULL!	0	0	3	#NULL!	0	#NULL!	#NULL!	0	#NULL!	#NULL!	#NULL!	#NULL!	1
413	1	2	99	4	0	2.69	1	1	0	2	0	0	0		0	sepsis	23	1		1	0	1	#NULL!	#NULL!	#NULL!	#NULL!	#NULL!	#NULL!	#NULL!	#NULL!	1	#NULL!	4	0	2	#NULL!	#NULL!	0	3	0	1	#NULL!	#NULL!	0	#NULL!	1	1	0	1
414	1	0	99	4	1	3	3	1	0	0	0	1	0		0		#NULL!	1		1	2	3	4	#NULL!	#NULL!	#NULL!	#NULL!	#NULL!	#NULL!	#NULL!	1	1	3	0	1	#NULL!	#NULL!	0	3	0	0	4	4	0	6	1	#NULL!	#NULL!	1
415	0	0	34	4	0	2.05	4	1	2	1	0	0	0		0		#NULL!	1		0	0	4	#NULL!	#NULL!	#NULL!	#NULL!	#NULL!	#NULL!	#NULL!	#NULL!	1	#NULL!	2	0	1	#NULL!	#NULL!	0	2	#NULL!	0	1	3	0	1	1	0	0	1
416	0	0	29	4	1	1.5	1	1	0	1	0	0	0		0	sepsis	31	2		1	0	1	4	0	0	#NULL!	#NULL!	#NULL!	#NULL!	#NULL!	1	1	17	0	1	#NULL!	#NULL!	0	1	0	0	1	3	0	2	1	1	0	1
417	1	0	34	4	0	2.25	3	1	2	1	0	0	0		0		40	1		0	0	3	2	#NULL!	#NULL!	#NULL!	#NULL!	#NULL!	#NULL!	0	1	#NULL!	3	0	1	#NULL!	0	0	2	0	1	2	#NULL!	0	3	#NULL!	#NULL!	#NULL!	1
418	1	0	30	4	0	1.4	3	1	0	1	0	#NULL!	0		0	sepsis	24	1		0	0	2	4	#NULL!	#NULL!	#NULL!	#NULL!	#NULL!	#NULL!	0	1	#NULL!	22	0	1	#NULL!	0	0	1	1	0	2	#NULL!	0	2	1	1	0	1
419	0	3	99	4	1	3.7	5	1	0	7	0	1	1	genu recurvatum	0		#NULL!	1		0	0	5	#NULL!	#NULL!	#NULL!	#NULL!	#NULL!	#NULL!	#NULL!	#NULL!	1	#NULL!	3	0	1	#NULL!	#NULL!	0	3	#NULL!	0	1	2	0	1	1	1	0	1
420	1	7	99	4	1	#NULL!	1	1	0	22	0	1	0	g6pd def	0	sepsis	25	1		0	0	1	1	#NULL!	#NULL!	#NULL!	#NULL!	#NULL!	#NULL!	#NULL!	1	1	4	0	1	#NULL!	0	0	#NULL!	#NULL!	0	1	2	2	1	0	#NULL!	#NULL!	0
421	1	3	99	4	1	3	#NULL!	1	0	2	0	1	0		0		#NULL!	1		0	0	#NULL!	4	#NULL!	#NULL!	#NULL!	#NULL!	#NULL!	#NULL!	#NULL!	1	#NULL!	3	0	1	#NULL!	#NULL!	0	3	0	0	2	5	0	2	1	1	0	1
422	0	16	99	4	1	2.9	2	1	0	7	0	1	1	ARM	0		#NULL!	1		0	0	2	#NULL!	#NULL!	#NULL!	#NULL!	#NULL!	#NULL!	#NULL!	#NULL!	1	#NULL!	12	0	1	#NULL!	0	1	3	1	0	3	#NULL!	0	2	1	1	0	1
423	1	0	99	4	1	3.5	1	1	2	3	3	1	0		0		#NULL!	1		0	0	1	#NULL!	#NULL!	#NULL!	#NULL!	#NULL!	#NULL!	#NULL!	1	1	#NULL!	10	0	1	#NULL!	#NULL!	0	3	#NULL!	0	1	#NULL!	0	1	1	1	0	1
424	0	5	99	4	0	#NULL!	1	2	2	22	0	0	0	g6pd def	0		#NULL!	2		1	0	2	4	#NULL!	#NULL!	#NULL!	#NULL!	#NULL!	#NULL!	0	1	1	5	0	1	#NULL!	#NULL!	0	#NULL!	1	1	3	5	0	3	1	1	0	1
425	0	5	99	4	0	#NULL!	2	2	2	22	0	0	0	g6pd def	0		#NULL!	2		1	0	2	4	#NULL!	#NULL!	#NULL!	#NULL!	#NULL!	#NULL!	0	1	1	5	0	1	#NULL!	#NULL!	0	#NULL!	#NULL!	0	2	2	0	1	1	#NULL!	#NULL!	1
426	0	4	99	4	1	3	3	1	2	4	0	0	0		0		#NULL!	1		0	0	3	3	#NULL!	#NULL!	#NULL!	#NULL!	#NULL!	#NULL!	#NULL!	1	1	4	0	1	#NULL!	#NULL!	0	3	#NULL!	0	#NULL!	#NULL!	0	#NULL!	1	#NULL!	#NULL!	1
427	0	4	#NULL!	4	1	#NULL!	2	1	0	22	0	0	0	g6pd def	0	sepsis	#NULL!	2		1	0	2	2	#NULL!	#NULL!	#NULL!	#NULL!	#NULL!	#NULL!	0	1	1	5	0	1	#NULL!	#NULL!	0	#NULL!	#NULL!	0	1	3	0	1	1	1	0	1
428	0	0	35	4	0	2.458	#NULL!	1	2	1	0	0	0		0		#NULL!	1		0	0	2	0	0	0	3	0	0	0	0	1	0	2	0	1	#NULL!	#NULL!	0	2	0	0	1	3	0	1	1	#NULL!	#NULL!	0
429	0	0	28	4	#NULL!	0.9	1	1	0	1	0	0	0		0		30	1		0	0	1	0	0	0	3	0	0	0	0	1	0	22	0	1	#NULL!	#NULL!	0	0	0	0	#NULL!	3	0	#NULL!	1	1	0	1
430	1	0	34	4	0	3.2	#NULL!	1	0	1	0	0	0		0		32	1		0	0	2	2	0	0	2	0	0	0	0	1	1	4	0	1	#NULL!	#NULL!	0	3	1	0	4	5	0	6	1	#NULL!	#NULL!	1
431	1	0	#NULL!	4	1	3.2	#NULL!	1	0	3	3	0	0		0		29	1		0	0	1	2	0	0	2	0	0	0	0	1	1	6	0	1	#NULL!	#NULL!	0	3	0	1	1	2	0	1	1	#NULL!	#NULL!	1
432	1	0	39	4	1	3	#NULL!	1	0	3	3	0	0		0		40	2		0	0	1	2	0	0	2	0	0	0	0	1	1	6	0	1	#NULL!	#NULL!	0	3	0	0	#NULL!	#NULL!	0	#NULL!	1	#NULL!	#NULL!	1
433	1	0	#NULL!	4	1	1.434	3	1	0	1	0	1	0		0		35	1		0	0	3	0	0	0	3	0	0	0	0	1	0	24	0	1	#NULL!	#NULL!	0	1	1	1	#NULL!	#NULL!	0	#NULL!	#NULL!	#NULL!	#NULL!	0
434	1	15	38	4	1	3	#NULL!	1	0	8	0	1	0		0		32	1		0	0	2	2	0	0	2	0	0	0	0	1	1	4	0	1	#NULL!	0	0	3	1	0	2	1	0	1	1	#NULL!	#NULL!	1
435	0	0	36	4	1	2.5	3	1	0	3	3	0	0		0		33	1		0	0	4	2	0	0	2	0	0	0	0	1	1	11	0	1	#NULL!	#NULL!	0	2	0	1	#NULL!	#NULL!	0	#NULL!	1	1	0	1
436	1	0	30	4	0	1.74	3	1	2	22	0	0	0	g6pd def	0	nnj	42	1		0	0	5	2	0	0	2	0	0	0	0	1	1	7	0	1	#NULL!	0	0	2	#NULL!	0	1	1	0	1	1	1	0	0
437	1	0	40	5	0	3.088	#NULL!	1	2	3	1	0	0		0		20	1		1	0	1	2	0	0	2	0	0	0	0	1	1	1	0	1	#NULL!	0	0	3	1	0	4	5	0	4	1	1	0	1
438	1	10	40	4	1	#NULL!	#NULL!	1	0	4	#NULL!	1	0		0		37	1		1	0	5	0	0	0	3	0	0	0	0	1	0	5	0	1	#NULL!	0	0	#NULL!	0	0	3	5	0	4	1	1	0	1
439	1	10	#NULL!	4	0	4	#NULL!	1	0	22	0	0	0	g6pd def	0		26	1		0	0	1	2	0	0	2	0	0	0	0	1	1	2	0	1	#NULL!	#NULL!	0	3	0	0	2	4	0	2	1	1	0	1
440	0	0	40	4	0	2.928	#NULL!	1	0	3	2	0	0		0		26	2		1	0	1	2	0	0	2	0	0	0	0	1	1	1	0	2	#NULL!	#NULL!	0	3	0	0	4	5	0	4	1	1	0	1
441	0	3	40	4	0	3.75	#NULL!	1	0	2	0	0	0		0		27	1		1	0	1	1	0	0	2	0	0	0	0	1	1	5	0	1	#NULL!	#NULL!	0	3	1	0	1	2	0	1	1	1	0	1
442	1	0	39	4	1	2.9	#NULL!	#NULL!	2	3	3	0	0		0		36	1		0	0	1	0	0	0	3	0	0	0	0	1	0	8	0	2	#NULL!	0	0	3	1	0	2	2	0	1	1	1	0	1
443	0	7	99	4	0	2.4	#NULL!	1	0	22	0	0	0	g6pd def	0		#NULL!	2		0	0	#NULL!	#NULL!	#NULL!	#NULL!	#NULL!	0	0	0	0	1	1	3	0	1	#NULL!	#NULL!	0	2	#NULL!	0	#NULL!	#NULL!	#NULL!	#NULL!	#NULL!	#NULL!	#NULL!	1
444	0	28	99	4	1	#NULL!	#NULL!	1	0	4	0	0	0		0		#NULL!	1		0	0	#NULL!	4	#NULL!	#NULL!	#NULL!	#NULL!	#NULL!	#NULL!	#NULL!	1	#NULL!	8	0	2	#NULL!	#NULL!	0	#NULL!	#NULL!	0	1	#NULL!	0	2	1	1	0	1
445	0	2	99	4	0	2.446	1	1	0	4	0	0	0		0		27	1		1	0	1	#NULL!	#NULL!	#NULL!	#NULL!	#NULL!	#NULL!	#NULL!	0	1	#NULL!	2	0	2	#NULL!	0	0	2	1	0	3	4	0	2	1	1	0	1
446	0	0	99	4	0	3.5	3	1	2	7	0	#NULL!	1	DSD, CAH	0		33	1		0	0	3	0	0	#NULL!	3	1	#NULL!	#NULL!	0	1	#NULL!	4	0	1	#NULL!	#NULL!	1	3	0	0	1	4	0	1	1	1	0	1
447	1	0	99	4	0	3.32	2	1	2	22	2	0	0	g6pd def	0	nnj	23	1		0	0	2	4	#NULL!	#NULL!	#NULL!	#NULL!	#NULL!	#NULL!	#NULL!	1	1	14	0	1	#NULL!	0	0	3	0	0	1	5	0	1	1	#NULL!	#NULL!	1
448	0	0	30	4	0	2.206	#NULL!	1	2	1	1	0	0		0	nnj	#NULL!	1		0	0	#NULL!	#NULL!	#NULL!	#NULL!	#NULL!	#NULL!	#NULL!	#NULL!	#NULL!	1	#NULL!	9	0	1	#NULL!	0	0	2	1	0	3	4	0	3	1	#NULL!	#NULL!	1
449	1	19	99	4	0	#NULL!	4	1	0	4	0	0	0		0		39	2		1	0	4	4	#NULL!	#NULL!	#NULL!	#NULL!	#NULL!	#NULL!	#NULL!	1	1	2	0	1	#NULL!	#NULL!	0	#NULL!	0	0	2	#NULL!	0	2	1	1	0	1
450	1	0	99	4	0	3.36	2	1	0	3	1	0	0		0		#NULL!	1		0	0	2	#NULL!	#NULL!	#NULL!	#NULL!	#NULL!	#NULL!	#NULL!	#NULL!	1	#NULL!	1	0	1	#NULL!	#NULL!	0	3	0	0	1	1	0	1	1	#NULL!	#NULL!	1
451	0	0	34	4	1	1.88	1	1	0	1	0	0	0		0		29	1		0	0	1	#NULL!	#NULL!	#NULL!	#NULL!	#NULL!	#NULL!	#NULL!	#NULL!	1	#NULL!	4	0	1	#NULL!	#NULL!	0	2	0	0	4	5	#NULL!	5	0	#NULL!	#NULL!	1
452	1	3	99	4	1	2.04	1	1	0	7	0	0	1	CTEV	0		29	1		0	0	1	1	#NULL!	#NULL!	#NULL!	#NULL!	#NULL!	#NULL!	#NULL!	1	1	3	0	1	#NULL!	#NULL!	0	2	1	0	2	#NULL!	0	2	0	2	1	1
453	0	2	99	4	1	3.2	1	1	0	4	0	0	0		0		31	2		1	0	1	2	#NULL!	#NULL!	#NULL!	#NULL!	#NULL!	#NULL!	0	1	1	3	0	1	#NULL!	#NULL!	0	3	0	0	#NULL!	1	0	1	1	1	0	1
454	1	0	31	4	0	1.29	3	2	2	1	0	0	0		0	nnj	#NULL!	1		1	0	3	4	#NULL!	#NULL!	#NULL!	#NULL!	#NULL!	#NULL!	#NULL!	1	#NULL!	25	0	1	#NULL!	#NULL!	0	1	#NULL!	0	2	3	0	2	1	1	0	1
455	0	0	99	3	0	4.3	1	1	2	4	0	0	0		0	nnj	#NULL!	2		0	0	1	4	#NULL!	#NULL!	#NULL!	#NULL!	#NULL!	#NULL!	#NULL!	1	1	7	0	1	#NULL!	0	0	4	0	#NULL!	#NULL!	1	0	2	1	1	0	1
456	1	0	99	3	0	3.23	3	1	2	16	0	0	0		0		#NULL!	1		1	0	3	4	#NULL!	#NULL!	#NULL!	#NULL!	#NULL!	#NULL!	#NULL!	1	1	3	0	1	#NULL!	0	0	3	0	0	#NULL!	3	0	2	1	1	0	1
457	1	2	99	3	1	3.01	3	1	0	2	0	0	0		0		#NULL!	1		0	0	3	4	#NULL!	#NULL!	#NULL!	#NULL!	#NULL!	#NULL!	#NULL!	1	#NULL!	4	0	1	#NULL!	0	0	3	0	0	#NULL!	4	0	3	1	1	0	1
458	0	0	99	3	0	2.58	1	1	0	3	1	0	0		0		29	1		0	0	1	4	#NULL!	#NULL!	#NULL!	#NULL!	#NULL!	#NULL!	#NULL!	1	#NULL!	2	0	1	#NULL!	#NULL!	0	3	#NULL!	0	#NULL!	3	0	2	0	2	1	0
459	0	0	99	3	0	2.87	2	1	2	3	1	0	0		0	nnj	#NULL!	1		0	0	1	#NULL!	#NULL!	#NULL!	#NULL!	#NULL!	#NULL!	#NULL!	#NULL!	1	#NULL!	6	0	1	#NULL!	0	0	3	0	0	#NULL!	3	0	2	0	2	1	1
460	0	28	#NULL!	3	1	#NULL!	1	1	0	7	0	#NULL!	1	ACHD	0		23	1		0	0	1	4	#NULL!	#NULL!	#NULL!	#NULL!	#NULL!	#NULL!	#NULL!	1	#NULL!	6	0	1	#NULL!	0	1	#NULL!	#NULL!	0	#NULL!	1	0	1	1	1	0	1
461	0	2	99	3	1	2.6	3	1	0	13	0	0	0		0		26	2		1	0	3	4	#NULL!	#NULL!	#NULL!	#NULL!	#NULL!	#NULL!	#NULL!	1	#NULL!	4	0	1	#NULL!	#NULL!	0	3	0	0	1	4	0	1	#NULL!	#NULL!	#NULL!	1
462	1	0	99	4	1	3.54	2	1	0	3	3	0	0		0		#NULL!	2		0	0	1	4	#NULL!	#NULL!	#NULL!	#NULL!	#NULL!	#NULL!	0	1	1	5	0	1	#NULL!	#NULL!	0	3	0	0	1	#NULL!	0	1	1	1	0	1
463	1	2	99	4	1	2.5	1	1	0	2	0	0	0		0		24	1		1	0	1	4	1	#NULL!	#NULL!	#NULL!	#NULL!	#NULL!	0	1	#NULL!	10	0	1	#NULL!	#NULL!	0	2	0	0	4	#NULL!	0	5	1	2	1	1
464	1	0	99	4	0	4.2	2	1	2	7	0	0	1	hirschsprung's disease	0	sepsis	32	1		0	0	2	4	#NULL!	#NULL!	#NULL!	#NULL!	#NULL!	#NULL!	#NULL!	1	#NULL!	9	0	1	#NULL!	0	1	4	0	1	1	3	0	1	1	1	0	1
465	0	0	99	4	0	3.2	1	1	2	3	2	0	0		0	sepsis	30	1		0	0	1	2	#NULL!	#NULL!	#NULL!	#NULL!	#NULL!	#NULL!	0	1	1	6	0	1	#NULL!	#NULL!	0	3	1	0	#NULL!	4	0	5	1	1	0	1
466	0	0	99	4	0	2.5	#NULL!	1	2	3	2	0	0		0	nnj	#NULL!	1		0	0	#NULL!	4	#NULL!	#NULL!	#NULL!	#NULL!	#NULL!	#NULL!	#NULL!	1	#NULL!	15	0	1	#NULL!	#NULL!	0	2	0	0	#NULL!	#NULL!	0	#NULL!	#NULL!	#NULL!	#NULL!	1
467	1	0	99	4	0	3.5	2	1	2	3	2	0	0		0	sepsis	#NULL!	1		0	0	2	2	#NULL!	#NULL!	#NULL!	#NULL!	#NULL!	#NULL!	#NULL!	1	1	9	0	1	#NULL!	#NULL!	0	3	0	0	1	1	0	1	#NULL!	#NULL!	#NULL!	0
468	0	0	32	4	0	1.67	#NULL!	1	2	22	0	0	0	g6pd def	0	sepsis	#NULL!	2		0	0	#NULL!	4	#NULL!	#NULL!	#NULL!	#NULL!	#NULL!	#NULL!	#NULL!	1	#NULL!	21	0	1	#NULL!	#NULL!	0	2	0	0	4	4	1	4	1	1	0	1
469	0	22	#NULL!	4	1	#NULL!	#NULL!	1	0	7	0	0	1	biliary atresia	0		#NULL!	2		1	0	#NULL!	#NULL!	#NULL!	#NULL!	#NULL!	#NULL!	#NULL!	#NULL!	#NULL!	1	#NULL!	13	0	2	#NULL!	#NULL!	1	#NULL!	0	0	4	3	0	4	1	1	0	0
470	0	0	33	4	1	2	2	2	0	1	0	0	0		0	nnj	#NULL!	2		1	0	1	#NULL!	#NULL!	#NULL!	#NULL!	#NULL!	#NULL!	#NULL!	0	1	#NULL!	11	0	1	#NULL!	#NULL!	0	2	0	0	3	#NULL!	2	3	1	#NULL!	#NULL!	1
471	1	9	99	4	1	#NULL!	2	1	0	7	0	#NULL!	1	hypospadias, apert syndrome	0		26	1		0	0	2	3	#NULL!	#NULL!	#NULL!	#NULL!	#NULL!	#NULL!	1	1	#NULL!	8	0	1	#NULL!	#NULL!	1	#NULL!	#NULL!	1	3	#NULL!	0	#NULL!	1	1	0	1
472	1	6	32	4	1	#NULL!	5	1	0	22	0	1	0	g6pd def	0	sepsis	30	1		0	0	4	0	#NULL!	#NULL!	#NULL!	#NULL!	#NULL!	#NULL!	1	1	#NULL!	9	0	1	#NULL!	#NULL!	0	#NULL!	0	0	4	4	0	4	1	1	0	1
473	0	0	36	4	1	2.226	#NULL!	1	0	3	1	0	0		0		30	1		1	0	4	3	#NULL!	#NULL!	#NULL!	0	0	#NULL!	#NULL!	1	2	6	0	1	#NULL!	#NULL!	0	2	1	0	4	#NULL!	0	4	#NULL!	#NULL!	#NULL!	1
474	1	3	99	4	1	2.8	#NULL!	1	0	4	1	0	0		0	meningitis	25	1		0	0	#NULL!	2	#NULL!	#NULL!	#NULL!	#NULL!	0	0	0	1	1	10	0	1	#NULL!	#NULL!	0	3	1	0	1	4	0	1	1	#NULL!	#NULL!	1
475	1	5	#NULL!	5	1	#NULL!	#NULL!	1	#NULL!	2	0	0	0		0	sepsis	#NULL!	1		0	0	#NULL!	#NULL!	#NULL!	#NULL!	#NULL!	#NULL!	#NULL!	0	#NULL!	1	#NULL!	8	0	1	#NULL!	0	0	#NULL!	1	0	3	5	0	3	1	#NULL!	#NULL!	1
476	1	4	#NULL!	4	0	3.75	#NULL!	1	2	2	0	0	0		0		#NULL!	1		0	0	#NULL!	2	#NULL!	#NULL!	#NULL!	#NULL!	#NULL!	0	0	1	1	3	0	1	#NULL!	0	0	3	1	0	3	1	0	2	1	#NULL!	#NULL!	1
477	1	0	99	3	0	5.301	2	1	2	3	1	0	0		0	nnj	30	1		0	0	2	#NULL!	#NULL!	#NULL!	#NULL!	#NULL!	#NULL!	#NULL!	0	1	#NULL!	6	0	1	#NULL!	0	0	4	0	0	4	#NULL!	0	5	#NULL!	#NULL!	#NULL!	1
478	0	0	99	3	0	2.87	3	1	0	3	3	0	0		0		32	1		0	0	3	#NULL!	#NULL!	#NULL!	#NULL!	#NULL!	#NULL!	#NULL!	0	1	#NULL!	8	0	1	#NULL!	#NULL!	0	3	0	0	1	1	0	1	1	#NULL!	#NULL!	1
479	1	0	30	3	0	1.732	#NULL!	1	2	1	0	0	0		0		#NULL!	1		1	0	#NULL!	#NULL!	#NULL!	#NULL!	#NULL!	#NULL!	#NULL!	#NULL!	#NULL!	1	#NULL!	2	0	1	#NULL!	#NULL!	0	2	0	0	#NULL!	#NULL!	0	#NULL!	1	#NULL!	#NULL!	1
480	1	0	30	3	0	1.21	3	1	2	1	0	0	0		0	sepsis	30	1		0	0	2	#NULL!	#NULL!	#NULL!	#NULL!	#NULL!	#NULL!	#NULL!	#NULL!	1	#NULL!	27	0	1	#NULL!	#NULL!	0	1	0	1	2	#NULL!	0	2	#NULL!	#NULL!	#NULL!	1
481	0	4	99	3	1	3.3	1	1	0	18	0	0	0		0		#NULL!	1		0	1	1	4	#NULL!	#NULL!	#NULL!	#NULL!	#NULL!	#NULL!	0	1	1	10	0	1	#NULL!	#NULL!	0	3	0	0	1	#NULL!	0	1	#NULL!	#NULL!	#NULL!	1
482	0	0	#NULL!	3	0	1.59	1	1	0	3	3	0	0		0		32	2		0	0	1	#NULL!	#NULL!	#NULL!	#NULL!	#NULL!	#NULL!	#NULL!	#NULL!	1	#NULL!	4	0	1	#NULL!	#NULL!	0	2	0	0	1	#NULL!	0	2	1	#NULL!	#NULL!	1
483	0	0	36	3	1	2.67	1	1	2	1	0	0	0		0		#NULL!	1		0	0	1	4	#NULL!	#NULL!	#NULL!	#NULL!	#NULL!	#NULL!	#NULL!	1	#NULL!	3	0	1	#NULL!	#NULL!	0	3	0	0	2	#NULL!	0	2	1	#NULL!	#NULL!	1
484	0	3	99	3	0	2.88	1	1	0	2	0	0	0		0	sepsis	#NULL!	1		0	0	1	4	#NULL!	#NULL!	#NULL!	#NULL!	#NULL!	#NULL!	#NULL!	1	1	5	0	1	#NULL!	0	0	3	0	0	3	#NULL!	0	3	1	#NULL!	#NULL!	1
485	0	4	99	4	1	3.03	1	1	2	4	0	0	0		0		28	1		0	0	1	4	#NULL!	#NULL!	#NULL!	#NULL!	#NULL!	#NULL!	0	1	1	6	0	1	#NULL!	#NULL!	0	3	#NULL!	0	2	#NULL!	0	2	1	#NULL!	#NULL!	1
486	1	5	#NULL!	4	1	3.31	#NULL!	1	0	7	0	#NULL!	1	CTEV	0		35	1		0	0	4	#NULL!	#NULL!	#NULL!	#NULL!	#NULL!	#NULL!	#NULL!	#NULL!	1	1	13	0	1	#NULL!	#NULL!	0	3	#NULL!	0	#NULL!	#NULL!	#NULL!	#NULL!	1	#NULL!	#NULL!	1
487	1	0	99	4	0	3.2	#NULL!	1	0	3	1	0	0		0		#NULL!	1		0	0	#NULL!	#NULL!	#NULL!	#NULL!	#NULL!	0	0	0	0	1	1	2	0	1	#NULL!	#NULL!	0	3	1	0	#NULL!	#NULL!	0	2	0	2	1	1
488	0	1	#NULL!	4	0	2.016	1	1	2	11	0	0	0		0	sepsis	29	1		0	0	1	2	#NULL!	#NULL!	2	0	1	#NULL!	#NULL!	1	#NULL!	7	0	1	#NULL!	#NULL!	0	2	1	0	1	3	0	1	0	2	1	1
489	1	0	#NULL!	4	1	3.91	#NULL!	#NULL!	0	3	2	#NULL!	0		0	sepsis	#NULL!	2		0	0	#NULL!	#NULL!	#NULL!	#NULL!	#NULL!	0	0	0	0	1	1	7	0	1	#NULL!	#NULL!	0	3	1	0	#NULL!	4	0	2	1	1	0	1
490	0	10	99	4	0	#NULL!	#NULL!	1	0	2	0	0	0		0	sepsis	#NULL!	1		0	1	4	#NULL!	#NULL!	#NULL!	#NULL!	0	0	0	#NULL!	1	#NULL!	7	0	1	#NULL!	#NULL!	0	#NULL!	#NULL!	0	#NULL!	3	0	1	1	1	0	1
491	0	8	99	4	1	#NULL!	#NULL!	1	2	2	0	0	0		0		#NULL!	#NULL!		#NULL!	0	#NULL!	#NULL!	#NULL!	#NULL!	#NULL!	#NULL!	#NULL!	#NULL!	#NULL!	1	#NULL!	5	0	1	#NULL!	#NULL!	0	#NULL!	0	0	#NULL!	5	0	1	1	1	0	1
492	1	2	40	4	1	3.2	#NULL!	1	0	3	3	0	0		0		36	2		0	0	1	2	0	0	2	0	0	0	0	1	1	10	0	1	#NULL!	#NULL!	0	3	#NULL!	0	3	4	0	3	0	2	1	1
493	0	8	#NULL!	4	0	2.7	#NULL!	1	2	2	0	0	0		0		37	2		0	0	2	2	0	0	2	0	0	0	0	1	1	3	0	1	#NULL!	#NULL!	0	3	0	1	#NULL!	4	0	2	1	1	0	1
494	1	0	34	4	0	2.2	#NULL!	1	0	2	0	#NULL!	0		0		#NULL!	1		0	0	3	3	0	0	2	0	0	#NULL!	1	1	#NULL!	7	0	1	#NULL!	#NULL!	0	2	1	0	3	4	0	4	1	1	0	1
495	0	3	32	4	1	1.8	#NULL!	2	0	22	0	0	0	g6pd def	0		27	1		0	0	2	0	0	0	3	0	0	0	0	1	0	20	0	1	#NULL!	#NULL!	0	2	0	0	3	#NULL!	0	3	1	1	0	0
496	0	4	38	4	0	3.2	1	1	0	4	0	0	0		0		27	1		0	0	1	2	0	0	2	0	0	0	0	1	1	2	0	1	#NULL!	0	0	3	1	0	3	6	0	5	1	1	0	1
497	0	0	38	4	0	3.192	#NULL!	1	2	19	0	0	0		0		28	1		0	0	2	2	0	0	2	0	0	0	0	1	1	2	0	1	#NULL!	#NULL!	0	3	0	0	#NULL!	2	0	1	1	1	0	1
498	1	5	#NULL!	4	0	#NULL!	1	1	0	2	0	0	0		0		#NULL!	1		1	0	1	4	0	0	2	0	0	0	0	1	1	6	0	1	#NULL!	#NULL!	0	#NULL!	0	1	#NULL!	5	0	5	0	2	1	1
499	1	0	38	4	1	3.38	4	1	0	3	2	0	0		0		38	1		0	#NULL!	4	4	0	0	#NULL!	0	0	0	0	1	1	2	0	1	#NULL!	#NULL!	0	3	#NULL!	1	#NULL!	3	0	1	1	1	0	1
500	1	1	#NULL!	4	1	2.5	1	1	2	3	3	0	0		0		23	1	tailoring	0	0	1	4	0	0	#NULL!	0	0	0	0	1	1	8	0	1	#NULL!	#NULL!	0	2	0	0	#NULL!	3	0	1	1	1	0	0
501	1	1	#NULL!	4	1	3	4	1	0	3	3	0	0		0		35	1		0	#NULL!	6	1	0	0	1	0	0	0	0	1	1	6	0	1	#NULL!	0	0	3	0	0	#NULL!	3	0	1	1	1	0	1
502	1	0	99	4	0	3.2	1	1	0	3	1	0	0		0		25	1		0	0	1	4	0	0	2	0	0	0	0	1	1	1	0	1	#NULL!	#NULL!	0	3	0	0	#NULL!	5	0	1	0	2	1	0
503	0	0	33	4	0	1.85	3	1	0	1	0	0	0		0	nnj	#NULL!	#NULL!		#NULL!	#NULL!	3	4	0	0	2	0	0	0	0	1	1	20	0	1	#NULL!	#NULL!	0	2	0	0	#NULL!	#NULL!	0	#NULL!	#NULL!	#NULL!	#NULL!	1
504	1	4	42	4	1	3.3	4	1	0	2	0	0	0		0		39	2		0	0	4	3	0	0	2	0	0	0	0	1	1	6	0	1	#NULL!	#NULL!	0	3	0	1	#NULL!	#NULL!	0	#NULL!	1	#NULL!	#NULL!	0
505	1	6	#NULL!	4	1	#NULL!	1	1	0	4	0	0	0		0	nnj	26	2		1	0	1	#NULL!	0	0	#NULL!	#NULL!	#NULL!	#NULL!	#NULL!	1	#NULL!	6	0	1	#NULL!	#NULL!	0	#NULL!	0	0	1	3	0	1	#NULL!	#NULL!	#NULL!	0
506	1	4	#NULL!	4	1	1.3	1	1	0	1	0	0	0		0	nnj	38	1		0	0	2	4	0	0	#NULL!	0	0	0	0	1	1	3	0	1	#NULL!	#NULL!	0	1	0	0	3	4	0	3	0	2	1	1
507	1	0	35	4	0	2.55	4	1	2	19	0	0	0		0		#NULL!	2		0	0	4	4	0	0	#NULL!	0	0	0	0	1	#NULL!	3	0	1	#NULL!	0	0	3	0	0	2	1	0	2	1	#NULL!	#NULL!	1
508	0	3	99	4	0	3.55	4	1	0	2	0	0	0		0		#NULL!	1		0	0	4	4	0	0	2	0	0	0	0	1	1	2	0	1	#NULL!	#NULL!	0	3	1	0	#NULL!	#NULL!	0	#NULL!	#NULL!	#NULL!	#NULL!	1
509	1	0	35	4	0	3.3	1	1	2	5	0	0	0		0		25	1		0	0	1	4	0	0	#NULL!	0	1	0	0	1	1	4	0	1	#NULL!	#NULL!	0	3	0	1	4	5	0	4	1	#NULL!	#NULL!	1
510	0	0	32	4	0	1.86	#NULL!	1	0	1	0	0	0		0		31	2		0	0	1	2	0	0	2	0	0	0	0	1	1	20	0	1	#NULL!	#NULL!	0	2	0	0	2	#NULL!	0	2	#NULL!	#NULL!	#NULL!	1
511	1	11	#NULL!	4	1	#NULL!	1	1	0	8	1	0	0		0		#NULL!	1	teaching	0	0	1	4	0	0	#NULL!	0	0	0	0	1	1	7	0	1	#NULL!	0	0	#NULL!	1	0	1	3	0	1	#NULL!	#NULL!	#NULL!	1
512	1	2	38	4	0	2.42	2	2	2	2	0	0	0		0		#NULL!	1		0	0	2	4	0	0	2	0	0	0	0	1	1	4	0	1	#NULL!	#NULL!	0	2	0	0	1	3	0	1	1	#NULL!	#NULL!	1
513	0	2	38	4	0	2.7	3	2	2	2	0	0	0		0		#NULL!	1		0	0	2	4	0	0	2	0	0	0	0	1	2	8	0	1	#NULL!	#NULL!	0	3	0	0	1	4	0	1	1	#NULL!	#NULL!	1
514	1	3	99	4	1	2.9	2	1	0	7	0	1	1	ARM and UDT	0		#NULL!	1		1	0	2	0	0	0	#NULL!	#NULL!	#NULL!	#NULL!	0	1	0	9	0	1	#NULL!	0	1	3	#NULL!	0	1	3	0	1	1	#NULL!	#NULL!	1
515	0	2	38	4	0	2.5	3	2	0	5	0	0	0		0		34	1		0	0	3	3	0	0	2	0	0	0	0	1	1	1	0	1	#NULL!	#NULL!	0	2	1	0	3	#NULL!	0	3	1	#NULL!	#NULL!	1
516	1	2	38	4	0	2.8	4	2	0	5	0	0	0		0		34	1		0	0	3	3	0	0	2	0	0	0	0	1	1	1	0	1	#NULL!	#NULL!	0	3	0	0	1	#NULL!	0	1	1	#NULL!	#NULL!	1
517	0	1	38	4	0	3.4	1	1	0	5	0	0	0		0		28	1		0	0	1	3	0	0	3	0	0	0	0	1	0	5	0	1	#NULL!	#NULL!	0	3	0	0	3	#NULL!	0	3	1	#NULL!	#NULL!	1
518	0	0	34	4	0	1.81	4	1	2	1	2	#NULL!	0		0	nnj	35	1		0	0	4	1	0	0	1	0	0	0	0	1	1	12	0	1	#NULL!	0	0	2	0	0	3	#NULL!	0	3	1	#NULL!	#NULL!	1
519	0	0	38	4	0	5	3	1	0	6	0	0	0		0		#NULL!	1		0	0	3	4	0	0	2	0	0	0	0	1	1	3	0	2	#NULL!	#NULL!	0	4	0	0	1	3	0	1	1	#NULL!	#NULL!	1
520	1	1	#NULL!	4	1	2.312	4	1	0	3	2	0	0		0		#NULL!	2		0	0	4	4	0	0	#NULL!	0	0	0	0	#NULL!	1	8	0	1	#NULL!	#NULL!	0	2	0	0	2	#NULL!	0	1	#NULL!	#NULL!	#NULL!	1
521	1	10	#NULL!	4	1	#NULL!	1	1	0	7	0	0	1	omphalocoele	0		30	1		0	0	1	2	0	0	2	0	0	0	0	1	1	8	0	1	#NULL!	#NULL!	1	#NULL!	#NULL!	0	1	3	1	#NULL!	1	1	0	0
522	1	17	99	4	1	#NULL!	#NULL!	1	0	4	0	0	0		0		#NULL!	1		0	0	#NULL!	2	0	0	2	0	0	0	0	1	1	4	0	1	#NULL!	#NULL!	0	#NULL!	#NULL!	1	1	1	0	1	1	#NULL!	#NULL!	1
523	1	15	#NULL!	4	0	#NULL!	1	1	0	4	0	0	0		0		28	1	teaching	0	0	1	2	0	0	2	0	0	0	0	1	1	4	0	1	#NULL!	#NULL!	0	#NULL!	0	0	3	3	0	3	1	#NULL!	#NULL!	1
524	0	0	32	4	0	1.396	3	2	0	1	0	0	0		0		#NULL!	1		0	0	3	#NULL!	#NULL!	#NULL!	#NULL!	#NULL!	#NULL!	#NULL!	#NULL!	1	#NULL!	27	0	1	#NULL!	#NULL!	0	1	0	0	2	#NULL!	0	1	1	#NULL!	#NULL!	1
525	0	0	36	4	0	2.52	1	1	0	4	0	0	0		0		#NULL!	1		0	0	1	4	0	0	2	0	0	0	0	1	1	4	0	1	#NULL!	0	0	3	0	0	1	1	0	1	1	#NULL!	#NULL!	1
526	0	2	99	4	0	2.3	1	1	0	22	0	0	0	g6pd def	0		#NULL!	1		1	2	1	4	0	0	2	0	0	#NULL!	0	#NULL!	1	4	0	1	#NULL!	0	0	2	0	0	1	3	#NULL!	1	1	1	0	1
527	1	0	#NULL!	4	1	#NULL!	#NULL!	1	2	3	3	0	0		0		22	2		1	0	#NULL!	2	0	0	2	0	0	0	0	1	1	1	1	4	1	1	0	#NULL!	0	0	2	4	0	2	1	#NULL!	#NULL!	1
528	1	0	39	4	1	3.2	#NULL!	1	0	3	3	0	0		0		27	1		1	0	2	0	0	0	3	0	0	0	0	1	0	12	0	1	#NULL!	#NULL!	0	3	0	0	1	3	0	1	1	#NULL!	#NULL!	1
529	1	0	35	4	1	2	#NULL!	1	0	3	2	0	0		0		26	1		1	0	3	2	0	0	2	0	0	0	0	1	1	8	0	1	#NULL!	#NULL!	0	2	0	0	#NULL!	#NULL!	0	#NULL!	1	#NULL!	#NULL!	1
530	1	2	41	4	1	2.75	#NULL!	1	0	4	0	0	0		0		36	2		1	0	1	2	0	0	2	0	0	0	0	1	1	7	0	1	#NULL!	0	0	3	0	0	2	#NULL!	0	2	1	#NULL!	#NULL!	1
531	1	6	38	4	0	2.5	#NULL!	1	0	2	0	0	0		0		18	1		0	0	1	2	0	0	2	0	0	0	0	0	1	10	0	1	#NULL!	#NULL!	0	2	1	0	#NULL!	#NULL!	0	#NULL!	1	#NULL!	#NULL!	1
532	0	6	38	4	0	3.2	#NULL!	1	0	2	0	0	0		0		26	1		1	0	2	2	0	0	2	0	0	0	0	1	1	2	0	1	#NULL!	#NULL!	0	3	#NULL!	1	#NULL!	#NULL!	0	#NULL!	#NULL!	#NULL!	#NULL!	0
533	0	0	31	4	0	1.69	#NULL!	1	0	1	0	0	0		0		25	1		1	0	2	0	0	0	3	0	0	0	0	1	0	6	0	1	#NULL!	#NULL!	0	2	1	0	2	#NULL!	0	1	#NULL!	#NULL!	#NULL!	1
534	0	3	#NULL!	4	0	3.544	#NULL!	1	0	19	0	0	0		0		25	1		0	0	1	2	0	0	2	0	0	0	0	1	1	2	0	1	#NULL!	0	0	3	0	1	2	3	0	2	1	#NULL!	#NULL!	1
535	1	7	38	4	0	3.3	#NULL!	1	0	4	0	0	0		0		39	1		0	0	2	2	0	0	2	0	0	0	0	1	1	2	0	1	#NULL!	#NULL!	0	3	1	0	4	3	0	4	0	#NULL!	#NULL!	1
536	0	1	38	4	0	3.45	#NULL!	1	2	3	2	0	0		0		26	1		0	0	1	2	0	0	2	0	0	0	0	1	1	2	0	1	#NULL!	#NULL!	0	3	1	0	#NULL!	3	0	4	1	#NULL!	#NULL!	1
537	1	1	38	4	0	2.64	#NULL!	1	2	10	0	0	0		0		30	1		0	0	3	2	0	0	2	0	0	0	0	1	1	2	0	1	#NULL!	#NULL!	0	3	0	0	#NULL!	1	0	#NULL!	1	#NULL!	#NULL!	1
538	1	3	38	4	0	4.2	#NULL!	1	0	2	0	#NULL!	0		0		37	1		1	0	2	2	0	0	2	0	0	0	0	1	1	3	0	1	#NULL!	#NULL!	0	4	#NULL!	0	#NULL!	#NULL!	0	#NULL!	#NULL!	#NULL!	#NULL!	1
539	1	0	35	4	0	1.9	#NULL!	1	2	1	0	0	0		0		27	1		0	0	1	2	0	0	2	0	0	0	0	1	2	5	0	1	#NULL!	0	0	2	#NULL!	0	#NULL!	#NULL!	0	#NULL!	1	#NULL!	#NULL!	1
540	1	0	#NULL!	4	0	1.3	#NULL!	2	2	1	0	0	0		0		34	1		1	1	3	2	0	0	2	0	0	0	0	1	1	6	0	1	#NULL!	#NULL!	0	1	0	0	2	3	0	2	#NULL!	#NULL!	#NULL!	1
541	1	1	#NULL!	4	0	1.962	#NULL!	2	2	1	0	0	0		0		34	1		0	0	3	2	0	0	2	0	0	0	0	1	1	5	0	1	#NULL!	#NULL!	0	2	0	0	3	4	0	3	#NULL!	#NULL!	#NULL!	1
542	1	0	40	4	0	2.54	#NULL!	1	2	3	1	0	0		0		38	1		0	0	3	2	0	0	2	0	0	0	0	1	1	3	0	1	#NULL!	#NULL!	0	3	1	0	#NULL!	#NULL!	0	#NULL!	#NULL!	#NULL!	#NULL!	1
543	1	0	38	4	1	3.3	#NULL!	1	0	3	2	0	0		0		25	1		0	0	2	2	0	0	2	0	0	0	0	1	1	7	0	1	#NULL!	#NULL!	0	3	1	0	3	3	0	2	#NULL!	#NULL!	#NULL!	1
544	1	6	38	4	1	4	#NULL!	1	0	2	0	0	0		0		26	1		0	0	2	2	0	0	2	0	0	0	0	1	1	5	0	1	#NULL!	#NULL!	0	3	0	0	1	#NULL!	1	1	1	#NULL!	#NULL!	1
545	0	1	32	4	1	1.1	#NULL!	2	0	1	0	1	0		0		22	1		1	0	2	2	0	0	2	0	0	0	0	1	1	27	0	1	#NULL!	#NULL!	0	1	#NULL!	0	1	4	0	1	#NULL!	#NULL!	#NULL!	1
546	1	0	32	4	1	1.2	#NULL!	2	0	1	0	1	0		0		22	1		1	0	2	2	0	0	2	0	0	0	0	1	1	27	0	1	#NULL!	#NULL!	0	1	1	0	1	#NULL!	0	1	1	#NULL!	#NULL!	1
547	1	0	37	4	1	1.6	#NULL!	2	0	1	0	0	0		0		27	#NULL!		0	0	2	2	0	0	2	0	0	0	0	1	1	6	0	1	#NULL!	#NULL!	0	2	0	0	1	#NULL!	0	1	1	#NULL!	#NULL!	1
548	0	0	99	4	0	2.02	1	1	2	3	2	0	0		0		33	1		0	0	1	3	0	0	3	0	0	0	0	1	1	2	0	1	#NULL!	0	0	2	0	0	1	3	0	1	1	#NULL!	#NULL!	1
549	1	7	#NULL!	4	0	#NULL!	2	1	2	2	0	0	0		0		33	#NULL!		#NULL!	#NULL!	2	4	0	0	#NULL!	0	0	0	0	1	1	2	0	1	#NULL!	#NULL!	0	#NULL!	#NULL!	0	#NULL!	4	0	4	#NULL!	#NULL!	#NULL!	1
550	1	6	99	4	1	#NULL!	#NULL!	2	0	9	0	0	0		0		32	1		0	0	2	2	0	0	#NULL!	0	0	0	0	0	1	8	0	1	#NULL!	#NULL!	0	#NULL!	0	0	#NULL!	#NULL!	0	#NULL!	#NULL!	#NULL!	#NULL!	1
551	1	1	99	4	0	2.6	1	1	0	19	0	0	0		0		#NULL!	2		0	0	2	2	0	0	2	0	0	0	0	1	#NULL!	17	0	1	#NULL!	0	0	3	#NULL!	0	1	3	0	1	1	1	0	1
552	1	18	#NULL!	4	#NULL!	#NULL!	#NULL!	1	0	17	0	#NULL!	0		0	otitis media	#NULL!	1		0	0	#NULL!	#NULL!	#NULL!	#NULL!	#NULL!	#NULL!	#NULL!	#NULL!	#NULL!	#NULL!	#NULL!	7	0	1	#NULL!	#NULL!	0	#NULL!	#NULL!	0	#NULL!	#NULL!	0	#NULL!	#NULL!	#NULL!	#NULL!	1
553	1	3	35	4	1	2	1	1	0	4	3	1	0		0	nnj	23	1		0	0	1	0	0	0	#NULL!	0	0	0	0	1	1	38	1	4	41	1	0	2	0	1	#NULL!	#NULL!	1	4	#NULL!	#NULL!	#NULL!	1
554	1	2	#NULL!	4	1	2.07	3	2	0	22	3	0	0	g6pd def	0		34	1		0	0	2	1	0	0	1	0	0	0	0	1	1	7	0	1	#NULL!	0	0	2	0	0	1	2	0	1	#NULL!	#NULL!	#NULL!	1
555	1	6	#NULL!	4	1	#NULL!	#NULL!	1	0	2	0	0	0		0		26	1	photography	0	0	#NULL!	2	0	0	2	0	0	0	0	1	1	4	0	1	#NULL!	#NULL!	0	#NULL!	0	1	#NULL!	#NULL!	0	#NULL!	#NULL!	#NULL!	#NULL!	1
556	0	9	36	4	1	#NULL!	1	1	0	7	1	1	1	down's syndrome	0		#NULL!	2		0	0	1	2	0	0	#NULL!	0	0	0	0	#NULL!	1	2	0	1	#NULL!	0	1	#NULL!	0	0	1	1	0	1	0	2	1	1
557	1	10	99	4	1	#NULL!	#NULL!	1	2	2	0	#NULL!	0		0		#NULL!	2		0	#NULL!	#NULL!	#NULL!	#NULL!	#NULL!	#NULL!	#NULL!	#NULL!	#NULL!	#NULL!	#NULL!	#NULL!	2	0	1	#NULL!	#NULL!	0	#NULL!	0	0	#NULL!	5	0	1	1	1	0	1
558	0	0	#NULL!	4	0	2.6	2	1	2	16	2	0	0		0		22	#NULL!		0	#NULL!	2	2	0	0	2	0	0	0	0	#NULL!	1	5	0	1	#NULL!	#NULL!	0	3	#NULL!	1	#NULL!	5	0	2	1	1	0	1
559	1	11	#NULL!	4	1	#NULL!	#NULL!	1	0	3	3	1	0		0		#NULL!	1		0	0	#NULL!	#NULL!	#NULL!	#NULL!	#NULL!	#NULL!	#NULL!	#NULL!	#NULL!	#NULL!	0	1	1	4	12	1	0	#NULL!	1	0	#NULL!	#NULL!	0	3	1	1	0	1
560	1	0	#NULL!	4	1	3	2	1	2	3	2	0	0		0		23	1		0	#NULL!	2	#NULL!	#NULL!	#NULL!	#NULL!	#NULL!	#NULL!	#NULL!	#NULL!	#NULL!	#NULL!	4	0	1	#NULL!	#NULL!	0	3	1	0	#NULL!	3	0	2	0	2	1	1
561	1	0	99	4	0	2.632	1	1	2	10	0	0	0		0		21	1		1	0	1	4	0	0	2	0	0	0	0	1	1	1	0	1	#NULL!	#NULL!	0	3	0	0	1	3	0	1	1	1	0	1
562	0	20	36	4	#NULL!	#NULL!	#NULL!	1	0	7	#NULL!	0	1	hirschsprung's disease	0		25	1	patent medicine	0	0	1	#NULL!	#NULL!	#NULL!	#NULL!	#NULL!	#NULL!	#NULL!	#NULL!	#NULL!	#NULL!	2	0	1	#NULL!	#NULL!	1	#NULL!	1	0	1	3	0	1	1	1	0	1
563	1	23	#NULL!	4	1	#NULL!	4	1	0	4	#NULL!	0	0		0		30	2		0	0	4	4	0	0	2	0	0	0	0	1	1	7	0	1	#NULL!	#NULL!	0	#NULL!	0	0	#NULL!	3	0	2	1	1	0	1
564	1	0	#NULL!	4	0	3.5	1	1	0	3	1	0	0		0		23	1		1	0	2	4	0	0	2	0	0	0	0	1	1	1	0	1	#NULL!	#NULL!	0	3	#NULL!	0	1	#NULL!	0	1	1	1	0	1
565	1	9	99	4	1	#NULL!	1	1	0	7	0	0	1	CTEV	0	aspiration pneumonitis	27	1		0	0	#NULL!	4	0	0	2	0	0	0	0	1	1	8	0	1	#NULL!	#NULL!	0	#NULL!	0	0	1	1	0	1	1	1	0	1
566	0	12	99	4	1	3	1	1	0	2	0	0	0		0		28	2		0	0	1	2	0	0	2	0	0	0	0	1	1	1	0	1	#NULL!	#NULL!	0	3	0	0	4	5	#NULL!	4	1	#NULL!	#NULL!	1
567	0	0	31	4	0	1.756	2	1	2	1	3	0	0		0		25	2		1	0	2	#NULL!	#NULL!	#NULL!	#NULL!	#NULL!	#NULL!	#NULL!	#NULL!	#NULL!	#NULL!	6	0	1	#NULL!	#NULL!	0	2	#NULL!	0	1	1	0	1	1	#NULL!	#NULL!	1
568	1	0	38	4	0	2.854	1	1	0	2	0	0	0		0		28	1		0	0	1	2	0	0	2	0	0	0	0	1	1	13	0	1	#NULL!	#NULL!	0	3	#NULL!	0	4	4	#NULL!	6	1	0	0	1
569	1	4	40	4	0	3.9	3	1	2	2	0	0	0		0		37	1		0	0	3	1	0	0	2	0	0	0	1	1	1	2	0	1	#NULL!	#NULL!	0	3	0	0	1	1	0	1	1	1	0	1
570	0	2	99	4	0	3.5	#NULL!	1	2	22	0	0	0	g6pd def	0		#NULL!	1		0	#NULL!	#NULL!	2	0	0	2	0	0	0	0	1	#NULL!	6	0	1	#NULL!	#NULL!	0	3	#NULL!	0	1	3	0	1	1	1	0	0
571	1	0	29	4	1	0.9	4	1	0	1	0	0	0		0		34	1		1	0	4	2	0	0	#NULL!	0	1	0	0	1	#NULL!	9	0	2	#NULL!	#NULL!	0	0	1	0	3	#NULL!	#NULL!	3	1	1	0	1
572	0	3	#NULL!	4	1	3.1	4	1	0	2	0	0	0		0		39	1		0	0	4	2	0	0	2	0	0	0	0	1	1	3	0	1	#NULL!	#NULL!	0	3	0	0	4	5	0	4	1	1	0	1
573	0	3	38	4	1	3.1	1	1	0	4	0	0	0		0		22	2	trading	1	0	1	#NULL!	#NULL!	#NULL!	#NULL!	#NULL!	#NULL!	#NULL!	0	1	#NULL!	1	1	4	4	1	0	3	#NULL!	0	1	3	0	1	#NULL!	#NULL!	#NULL!	1
574	1	0	37	4	0	2.58	#NULL!	1	0	3	2	0	0		0		#NULL!	1		0	#NULL!	#NULL!	2	0	0	2	0	0	0	0	1	1	5	0	1	#NULL!	#NULL!	0	3	#NULL!	0	1	5	0	2	1	#NULL!	#NULL!	1
575	1	3	99	4	1	3.2	1	1	0	3	3	0	0		0	nnj	27	1		0	#NULL!	1	2	0	0	#NULL!	0	0	0	0	1	1	7	0	1	#NULL!	#NULL!	0	3	1	0	4	#NULL!	0	4	1	#NULL!	#NULL!	1
576	1	1	39	4	0	2.5	1	1	2	2	0	0	0		0		29	1		0	#NULL!	1	2	0	0	2	0	0	0	0	1	1	3	0	1	#NULL!	0	0	2	0	0	4	#NULL!	0	4	1	1	0	1
577	0	3	39	4	1	2.5	#NULL!	1	0	4	0	0	0		0		28	1		0	0	2	2	0	0	2	0	0	0	0	1	#NULL!	3	0	1	#NULL!	#NULL!	0	2	1	0	1	1	0	1	1	#NULL!	#NULL!	1
578	1	0	30	4	1	1.2	#NULL!	1	2	1	0	0	0		0		27	1		0	0	2	2	0	0	2	0	0	0	0	1	1	21	0	1	#NULL!	#NULL!	0	1	1	0	#NULL!	4	0	1	1	1	0	1
579	0	0	38	4	0	3.6	#NULL!	1	2	5	0	0	0		0		26	2		0	0	2	2	0	0	2	0	0	0	0	1	1	7	0	1	#NULL!	#NULL!	0	3	#NULL!	1	1	#NULL!	0	1	1	#NULL!	#NULL!	1
580	1	3	#NULL!	4	1	2.1	#NULL!	1	0	3	3	1	0		0		27	1		0	0	2	0	0	0	3	0	0	0	0	1	0	9	0	1	#NULL!	#NULL!	0	2	0	0	2	#NULL!	0	2	1	1	0	1
581	0	0	37	4	0	2.8	2	1	2	0	0	0	0		0		37	1		0	0	2	2	0	0	2	0	0	0	0	1	1	2	0	1	#NULL!	#NULL!	0	3	0	0	3	#NULL!	0	2	1	1	0	1
582	1	0	38	4	0	5.5	#NULL!	1	2	6	0	0	0		0		40	1		0	0	5	2	0	0	2	0	0	0	0	1	1	3	0	1	#NULL!	#NULL!	0	4	0	0	2	#NULL!	0	2	0	#NULL!	#NULL!	1
583	1	0	#NULL!	4	0	4.3	#NULL!	1	2	3	2	0	0		0		26	1		0	0	2	2	0	0	2	0	0	0	0	1	1	20	0	1	#NULL!	#NULL!	0	4	0	0	3	4	0	3	1	1	0	1
584	1	1	#NULL!	4	1	3.1	#NULL!	1	0	3	2	1	0		0		25	1		1	0	2	2	0	0	2	0	0	0	0	1	1	2	0	1	#NULL!	#NULL!	0	3	0	0	4	4	0	3	1	1	0	1
585	1	5	#NULL!	4	0	#NULL!	#NULL!	1	2	2	0	0	0		0		25	1		0	0	1	2	0	0	2	0	0	0	0	1	1	2	0	1	#NULL!	#NULL!	0	#NULL!	0	0	1	3	0	1	1	2	1	1
586	1	0	#NULL!	4	1	2.5	#NULL!	1	0	3	2	0	0		0		41	1		1	0	1	2	0	0	2	0	0	0	0	1	1	10	0	1	#NULL!	#NULL!	0	2	1	0	4	4	0	4	1	0	0	1
587	1	2	#NULL!	4	1	2.8	#NULL!	1	2	3	1	0	0		0	sepsis	20	1		0	0	1	2	0	0	2	0	0	0	0	1	1	10	0	1	#NULL!	#NULL!	0	3	0	0	3	#NULL!	0	3	1	1	0	0
588	0	1	38	5	0	3.3	#NULL!	1	0	10	0	0	0		0		32	1		0	0	2	2	0	0	2	0	0	0	0	1	1	3	0	1	#NULL!	#NULL!	0	3	#NULL!	0	4	#NULL!	0	4	1	#NULL!	#NULL!	1
589	1	1	#NULL!	5	0	2.994	#NULL!	1	0	3	2	0	0		0		32	#NULL!		0	0	2	2	0	0	2	0	0	0	0	1	1	6	0	1	#NULL!	#NULL!	0	3	#NULL!	1	1	3	0	1	1	1	0	1
590	1	1	#NULL!	5	1	3.1	#NULL!	1	2	3	2	0	0		0		37	#NULL!		0	0	3	0	#NULL!	#NULL!	3	0	0	0	0	1	0	13	0	1	#NULL!	#NULL!	0	3	0	1	#NULL!	#NULL!	0	#NULL!	1	1	0	1
591	1	4	#NULL!	5	0	#NULL!	#NULL!	1	0	2	0	0	0		0		27	1		0	0	2	2	0	0	2	0	0	0	0	1	1	4	0	1	#NULL!	#NULL!	0	#NULL!	#NULL!	1	1	3	0	1	1	1	0	1
592	1	1	#NULL!	5	1	2.14	#NULL!	1	0	3	3	#NULL!	0		0		#NULL!	1		0	0	2	0	0	0	3	0	0	0	0	1	0	14	0	1	#NULL!	#NULL!	0	2	1	0	3	#NULL!	0	3	#NULL!	#NULL!	#NULL!	1
593	1	1	#NULL!	5	1	2.8	#NULL!	1	0	3	3	0	0		0		38	1		0	0	1	2	0	0	2	0	0	0	0	1	1	1	0	2	#NULL!	#NULL!	0	3	1	0	1	#NULL!	0	1	1	1	0	1
594	0	1	33	5	0	1.76	#NULL!	1	0	1	0	0	0		0		31	1		0	0	#NULL!	2	0	0	2	0	0	0	0	1	1	10	0	1	#NULL!	#NULL!	0	2	0	0	1	#NULL!	2	1	1	1	0	1
595	1	0	30	5	0	1.56	#NULL!	1	0	1	0	0	0		0		37	#NULL!		0	0	3	2	0	0	2	0	0	0	0	1	1	16	0	1	#NULL!	0	0	2	#NULL!	0	#NULL!	1	0	#NULL!	1	1	0	0
596	1	4	#NULL!	4	0	2.9	#NULL!	1	2	2	0	0	0		0		32	1		1	0	2	2	0	0	2	0	0	0	0	1	1	3	0	1	#NULL!	#NULL!	0	3	0	0	#NULL!	3	0	2	0	2	1	1
597	0	2	30	4	0	1.3	#NULL!	1	2	1	0	0	0		0		27	1		0	0	1	2	0	0	2	0	0	0	0	1	1	17	0	1	#NULL!	#NULL!	0	1	1	0	#NULL!	3	0	3	1	1	0	1
598	1	1	39	5	1	3.6	#NULL!	1	0	3	2	0	0		0		29	#NULL!		1	0	2	2	0	0	2	0	0	0	0	1	1	7	0	1	#NULL!	#NULL!	0	3	0	0	#NULL!	5	0	1	1	1	0	1
599	1	1	#NULL!	5	1	2.668	#NULL!	1	2	3	2	0	0		0		34	2		0	0	2	2	0	0	2	0	0	0	0	1	1	5	0	1	#NULL!	#NULL!	0	3	0	0	#NULL!	2	0	1	1	1	0	1
600	0	10	#NULL!	5	1	#NULL!	#NULL!	1	0	2	0	0	0		0		#NULL!	1		0	0	3	2	0	0	2	0	0	0	0	1	1	11	0	1	#NULL!	#NULL!	0	#NULL!	0	0	#NULL!	3	0	2	1	1	0	1
601	0	7	38	5	1	3.2	#NULL!	1	0	13	0	0	0		0		27	1		0	0	2	0	0	0	3	0	0	0	0	1	0	3	0	1	#NULL!	#NULL!	0	3	1	0	#NULL!	1	0	2	0	2	1	1
602	1	0	#NULL!	5	0	3	#NULL!	1	0	22	0	0	0	g6pd def	0		#NULL!	#NULL!		0	0	#NULL!	2	0	0	2	0	0	0	0	1	1	3	0	1	#NULL!	#NULL!	0	3	0	0	1	4	0	1	1	1	0	1
603	1	3	38	5	0	3.6	#NULL!	1	0	2	0	0	0		0		#NULL!	1		0	0	2	2	0	0	2	0	0	0	0	1	1	3	0	1	#NULL!	#NULL!	0	3	#NULL!	0	#NULL!	1	0	1	1	1	0	1
604	0	4	40	5	0	3.8	#NULL!	1	0	5	0	0	0		0		31	1		0	#NULL!	1	2	0	0	2	0	0	0	0	1	1	3	0	1	#NULL!	#NULL!	0	3	0	0	#NULL!	5	0	2	1	1	0	1
605	1	1	28	5	1	0.9	#NULL!	1	0	1	0	0	0		0		20	#NULL!		0	0	1	0	0	0	3	0	0	0	0	0	0	2	0	2	#NULL!	#NULL!	0	0	0	0	#NULL!	3	0	1	1	1	0	1
606	1	2	#NULL!	5	1	3.896	#NULL!	1	2	3	3	#NULL!	0		0		33	2		0	0	3	2	0	0	2	0	0	0	0	1	1	5	0	1	#NULL!	#NULL!	0	3	0	0	#NULL!	3	0	3	1	1	0	1
607	1	0	32	4	0	2.146	2	1	0	2	1	0	0		0		30	1		#NULL!	0	2	#NULL!	#NULL!	#NULL!	#NULL!	#NULL!	#NULL!	#NULL!	#NULL!	#NULL!	#NULL!	6	0	1	#NULL!	#NULL!	0	2	0	0	#NULL!	5	0	2	1	1	0	1
608	0	3	#NULL!	4	0	3.4	#NULL!	1	2	2	0	0	0		0		23	1		0	0	1	#NULL!	#NULL!	#NULL!	#NULL!	#NULL!	#NULL!	#NULL!	0	#NULL!	#NULL!	3	0	1	#NULL!	0	0	3	1	0	#NULL!	3	0	1	1	1	0	1
609	1	6	99	4	0	#NULL!	#NULL!	1	#NULL!	2	0	0	0		0		#NULL!	1		0	0	#NULL!	#NULL!	#NULL!	#NULL!	#NULL!	#NULL!	#NULL!	#NULL!	#NULL!	#NULL!	#NULL!	6	0	1	#NULL!	0	0	#NULL!	#NULL!	0	#NULL!	4	1	3	1	1	0	1
610	1	19	99	4	0	3.5	1	1	0	4	0	0	0		0		28	1		0	0	1	#NULL!	#NULL!	#NULL!	#NULL!	#NULL!	#NULL!	#NULL!	#NULL!	1	#NULL!	5	0	1	#NULL!	#NULL!	0	3	#NULL!	0	#NULL!	4	0	3	1	1	0	1
611	0	11	99	4	0	#NULL!	#NULL!	1	2	2	0	0	0		0		#NULL!	2		0	0	#NULL!	#NULL!	#NULL!	#NULL!	#NULL!	#NULL!	#NULL!	#NULL!	#NULL!	#NULL!	#NULL!	4	0	1	#NULL!	#NULL!	0	#NULL!	0	0	#NULL!	5	0	3	1	1	0	1
612	1	9	99	4	0	2.7	1	1	0	2	0	0	0		0		29	1		0	0	1	2	#NULL!	#NULL!	#NULL!	0	0	0	0	#NULL!	#NULL!	3	0	1	#NULL!	#NULL!	0	3	0	0	#NULL!	1	0	2	1	1	0	1
613	1	23	99	4	0	#NULL!	#NULL!	1	2	2	0	0	0		0		#NULL!	1		0	1	#NULL!	#NULL!	#NULL!	#NULL!	#NULL!	#NULL!	#NULL!	#NULL!	#NULL!	1	#NULL!	4	0	1	#NULL!	#NULL!	0	#NULL!	0	0	#NULL!	3	0	2	1	1	0	1
614	0	0	99	4	1	3.2	#NULL!	2	0	0	0	0	0		0		#NULL!	#NULL!		1	0	#NULL!	#NULL!	#NULL!	#NULL!	#NULL!	#NULL!	#NULL!	#NULL!	#NULL!	#NULL!	#NULL!	5	0	1	#NULL!	0	0	3	1	0	#NULL!	1	0	2	1	1	0	1
615	1	0	99	4	1	3.233	#NULL!	1	0	3	3	0	0		0		26	2		0	0	#NULL!	#NULL!	#NULL!	#NULL!	#NULL!	0	0	0	0	1	#NULL!	3	0	1	#NULL!	#NULL!	0	3	1	0	#NULL!	1	0	2	1	1	0	1
616	0	8	99	4	#NULL!	#NULL!	1	1	2	2	0	0	0		0		28	2		0	0	1	#NULL!	#NULL!	#NULL!	#NULL!	#NULL!	#NULL!	#NULL!	#NULL!	1	#NULL!	3	0	1	#NULL!	#NULL!	0	#NULL!	0	0	#NULL!	3	0	2	1	1	0	1
617	0	0	0	4	1	1.896	#NULL!	1	2	3	1	0	0		0		#NULL!	1		0	0	#NULL!	#NULL!	#NULL!	#NULL!	#NULL!	#NULL!	#NULL!	#NULL!	#NULL!	#NULL!	#NULL!	6	0	1	#NULL!	0	0	2	0	0	1	4	0	1	1	2	1	1
618	0	0	0	4	1	2.85	#NULL!	1	2	16	0	0	0		0		#NULL!	1		0	0	#NULL!	#NULL!	#NULL!	#NULL!	#NULL!	#NULL!	#NULL!	#NULL!	#NULL!	#NULL!	#NULL!	3	0	1	#NULL!	#NULL!	0	3	#NULL!	0	2	4	#NULL!	2	1	#NULL!	#NULL!	1
619	1	4	99	4	0	#NULL!	1	1	2	2	0	0	0		0		30	1		0	0	1	#NULL!	#NULL!	#NULL!	#NULL!	0	0	0	0	1	#NULL!	6	0	1	#NULL!	#NULL!	0	#NULL!	0	0	#NULL!	4	0	2	1	#NULL!	#NULL!	1
620	1	2	99	4	0	3.518	#NULL!	1	0	2	0	0	0		0		#NULL!	1		0	0	#NULL!	#NULL!	#NULL!	#NULL!	#NULL!	#NULL!	#NULL!	#NULL!	#NULL!	#NULL!	#NULL!	9	0	1	#NULL!	#NULL!	0	3	0	0	1	#NULL!	0	2	1	1	0	1
621	0	1	#NULL!	4	1	#NULL!	1	1	0	7	#NULL!	1	1	CCHD	0	sepsis	32	1		0	0	#NULL!	2	0	0	#NULL!	0	0	0	1	1	#NULL!	5	0	1	#NULL!	#NULL!	1	#NULL!	#NULL!	1	4	4	0	3	1	1	0	1
622	1	8	#NULL!	4	1	#NULL!	#NULL!	1	#NULL!	7	0	1	1	PUV	0	sepsis	22	2		1	0	4	#NULL!	#NULL!	#NULL!	#NULL!	#NULL!	#NULL!	#NULL!	0	1	#NULL!	7	0	1	#NULL!	#NULL!	1	#NULL!	0	1	4	#NULL!	2	5	#NULL!	#NULL!	#NULL!	1
623	1	0	99	4	0	3.49	1	#NULL!	2	3	1	0	0		0		25	1		1	0	1	#NULL!	#NULL!	#NULL!	#NULL!	#NULL!	#NULL!	#NULL!	#NULL!	1	#NULL!	6	0	1	#NULL!	#NULL!	0	3	#NULL!	1	#NULL!	#NULL!	0	#NULL!	#NULL!	#NULL!	#NULL!	1
624	1	7	99	4	1	#NULL!	#NULL!	1	2	2	0	0	0		0		28	2		0	0	2	#NULL!	#NULL!	#NULL!	#NULL!	#NULL!	0	#NULL!	0	1	#NULL!	3	0	1	#NULL!	#NULL!	0	#NULL!	1	0	1	1	0	1	0	#NULL!	#NULL!	0
625	0	0	99	4	0	2.95	3	1	2	3	2	0	0		0		37	1		0	0	3	2	#NULL!	#NULL!	#NULL!	#NULL!	#NULL!	#NULL!	#NULL!	1	#NULL!	2	0	1	#NULL!	0	0	3	#NULL!	0	3	4	0	2	1	0	0	1
626	1	2	#NULL!	4	1	2.9	1	1	0	3	3	#NULL!	0		0		26	1		0	#NULL!	1	0	#NULL!	#NULL!	#NULL!	#NULL!	#NULL!	#NULL!	#NULL!	1	#NULL!	5	0	1	#NULL!	#NULL!	0	3	#NULL!	0	#NULL!	3	0	#NULL!	1	1	0	1
627	0	3	32	4	1	1.69	#NULL!	2	0	1	0	1	0		0		#NULL!	1		0	#NULL!	1	#NULL!	#NULL!	#NULL!	#NULL!	#NULL!	#NULL!	#NULL!	#NULL!	#NULL!	#NULL!	10	0	1	#NULL!	#NULL!	0	2	1	1	1	#NULL!	0	1	1	#NULL!	#NULL!	1
628	0	1	36	4	0	1.426	#NULL!	#NULL!	2	1	1	0	0		0		31	1		0	0	1	#NULL!	#NULL!	#NULL!	#NULL!	#NULL!	#NULL!	#NULL!	#NULL!	1	#NULL!	3	0	1	#NULL!	0	0	1	0	1	#NULL!	#NULL!	#NULL!	#NULL!	#NULL!	#NULL!	#NULL!	1
629	1	0	99	4	0	3.2	2	1	0	3	3	#NULL!	0		0		#NULL!	1		#NULL!	0	2	2	0	0	#NULL!	#NULL!	0	#NULL!	0	1	#NULL!	5	0	1	#NULL!	0	0	3	#NULL!	0	2	1	#NULL!	2	1	1	0	1
630	1	28	99	4	1	#NULL!	#NULL!	1	0	0	#NULL!	#NULL!	0		0		#NULL!	1		0	0	2	#NULL!	#NULL!	#NULL!	#NULL!	#NULL!	#NULL!	#NULL!	#NULL!	#NULL!	#NULL!	4	0	1	#NULL!	#NULL!	0	#NULL!	#NULL!	1	#NULL!	#NULL!	0	#NULL!	#NULL!	#NULL!	#NULL!	0
631	1	7	99	4	1	#NULL!	#NULL!	1	2	2	3	1	0		0		#NULL!	2		#NULL!	0	#NULL!	#NULL!	#NULL!	#NULL!	#NULL!	#NULL!	#NULL!	#NULL!	#NULL!	#NULL!	#NULL!	10	0	1	#NULL!	#NULL!	0	#NULL!	#NULL!	0	2	1	#NULL!	2	#NULL!	#NULL!	#NULL!	1
632	1	0	34	4	0	1.57	1	2	2	1	0	0	0		0		30	2		1	0	1	#NULL!	#NULL!	#NULL!	#NULL!	#NULL!	#NULL!	#NULL!	#NULL!	#NULL!	#NULL!	7	0	1	#NULL!	#NULL!	0	2	0	0	1	1	0	1	1	1	0	1
633	0	0	34	4	0	1.48	1	2	2	1	0	0	0		0		30	2		1	0	1	#NULL!	#NULL!	#NULL!	#NULL!	#NULL!	#NULL!	#NULL!	#NULL!	#NULL!	#NULL!	7	0	1	#NULL!	#NULL!	0	1	1	1	#NULL!	1	0	1	#NULL!	#NULL!	#NULL!	1
634	1	0	99	4	1	4.8	#NULL!	1	0	19	0	0	0		0		27	2		0	3	1	#NULL!	#NULL!	#NULL!	#NULL!	#NULL!	#NULL!	#NULL!	#NULL!	#NULL!	#NULL!	2	0	1	#NULL!	#NULL!	0	4	#NULL!	1	4	3	0	4	1	1	0	1
635	1	0	99	4	1	3.3	1	1	0	3	3	0	0		0		28	2		0	0	1	#NULL!	#NULL!	#NULL!	#NULL!	#NULL!	#NULL!	#NULL!	#NULL!	#NULL!	#NULL!	6	0	1	#NULL!	#NULL!	0	3	#NULL!	0	1	1	0	2	1	1	0	1
636	1	0	99	4	0	2.56	#NULL!	1	0	3	2	0	0		0		27	1		0	0	#NULL!	#NULL!	#NULL!	#NULL!	#NULL!	0	1	0	0	#NULL!	#NULL!	7	0	1	#NULL!	0	0	3	0	1	1	3	0	#NULL!	1	1	0	1
637	1	10	#NULL!	4	1	#NULL!	#NULL!	1	0	2	0	1	0		0		#NULL!	1		0	0	2	#NULL!	#NULL!	#NULL!	#NULL!	#NULL!	#NULL!	#NULL!	#NULL!	#NULL!	#NULL!	20	0	1	#NULL!	#NULL!	0	#NULL!	0	1	1	3	0	1	1	1	0	1
638	1	3	#NULL!	4	0	3.6	3	1	0	2	0	0	0		0		35	1		0	0	3	2	0	0	2	0	0	0	0	1	1	2	0	1	#NULL!	0	0	3	1	0	2	1	0	2	#NULL!	#NULL!	#NULL!	1
639	0	0	30	4	1	1.25	1	1	0	1	0	0	0		0		29	2		0	0	1	2	0	0	2	0	0	0	0	1	1	20	0	1	#NULL!	#NULL!	0	1	0	0	1	3	0	1	1	1	0	1
640	1	1	36	5	1	2.744	5	1	2	7	2	0	1	TEF, microphthalmia, VSD, CHARGE, wolff harrison	0		39	1		1	0	5	3	0	0	2	0	#NULL!	1	0	1	1	3	1	4	3	1	1	3	#NULL!	0	#NULL!	2	0	#NULL!	#NULL!	#NULL!	#NULL!	1
641	0	1	#NULL!	5	1	1.7	2	2	0	3	3	0	0		0		29	2		0	0	1	#NULL!	#NULL!	#NULL!	#NULL!	#NULL!	#NULL!	#NULL!	#NULL!	#NULL!	#NULL!	1	0	2	#NULL!	#NULL!	0	2	0	0	3	5	0	3	1	1	0	1
642	0	0	#NULL!	5	1	2.85	3	1	2	3	1	0	0		0		#NULL!	#NULL!		#NULL!	2	5	0	0	0	3	#NULL!	#NULL!	#NULL!	0	1	0	4	0	1	#NULL!	#NULL!	0	3	0	0	#NULL!	#NULL!	#NULL!	#NULL!	1	1	0	1
643	0	0	99	5	1	2.6	1	1	0	3	3	0	0		0		31	#NULL!		#NULL!	#NULL!	1	2	0	0	2	0	0	0	0	#NULL!	1	2	1	4	2	1	0	3	1	0	4	4	0	4	1	#NULL!	#NULL!	0
644	1	0	39	5	1	3.78	1	1	0	3	1	0	0		0		#NULL!	1		0	0	1	2	0	0	2	0	0	0	0	1	1	3	0	1	#NULL!	#NULL!	0	3	#NULL!	0	4	5	0	4	1	1	0	1
645	1	6	#NULL!	5	1	#NULL!	1	1	0	2	0	1	0		0		#NULL!	#NULL!		#NULL!	0	1	4	0	0	#NULL!	0	0	0	0	1	#NULL!	3	0	1	#NULL!	#NULL!	0	#NULL!	0	0	1	1	0	1	#NULL!	#NULL!	#NULL!	0
646	1	0	24	5	1	0.982	1	1	0	1	0	0	0		0		39	2		1	0	1	2	0	0	2	0	0	0	0	1	1	1	1	4	1	1	0	0	0	0	#NULL!	#NULL!	#NULL!	#NULL!	1	1	0	1
647	0	4	99	5	0	#NULL!	1	1	0	7	0	0	1	g6pd def and umbilical hernia	0		#NULL!	1		0	0	1	4	0	0	#NULL!	0	0	0	0	1	1	4	0	1	#NULL!	0	0	#NULL!	#NULL!	0	2	2	0	1	1	0	0	1
648	1	0	#NULL!	5	1	3.1	2	#NULL!	0	3	3	#NULL!	0		#NULL!		27	1		0	0	2	4	0	0	#NULL!	0	0	0	0	1	1	7	0	1	#NULL!	#NULL!	0	3	0	0	1	3	#NULL!	1	1	#NULL!	#NULL!	1
649	1	13	#NULL!	5	1	#NULL!	1	2	0	4	0	0	0		0		16	2		0	0	1	0	0	0	#NULL!	#NULL!	0	#NULL!	0	0	#NULL!	6	0	1	#NULL!	#NULL!	0	#NULL!	0	0	1	3	#NULL!	1	1	1	0	1
650	0	3	99	5	0	3	1	1	0	4	0	0	0		0		27	2		1	0	1	#NULL!	#NULL!	#NULL!	#NULL!	#NULL!	#NULL!	#NULL!	0	1	#NULL!	2	0	1	#NULL!	#NULL!	0	3	0	0	#NULL!	3	0	2	1	1	0	1
651	0	0	99	5	1	3.72	4	1	0	7	0	0	1	DSD, CAH	0		28	1		1	0	3	3	0	0	2	0	0	0	0	1	1	4	0	1	#NULL!	0	1	3	1	0	3	#NULL!	0	3	1	1	0	1
652	1	3	#NULL!	5	1	2.7	1	1	2	2	0	0	0		0		29	1		0	0	1	4	0	0	#NULL!	0	0	0	0	1	1	3	0	1	#NULL!	0	0	3	1	0	#NULL!	3	0	2	1	1	0	1
653	0	3	#NULL!	5	1	1.2	#NULL!	2	0	1	0	1	0		0		#NULL!	2		1	0	#NULL!	0	0	0	3	0	0	0	0	#NULL!	1	10	0	1	#NULL!	0	0	1	0	0	#NULL!	3	0	2	1	1	0	1
654	1	1	#NULL!	5	1	3.09	2	1	0	3	3	1	0		0		23	1		0	0	2	0	0	0	#NULL!	#NULL!	0	0	0	1	0	5	0	1	#NULL!	#NULL!	0	3	#NULL!	0	#NULL!	3	0	2	0	2	1	1
655	0	0	28	5	#NULL!	1.356	#NULL!	1	0	1	0	0	0		0		#NULL!	#NULL!		#NULL!	#NULL!	#NULL!	#NULL!	#NULL!	#NULL!	#NULL!	#NULL!	#NULL!	#NULL!	#NULL!	#NULL!	#NULL!	17	0	1	#NULL!	#NULL!	0	1	0	0	2	5	0	2	1	1	0	1
656	0	0	42	5	0	3.876	4	1	2	3	3	0	0		0		30	1		0	0	4	2	#NULL!	#NULL!	#NULL!	0	0	0	0	1	1	15	0	1	#NULL!	0	0	3	0	0	#NULL!	5	0	5	1	1	0	1
657	0	4	#NULL!	5	0	#NULL!	#NULL!	#NULL!	0	22	0	0	0	g6pd def	0		#NULL!	#NULL!		#NULL!	#NULL!	#NULL!	4	#NULL!	#NULL!	#NULL!	#NULL!	#NULL!	#NULL!	#NULL!	#NULL!	#NULL!	4	0	1	#NULL!	#NULL!	0	#NULL!	0	1	1	2	0	1	1	#NULL!	#NULL!	1
658	0	5	#NULL!	5	1	#NULL!	4	1	0	2	0	0	0		0		#NULL!	2		1	0	4	4	0	0	2	0	0	0	0	1	#NULL!	6	0	1	#NULL!	#NULL!	0	#NULL!	#NULL!	0	#NULL!	3	0	2	1	1	0	1
659	1	8	99	5	0	#NULL!	#NULL!	1	2	2	0	0	0		0		32	1		0	#NULL!	2	4	0	0	#NULL!	0	0	0	0	1	1	2	0	1	#NULL!	0	0	#NULL!	#NULL!	0	#NULL!	1	0	2	1	1	0	1
660	0	5	38	5	1	3.2	#NULL!	1	0	4	0	#NULL!	0		0		32	1		0	0	2	2	0	0	2	0	0	0	0	1	1	13	0	1	#NULL!	#NULL!	0	3	#NULL!	0	#NULL!	1	0	1	1	1	0	1
661	1	2	#NULL!	5	1	2.9	#NULL!	1	0	7	0	0	1	ARM	0		23	#NULL!		0	#NULL!	2	2	0	0	2	0	0	#NULL!	#NULL!	1	1	3	0	1	#NULL!	#NULL!	1	3	#NULL!	0	#NULL!	#NULL!	0	#NULL!	#NULL!	#NULL!	#NULL!	1
662	1	3	38	5	1	2.3	#NULL!	1	0	3	3	0	0		0		30	1		0	0	2	2	0	0	2	0	0	0	0	1	1	1	1	4	4	1	0	2	#NULL!	0	#NULL!	6	0	1	1	1	0	1
663	1	3	39	5	1	3	#NULL!	1	0	4	0	0	0		0		25	1		0	0	#NULL!	2	0	0	2	0	0	0	0	1	1	1	1	4	4	1	0	3	#NULL!	0	#NULL!	2	0	1	1	1	0	1
664	0	2	99	5	1	2.54	1	1	0	7	0	0	1	bilateral cleft lip and palate	0		19	1		1	3	1	2	0	0	#NULL!	0	0	0	0	1	0	5	0	1	#NULL!	#NULL!	0	3	#NULL!	0	2	#NULL!	0	2	1	1	0	1
665	1	3	99	5	1	1.588	1	#NULL!	0	2	1	0	0		0		#NULL!	1		0	0	1	4	0	0	1	0	0	0	0	1	1	2	0	1	#NULL!	#NULL!	0	2	0	0	#NULL!	4	0	2	1	1	0	1
666	0	1	99	5	0	3.21	1	1	2	2	0	0	0		0		20	1		0	0	1	0	#NULL!	#NULL!	3	#NULL!	#NULL!	#NULL!	0	1	#NULL!	2	0	1	#NULL!	#NULL!	0	3	#NULL!	0	#NULL!	4	0	2	1	1	0	1
667	0	4	99	5	1	2.5	2	1	0	3	2	1	0		0		25	1		1	0	2	#NULL!	#NULL!	#NULL!	#NULL!	#NULL!	#NULL!	#NULL!	#NULL!	1	#NULL!	7	0	1	#NULL!	0	0	2	#NULL!	0	#NULL!	5	0	3	0	2	1	1
668	1	2	#NULL!	5	1	2.3	2	2	0	4	0	1	0		0		#NULL!	#NULL!	trading	0	0	2	0	#NULL!	#NULL!	3	0	0	0	0	1	0	1	1	4	4	1	0	2	#NULL!	0	#NULL!	3	0	2	1	1	0	1
669	0	2	34	5	0	1.95	#NULL!	1	0	22	0	0	0	g6pd def	0	nnj	#NULL!	1		0	0	#NULL!	3	#NULL!	#NULL!	#NULL!	#NULL!	#NULL!	#NULL!	0	1	#NULL!	3	0	1	#NULL!	#NULL!	0	2	0	0	2	4	0	2	1	1	0	1
670	0	3	99	5	0	#NULL!	2	1	2	2	0	0	0		0		34	2		0	0	2	3	#NULL!	#NULL!	#NULL!	#NULL!	#NULL!	#NULL!	0	1	1	2	0	1	#NULL!	#NULL!	0	#NULL!	#NULL!	0	#NULL!	#NULL!	0	2	0	2	1	1
671	0	0	#NULL!	5	0	3.2	2	1	0	2	0	0	0		0		30	1		0	0	2	4	0	0	1	0	0	0	0	1	1	3	0	2	#NULL!	#NULL!	0	3	#NULL!	0	#NULL!	5	0	1	1	1	0	0
672	0	0	99	5	1	2.34	1	1	2	3	3	0	0		0		35	2		0	0	1	4	#NULL!	#NULL!	#NULL!	#NULL!	#NULL!	#NULL!	0	1	1	6	0	1	#NULL!	#NULL!	0	2	1	0	#NULL!	4	0	#NULL!	1	1	0	1
673	1	1	99	5	0	2.8	1	1	2	2	0	0	0		0		27	1		0	0	1	4	#NULL!	#NULL!	#NULL!	#NULL!	#NULL!	#NULL!	#NULL!	1	1	1	0	1	#NULL!	0	0	3	1	0	#NULL!	5	0	3	1	1	0	1
674	1	3	99	5	0	2.6	#NULL!	1	0	2	#NULL!	#NULL!	0		0		#NULL!	1		1	0	1	4	0	0	1	0	0	0	0	1	1	4	0	2	#NULL!	#NULL!	0	3	#NULL!	0	#NULL!	4	0	2	1	1	0	1
675	0	0	99	5	0	2.87	3	1	2	3	3	0	0		0		35	1		0	0	3	4	#NULL!	#NULL!	#NULL!	#NULL!	#NULL!	#NULL!	0	1	1	5	0	1	#NULL!	#NULL!	0	3	1	0	#NULL!	3	0	1	1	1	0	1
676	1	0	99	5	1	4.63	3	1	0	3	2	1	0		0		#NULL!	1		1	0	3	#NULL!	#NULL!	#NULL!	#NULL!	#NULL!	#NULL!	#NULL!	#NULL!	1	#NULL!	5	0	1	#NULL!	#NULL!	0	4	0	0	#NULL!	3	0	2	1	1	0	1
677	1	5	#NULL!	5	1	#NULL!	3	1	0	2	0	0	0		0		#NULL!	1		0	0	3	4	0	0	#NULL!	0	0	0	0	1	1	3	0	1	#NULL!	#NULL!	0	#NULL!	#NULL!	0	#NULL!	4	0	2	1	1	0	1
678	1	3	99	5	1	1.97	1	1	0	7	0	0	1	subcutaneous nodules	0	sepsis	27	1		0	0	1	2	#NULL!	#NULL!	#NULL!	1	#NULL!	#NULL!	1	1	#NULL!	10	0	1	#NULL!	#NULL!	0	2	#NULL!	0	1	5	0	2	#NULL!	#NULL!	#NULL!	1
679	0	2	99	5	0	4	2	1	0	2	0	0	0		0		#NULL!	2		0	0	2	#NULL!	#NULL!	#NULL!	#NULL!	#NULL!	#NULL!	#NULL!	#NULL!	1	#NULL!	2	0	1	#NULL!	#NULL!	0	3	#NULL!	1	#NULL!	#NULL!	0	3	1	1	0	1
680	1	0	99	5	1	2.3	2	1	2	3	3	#NULL!	0		0	sepsis	28	1		0	0	2	2	#NULL!	#NULL!	#NULL!	#NULL!	#NULL!	#NULL!	1	1	#NULL!	15	0	1	#NULL!	#NULL!	0	2	0	0	#NULL!	3	0	2	0	2	1	1
681	0	3	#NULL!	5	0	2.6	3	1	0	2	0	1	0		0		30	1		#NULL!	0	3	4	0	0	1	0	0	0	0	1	1	2	0	1	#NULL!	#NULL!	0	3	#NULL!	0	#NULL!	#NULL!	0	#NULL!	1	1	0	1
682	0	0	99	5	0	2.99	#NULL!	1	0	10	0	0	0		0		#NULL!	1		0	1	#NULL!	#NULL!	#NULL!	#NULL!	#NULL!	#NULL!	#NULL!	#NULL!	#NULL!	1	#NULL!	2	0	1	#NULL!	#NULL!	0	3	0	0	#NULL!	#NULL!	0	2	1	1	0	1
683	0	2	#NULL!	5	#NULL!	1.678	#NULL!	1	0	19	0	0	0		0		#NULL!	1	tailor	0	0	1	4	0	0	#NULL!	0	0	0	0	0	1	5	0	1	#NULL!	#NULL!	0	2	0	0	#NULL!	4	#NULL!	1	1	1	0	1
684	1	1	99	5	0	2.48	1	1	0	2	0	0	0		0		23	1		0	0	1	4	#NULL!	#NULL!	#NULL!	#NULL!	#NULL!	#NULL!	#NULL!	1	1	3	0	1	#NULL!	#NULL!	0	2	1	0	#NULL!	2	0	1	0	2	1	0
685	0	0	28	5	1	1.14	1	1	0	1	0	0	0		0		23	1		0	0	1	4	#NULL!	#NULL!	#NULL!	#NULL!	#NULL!	#NULL!	#NULL!	1	1	2	0	2	#NULL!	#NULL!	0	1	#NULL!	0	#NULL!	4	0	3	1	1	0	1
686	0	17	99	5	1	#NULL!	#NULL!	1	0	4	0	0	0		0		#NULL!	1		1	0	#NULL!	#NULL!	#NULL!	#NULL!	#NULL!	#NULL!	#NULL!	0	0	#NULL!	#NULL!	11	0	1	#NULL!	#NULL!	0	#NULL!	1	0	2	3	0	2	#NULL!	#NULL!	#NULL!	1
687	1	5	99	5	1	#NULL!	1	1	0	22	0	#NULL!	0	g6pd def	0		34	2		0	0	1	4	#NULL!	#NULL!	#NULL!	#NULL!	#NULL!	#NULL!	#NULL!	1	1	6	0	1	#NULL!	#NULL!	0	#NULL!	1	0	1	1	0	1	1	1	0	1
688	0	0	37	5	0	2.014	#NULL!	#NULL!	1	3	1	0	0		0		31	1		0	0	4	#NULL!	#NULL!	#NULL!	#NULL!	0	0	0	0	1	1	1	0	1	#NULL!	#NULL!	0	2	#NULL!	0	#NULL!	1	0	1	#NULL!	#NULL!	#NULL!	1
689	1	3	99	5	1	3	1	1	2	2	0	0	0		0	sepsis	20	1		0	0	1	#NULL!	#NULL!	#NULL!	#NULL!	#NULL!	#NULL!	#NULL!	#NULL!	1	#NULL!	3	0	2	#NULL!	#NULL!	0	3	0	0	#NULL!	#NULL!	0	#NULL!	#NULL!	#NULL!	#NULL!	1
690	1	2	99	5	0	3.15	#NULL!	1	0	22	0	0	0	g6pd def	0		#NULL!	1		0	0	#NULL!	#NULL!	#NULL!	#NULL!	#NULL!	#NULL!	#NULL!	#NULL!	#NULL!	1	#NULL!	3	0	1	#NULL!	#NULL!	0	3	0	0	4	6	0	5	1	1	0	1
691	0	4	99	5	0	3.2	1	1	2	2	0	0	0		0		30	2		0	0	1	4	#NULL!	#NULL!	#NULL!	#NULL!	0	#NULL!	0	#NULL!	#NULL!	4	0	1	#NULL!	#NULL!	0	3	0	1	1	3	0	1	#NULL!	#NULL!	#NULL!	1
692	1	3	99	5	1	2.7	1	1	0	3	2	0	0		0		36	1		0	0	1	#NULL!	#NULL!	#NULL!	#NULL!	0	0	0	0	#NULL!	#NULL!	7	0	#NULL!	#NULL!	#NULL!	0	3	0	1	#NULL!	#NULL!	0	#NULL!	#NULL!	#NULL!	#NULL!	1
693	1	0	#NULL!	5	1	3.26	#NULL!	1	0	3	3	0	0		0		#NULL!	2		0	0	#NULL!	#NULL!	#NULL!	#NULL!	#NULL!	#NULL!	#NULL!	#NULL!	0	#NULL!	#NULL!	1	1	4	0	1	0	3	0	1	1	3	0	1	1	#NULL!	#NULL!	1
694	1	5	99	5	0	#NULL!	#NULL!	1	2	22	0	0	0	g6pd def	0		#NULL!	1		0	0	3	4	#NULL!	#NULL!	1	0	0	#NULL!	#NULL!	1	1	3	0	2	#NULL!	#NULL!	0	#NULL!	#NULL!	0	1	1	0	1	0	#NULL!	#NULL!	1
695	0	0	28	5	0	1.17	3	1	2	1	0	0	0		0		33	1		0	0	3	#NULL!	#NULL!	#NULL!	#NULL!	#NULL!	#NULL!	#NULL!	#NULL!	1	#NULL!	41	0	1	#NULL!	#NULL!	0	1	0	1	#NULL!	#NULL!	1	#NULL!	#NULL!	#NULL!	#NULL!	1
696	1	1	99	5	1	2.88	5	1	0	4	0	0	0		0		35	1		1	0	5	4	#NULL!	#NULL!	#NULL!	#NULL!	#NULL!	#NULL!	#NULL!	1	1	9	0	1	#NULL!	#NULL!	0	3	0	0	#NULL!	#NULL!	0	#NULL!	#NULL!	#NULL!	#NULL!	1
697	1	1	#NULL!	5	1	#NULL!	1	1	0	2	0	0	0		0		23	1		0	0	1	4	#NULL!	#NULL!	#NULL!	#NULL!	#NULL!	#NULL!	0	#NULL!	#NULL!	1	0	1	#NULL!	#NULL!	0	#NULL!	0	0	#NULL!	3	0	#NULL!	#NULL!	#NULL!	#NULL!	1
698	0	5	99	5	0	2.9	2	1	0	2	0	0	0		0		#NULL!	1		0	0	2	4	#NULL!	#NULL!	#NULL!	#NULL!	#NULL!	#NULL!	0	#NULL!	#NULL!	3	0	1	#NULL!	0	0	3	0	1	1	3	0	1	#NULL!	#NULL!	#NULL!	1
699	1	4	99	5	1	2.54	1	1	0	2	0	0	0		0		#NULL!	2		0	0	1	2	#NULL!	#NULL!	#NULL!	#NULL!	#NULL!	#NULL!	1	1	1	5	0	1	#NULL!	#NULL!	0	3	1	0	#NULL!	#NULL!	0	#NULL!	#NULL!	#NULL!	#NULL!	1
700	1	4	99	5	1	2.4	#NULL!	1	2	22	2	0	0	g6pd def	0		#NULL!	1		0	0	1	#NULL!	#NULL!	#NULL!	#NULL!	0	0	0	0	1	#NULL!	9	0	1	#NULL!	#NULL!	0	2	#NULL!	1	3	5	0	3	1	#NULL!	#NULL!	1
701	1	0	27	5	0	0.92	2	1	0	1	0	#NULL!	0		0		27	1		1	0	2	4	#NULL!	#NULL!	#NULL!	#NULL!	#NULL!	#NULL!	0	1	#NULL!	3	1	4	3	1	0	0	1	0	#NULL!	#NULL!	0	#NULL!	#NULL!	#NULL!	#NULL!	1
702	0	1	99	5	0	3.9	1	1	0	2	0	0	0		0		25	1		1	0	1	4	#NULL!	#NULL!	#NULL!	#NULL!	#NULL!	0	0	#NULL!	#NULL!	2	0	1	#NULL!	#NULL!	0	3	0	0	1	3	0	1	#NULL!	#NULL!	#NULL!	1
703	0	5	99	5	0	2.54	3	1	0	2	0	0	0		0		#NULL!	1		0	0	3	#NULL!	#NULL!	#NULL!	#NULL!	#NULL!	#NULL!	#NULL!	#NULL!	1	#NULL!	2	0	1	#NULL!	#NULL!	0	3	0	0	#NULL!	#NULL!	0	#NULL!	#NULL!	#NULL!	#NULL!	1
704	1	5	#NULL!	3	1	3.5	1	1	2	3	3	0	0		0		33	1		0	0	1	4	#NULL!	#NULL!	#NULL!	#NULL!	#NULL!	#NULL!	#NULL!	1	1	1	1	4	6	1	0	3	#NULL!	0	1	4	0	#NULL!	1	#NULL!	#NULL!	1
705	1	7	#NULL!	3	1	#NULL!	2	1	0	2	2	0	0		0		#NULL!	1		0	0	2	4	#NULL!	#NULL!	#NULL!	#NULL!	#NULL!	#NULL!	1	1	1	5	0	1	#NULL!	#NULL!	0	#NULL!	#NULL!	1	#NULL!	1	0	4	#NULL!	#NULL!	#NULL!	1
706	1	0	0	3	0	1.9	#NULL!	1	2	1	0	0	0		0	sepsis and nnj	#NULL!	1		0	0	#NULL!	#NULL!	#NULL!	#NULL!	#NULL!	#NULL!	#NULL!	#NULL!	#NULL!	1	#NULL!	30	0	1	#NULL!	0	0	2	0	0	1	1	0	1	#NULL!	#NULL!	#NULL!	1
707	1	2	#NULL!	3	1	2.8	3	1	0	3	3	0	0		0		#NULL!	1		0	0	4	4	#NULL!	#NULL!	#NULL!	#NULL!	#NULL!	#NULL!	0	1	1	7	0	1	#NULL!	#NULL!	0	3	0	0	#NULL!	3	0	2	#NULL!	#NULL!	#NULL!	1
708	1	24	35	3	1	#NULL!	#NULL!	1	0	20	0	#NULL!	0		0		#NULL!	1		0	0	#NULL!	#NULL!	#NULL!	#NULL!	#NULL!	#NULL!	#NULL!	#NULL!	#NULL!	1	#NULL!	21	0	2	#NULL!	#NULL!	0	#NULL!	0	0	3	5	0	3	1	#NULL!	#NULL!	1
709	0	2	#NULL!	3	1	3.198	#NULL!	1	2	12	0	0	0		0	nnj	#NULL!	1		0	0	#NULL!	4	#NULL!	#NULL!	#NULL!	#NULL!	#NULL!	#NULL!	#NULL!	1	1	2	0	1	#NULL!	#NULL!	0	3	#NULL!	0	1	3	#NULL!	1	0	#NULL!	#NULL!	1
710	1	0	#NULL!	3	0	3.666	#NULL!	1	0	3	2	0	0		0		#NULL!	1		0	0	#NULL!	4	#NULL!	#NULL!	#NULL!	#NULL!	#NULL!	#NULL!	#NULL!	1	1	2	0	1	#NULL!	0	0	3	1	0	#NULL!	#NULL!	#NULL!	1	#NULL!	#NULL!	#NULL!	1
711	1	3	99	3	1	2.47	1	1	0	2	0	0	0		0		#NULL!	1		1	0	1	#NULL!	#NULL!	#NULL!	#NULL!	#NULL!	#NULL!	#NULL!	#NULL!	1	#NULL!	4	1	4	7	1	0	2	1	0	#NULL!	4	0	1	#NULL!	#NULL!	#NULL!	1
712	0	0	99	3	0	2.44	1	1	0	3	2	0	0		0		#NULL!	1		0	0	1	#NULL!	#NULL!	#NULL!	#NULL!	#NULL!	#NULL!	#NULL!	#NULL!	1	#NULL!	2	0	1	#NULL!	#NULL!	0	2	0	0	2	#NULL!	0	2	1	#NULL!	#NULL!	1
713	1	3	99	3	1	3.35	2	1	0	3	3	1	0		0		#NULL!	1		0	0	#NULL!	#NULL!	#NULL!	#NULL!	#NULL!	#NULL!	#NULL!	#NULL!	#NULL!	1	#NULL!	3	0	2	#NULL!	#NULL!	0	3	0	1	#NULL!	#NULL!	0	2	#NULL!	#NULL!	#NULL!	1
714	1	0	99	3	0	2.6	3	1	2	10	0	0	0		0		#NULL!	2		0	0	2	#NULL!	#NULL!	#NULL!	#NULL!	#NULL!	#NULL!	#NULL!	#NULL!	1	#NULL!	3	0	1	#NULL!	#NULL!	0	3	0	0	#NULL!	#NULL!	0	#NULL!	#NULL!	#NULL!	#NULL!	1
715	1	0	31	3	0	1.89	1	1	2	1	0	0	0		0		#NULL!	1		0	0	1	#NULL!	#NULL!	#NULL!	#NULL!	#NULL!	#NULL!	#NULL!	#NULL!	1	#NULL!	8	0	1	#NULL!	0	0	2	1	0	1	3	0	1	#NULL!	#NULL!	#NULL!	1
716	0	0	99	3	1	2.01	1	1	0	4	0	1	0		0		#NULL!	1		0	0	1	#NULL!	#NULL!	#NULL!	#NULL!	#NULL!	#NULL!	#NULL!	#NULL!	1	#NULL!	3	0	1	#NULL!	#NULL!	0	2	1	0	1	3	0	1	#NULL!	#NULL!	#NULL!	1
717	0	2	99	3	1	2.79	3	1	0	3	3	#NULL!	0		0	sepsis	25	1		1	0	2	#NULL!	#NULL!	#NULL!	#NULL!	#NULL!	#NULL!	#NULL!	#NULL!	1	#NULL!	2	1	4	3	1	0	3	0	0	#NULL!	3	2	1	#NULL!	#NULL!	#NULL!	1
718	1	2	99	3	0	4.06	2	1	2	2	0	0	0		0	sepsis	#NULL!	1		0	0	2	4	#NULL!	#NULL!	#NULL!	#NULL!	#NULL!	#NULL!	1	1	#NULL!	4	0	1	#NULL!	0	0	4	0	0	1	3	0	1	#NULL!	#NULL!	#NULL!	1
719	1	4	99	3	1	2.94	1	1	0	2	0	0	0		0	sepsis	26	1		1	0	1	4	#NULL!	#NULL!	#NULL!	#NULL!	#NULL!	#NULL!	#NULL!	1	#NULL!	3	0	1	#NULL!	#NULL!	0	3	0	0	#NULL!	3	0	#NULL!	#NULL!	#NULL!	#NULL!	1
720	1	0	99	3	0	2.78	#NULL!	1	2	19	0	0	0		0		#NULL!	1		0	0	2	#NULL!	#NULL!	#NULL!	#NULL!	#NULL!	#NULL!	#NULL!	#NULL!	1	#NULL!	3	0	1	#NULL!	0	0	3	#NULL!	1	#NULL!	#NULL!	0	2	#NULL!	#NULL!	#NULL!	1
721	1	0	32	3	0	1.99	#NULL!	1	2	1	0	0	0		0		#NULL!	1		0	0	#NULL!	#NULL!	#NULL!	#NULL!	#NULL!	#NULL!	#NULL!	#NULL!	#NULL!	1	#NULL!	30	0	1	#NULL!	#NULL!	0	2	#NULL!	0	3	4	0	3	1	1	0	1
722	0	7	#NULL!	3	1	1.66	3	2	#NULL!	2	0	0	0		0		#NULL!	1		1	0	3	1	#NULL!	#NULL!	1	#NULL!	#NULL!	#NULL!	0	1	#NULL!	6	0	1	#NULL!	#NULL!	0	2	1	0	1	3	0	1	1	1	0	1
723	0	7	#NULL!	3	1	2.05	2	2	#NULL!	2	0	0	0		0		#NULL!	1		1	0	3	1	#NULL!	#NULL!	1	#NULL!	#NULL!	#NULL!	0	1	#NULL!	6	0	1	#NULL!	#NULL!	0	2	1	0	4	5	0	5	1	1	0	0
724	1	0	99	3	1	3.52	1	1	0	4	0	0	0		0		#NULL!	1		0	0	1	4	#NULL!	#NULL!	#NULL!	#NULL!	#NULL!	#NULL!	#NULL!	1	#NULL!	4	0	1	#NULL!	0	0	3	#NULL!	0	2	3	0	1	#NULL!	#NULL!	#NULL!	0
725	1	1	35	3	0	1.99	2	1	0	1	0	0	0		0		#NULL!	1		1	#NULL!	2	4	#NULL!	#NULL!	#NULL!	#NULL!	#NULL!	#NULL!	0	1	1	3	0	1	#NULL!	#NULL!	0	2	#NULL!	0	3	#NULL!	2	5	0	2	1	1
726	1	1	#NULL!	3	1	2	6	1	0	7	0	1	1	omphalocoele, VSD, BISH	0		#NULL!	1		0	0	6	0	#NULL!	#NULL!	#NULL!	#NULL!	#NULL!	#NULL!	0	1	0	33	0	1	#NULL!	0	1	2	#NULL!	0	3	1	0	3	1	1	0	1
727	0	0	33	3	1	1.552	2	2	2	1	0	0	0		0	sepsis	#NULL!	1		0	0	2	#NULL!	#NULL!	#NULL!	#NULL!	#NULL!	#NULL!	#NULL!	#NULL!	1	#NULL!	33	0	1	#NULL!	0	0	2	0	0	1	4	#NULL!	1	1	1	0	0
728	0	0	33	3	1	1.45	1	2	2	1	0	0	0		0	sepsis	#NULL!	1		0	0	2	#NULL!	#NULL!	#NULL!	#NULL!	#NULL!	#NULL!	#NULL!	#NULL!	1	#NULL!	33	0	1	#NULL!	0	0	1	0	0	1	#NULL!	0	1	1	1	0	1
729	0	0	36	3	0	2.56	#NULL!	1	2	1	0	0	0		0		#NULL!	1		0	0	#NULL!	#NULL!	#NULL!	#NULL!	#NULL!	#NULL!	#NULL!	#NULL!	#NULL!	1	#NULL!	6	0	1	#NULL!	#NULL!	0	3	#NULL!	0	1	#NULL!	0	1	1	#NULL!	#NULL!	1
730	0	1	99	3	1	2.98	1	1	0	3	3	1	0		0		#NULL!	1		0	0	#NULL!	0	#NULL!	#NULL!	#NULL!	#NULL!	#NULL!	#NULL!	0	#NULL!	0	2	0	2	#NULL!	#NULL!	0	3	1	0	1	5	0	1	1	1	0	0
731	1	0	30	3	0	1.41	1	3	2	1	0	0	0		0		#NULL!	1		0	0	1	#NULL!	#NULL!	#NULL!	#NULL!	#NULL!	#NULL!	#NULL!	#NULL!	1	#NULL!	35	0	1	#NULL!	#NULL!	0	1	0	0	1	#NULL!	0	1	1	#NULL!	#NULL!	1
732	1	0	30	3	0	1.516	3	3	2	1	0	0	0		0		#NULL!	1		0	0	1	#NULL!	#NULL!	#NULL!	#NULL!	#NULL!	#NULL!	#NULL!	#NULL!	1	#NULL!	35	0	1	#NULL!	#NULL!	0	2	#NULL!	0	2	3	0	2	1	#NULL!	#NULL!	1
733	1	0	30	3	0	1.24	2	3	2	1	0	0	0		0		#NULL!	1		0	0	1	#NULL!	#NULL!	#NULL!	#NULL!	#NULL!	#NULL!	#NULL!	#NULL!	1	#NULL!	35	0	1	#NULL!	#NULL!	0	1	#NULL!	1	1	2	0	1	0	#NULL!	#NULL!	1
734	1	0	34	3	0	2.61	4	1	0	1	0	0	0		0		#NULL!	2		0	0	4	#NULL!	#NULL!	#NULL!	#NULL!	#NULL!	#NULL!	#NULL!	#NULL!	1	#NULL!	4	0	1	#NULL!	0	0	3	0	0	1	3	0	1	#NULL!	#NULL!	#NULL!	1
735	1	8	99	3	0	#NULL!	#NULL!	1	0	2	0	0	0		0		28	1		#NULL!	#NULL!	#NULL!	#NULL!	#NULL!	#NULL!	#NULL!	#NULL!	#NULL!	#NULL!	0	1	#NULL!	4	0	1	#NULL!	0	0	#NULL!	0	0	4	3	0	3	1	1	0	1
736	0	2	99	3	1	1.71	1	1	0	4	0	0	0		0		29	1		1	0	1	4	#NULL!	#NULL!	#NULL!	#NULL!	#NULL!	#NULL!	0	1	#NULL!	6	0	1	#NULL!	#NULL!	0	2	#NULL!	0	1	3	0	1	1	#NULL!	#NULL!	1
737	0	0	0	3	0	2.4	#NULL!	1	2	1	0	0	0		0		#NULL!	1		0	0	#NULL!	#NULL!	#NULL!	#NULL!	#NULL!	#NULL!	#NULL!	#NULL!	#NULL!	1	#NULL!	3	0	1	#NULL!	0	0	2	#NULL!	0	#NULL!	#NULL!	0	#NULL!	0	2	1	1
738	1	0	99	3	1	2.92	1	1	0	3	3	0	0		0		#NULL!	1		1	0	#NULL!	#NULL!	#NULL!	#NULL!	#NULL!	#NULL!	#NULL!	#NULL!	#NULL!	1	#NULL!	9	0	1	#NULL!	#NULL!	0	3	#NULL!	0	2	1	0	2	0	#NULL!	#NULL!	1
739	0	7	99	3	0	#NULL!	#NULL!	1	2	2	0	0	0		0		#NULL!	1		0	0	#NULL!	#NULL!	#NULL!	#NULL!	#NULL!	#NULL!	#NULL!	#NULL!	#NULL!	1	#NULL!	2	0	1	#NULL!	0	0	#NULL!	1	0	#NULL!	#NULL!	#NULL!	#NULL!	#NULL!	#NULL!	#NULL!	1
740	1	0	99	3	1	2.9	1	1	0	3	3	0	0		0		20	1		1	0	1	4	#NULL!	#NULL!	#NULL!	#NULL!	#NULL!	#NULL!	#NULL!	1	#NULL!	9	0	1	#NULL!	0	0	3	0	0	4	3	0	4	1	#NULL!	#NULL!	1
741	0	6	99	3	0	2.9	2	1	0	4	0	0	0		0		33	1		0	0	2	4	#NULL!	#NULL!	#NULL!	#NULL!	#NULL!	#NULL!	0	1	1	3	0	1	#NULL!	0	0	3	#NULL!	0	#NULL!	#NULL!	#NULL!	#NULL!	1	#NULL!	#NULL!	1
742	1	4	99	3	0	#NULL!	#NULL!	1	0	2	0	0	0		0		#NULL!	1		0	0	#NULL!	#NULL!	#NULL!	#NULL!	#NULL!	#NULL!	#NULL!	#NULL!	#NULL!	1	#NULL!	3	0	1	#NULL!	0	0	#NULL!	#NULL!	0	4	#NULL!	0	4	1	1	0	1
743	0	2	#NULL!	3	0	1.91	3	1	2	2	0	0	0		0		#NULL!	2		0	0	3	4	#NULL!	#NULL!	#NULL!	#NULL!	#NULL!	#NULL!	0	1	2	3	0	1	#NULL!	#NULL!	0	2	0	1	#NULL!	4	#NULL!	2	1	#NULL!	#NULL!	1
744	0	0	99	5	1	#NULL!	2	1	0	3	3	0	0		0		31	1		0	#NULL!	2	2	#NULL!	#NULL!	#NULL!	#NULL!	#NULL!	#NULL!	1	1	#NULL!	1	0	3	#NULL!	#NULL!	0	#NULL!	0	0	#NULL!	4	0	2	1	1	0	1
745	0	2	99	5	1	2.9	1	1	0	3	3	0	0		0	sepsis	17	1		1	0	1	3	#NULL!	#NULL!	#NULL!	#NULL!	#NULL!	#NULL!	1	0	1	7	0	2	#NULL!	#NULL!	0	3	#NULL!	0	#NULL!	1	#NULL!	2	1	1	0	1
746	0	0	99	5	0	3.75	2	1	2	0	0	0	0		0		28	1		0	0	2	4	#NULL!	#NULL!	#NULL!	#NULL!	#NULL!	#NULL!	0	#NULL!	1	1	0	1	#NULL!	0	0	3	0	0	#NULL!	3	0	2	1	1	0	0
747	1	0	99	5	0	2.07	1	1	0	22	0	0	0	g6pd def	0		#NULL!	1		0	0	1	4	#NULL!	#NULL!	#NULL!	#NULL!	#NULL!	#NULL!	0	#NULL!	1	1	0	2	#NULL!	#NULL!	0	2	#NULL!	0	1	3	0	1	1	1	0	1
748	1	1	35	5	0	1.64	4	2	0	22	0	#NULL!	0	g6pd def	0		34	2		1	0	4	#NULL!	#NULL!	#NULL!	#NULL!	#NULL!	#NULL!	#NULL!	#NULL!	1	#NULL!	16	0	1	#NULL!	#NULL!	0	2	0	0	2	2	2	2	1	1	0	1
749	1	0	35	5	0	1.79	3	2	0	22	0	#NULL!	0	g6pd def	0		34	2		1	0	4	#NULL!	#NULL!	#NULL!	#NULL!	#NULL!	#NULL!	#NULL!	#NULL!	1	#NULL!	16	0	1	#NULL!	#NULL!	0	2	1	0	1	3	0	1	1	#NULL!	#NULL!	1
750	1	0	30	5	1	1.3	3	2	0	1	#NULL!	0	0		0		30	2		0	0	2	2	#NULL!	#NULL!	2	#NULL!	#NULL!	#NULL!	1	#NULL!	1	18	0	1	#NULL!	#NULL!	0	1	0	0	#NULL!	1	0	#NULL!	1	1	0	0
751	0	3	99	5	0	2.4	3	1	2	2	0	0	0		0		31	1		0	0	3	4	#NULL!	#NULL!	#NULL!	#NULL!	#NULL!	#NULL!	#NULL!	1	2	5	0	1	#NULL!	#NULL!	0	2	0	0	1	2	2	1	1	#NULL!	#NULL!	1
752	1	0	99	5	0	3	3	1	2	3	1	0	0		0		35	1		1	0	3	4	#NULL!	#NULL!	#NULL!	#NULL!	#NULL!	#NULL!	0	#NULL!	1	2	0	1	#NULL!	#NULL!	0	3	0	0	1	#NULL!	0	1	1	0	0	1
753	0	1	99	5	0	2.45	3	1	0	2	0	0	0		0		26	1		1	0	3	4	#NULL!	#NULL!	#NULL!	#NULL!	#NULL!	#NULL!	#NULL!	1	1	3	0	1	#NULL!	#NULL!	0	2	0	0	1	2	0	1	0	2	1	1
754	0	1	99	5	0	2.94	3	1	2	2	0	0	0		0		#NULL!	1		0	0	3	4	#NULL!	#NULL!	#NULL!	#NULL!	#NULL!	#NULL!	0	1	1	3	0	1	#NULL!	#NULL!	0	3	0	0	2	1	0	2	#NULL!	#NULL!	#NULL!	1
755	0	0	24	5	1	0.674	1	1	0	1	0	#NULL!	0		0		20	1		0	0	1	4	#NULL!	#NULL!	#NULL!	#NULL!	#NULL!	#NULL!	0	#NULL!	1	2	0	1	#NULL!	#NULL!	0	0	#NULL!	0	2	#NULL!	0	2	0	2	1	0
756	1	0	99	5	1	3.2	1	1	2	3	3	0	0		0		37	2		0	0	1	4	#NULL!	#NULL!	#NULL!	#NULL!	#NULL!	#NULL!	#NULL!	1	#NULL!	10	0	2	#NULL!	#NULL!	0	3	1	0	#NULL!	#NULL!	0	#NULL!	1	#NULL!	#NULL!	1
757	1	0	99	5	0	2.5	2	1	2	4	0	0	0		0		#NULL!	1		#NULL!	0	2	4	#NULL!	#NULL!	#NULL!	#NULL!	#NULL!	#NULL!	0	1	1	6	0	1	#NULL!	#NULL!	0	2	0	0	2	4	0	2	1	#NULL!	#NULL!	1
758	0	0	32	5	0	1.408	2	2	0	1	0	0	0		0	nnj	29	1		0	0	1	4	#NULL!	#NULL!	#NULL!	#NULL!	#NULL!	#NULL!	#NULL!	#NULL!	1	14	0	1	#NULL!	0	0	1	#NULL!	0	2	3	0	2	1	0	0	0
759	1	0	99	5	0	2.69	3	1	0	10	0	0	0		0	sepsis	29	1		1	0	3	4	#NULL!	#NULL!	#NULL!	#NULL!	#NULL!	#NULL!	#NULL!	1	1	4	0	2	#NULL!	#NULL!	0	3	0	0	1	4	0	1	1	#NULL!	#NULL!	1
760	1	0	32	5	0	1.5	1	2	0	1	0	0	0		0		29	1		0	0	1	4	#NULL!	#NULL!	#NULL!	#NULL!	#NULL!	#NULL!	0	#NULL!	1	14	0	1	#NULL!	#NULL!	0	1	0	0	1	3	0	1	1	#NULL!	#NULL!	1
761	1	1	34	5	0	1.386	4	2	0	1	0	0	0		0	anaemia	25	2		1	0	2	4	#NULL!	#NULL!	#NULL!	#NULL!	#NULL!	#NULL!	1	#NULL!	1	2	0	2	#NULL!	#NULL!	0	1	0	0	#NULL!	#NULL!	0	1	1	0	0	0
762	0	1	34	5	0	1.096	3	2	0	1	1	0	0		0	anaemia	25	2		1	0	2	4	#NULL!	#NULL!	#NULL!	#NULL!	#NULL!	#NULL!	1	#NULL!	1	3	0	2	#NULL!	#NULL!	0	1	0	0	3	4	0	3	1	#NULL!	#NULL!	1
763	0	3	99	5	0	2.4	4	1	0	2	0	0	0		0		37	1		0	0	4	2	#NULL!	#NULL!	2	#NULL!	#NULL!	#NULL!	0	1	1	2	0	1	#NULL!	#NULL!	0	2	0	0	3	#NULL!	0	3	#NULL!	#NULL!	#NULL!	1
764	0	13	99	5	1	3.2	1	1	2	4	0	0	0		0		#NULL!	1		0	0	1	4	#NULL!	#NULL!	#NULL!	#NULL!	#NULL!	#NULL!	#NULL!	1	1	3	0	1	#NULL!	#NULL!	0	3	#NULL!	0	3	#NULL!	0	3	1	#NULL!	#NULL!	1
765	1	0	28	5	1	1.08	2	2	0	1	0	0	0		0		36	1		0	0	2	4	#NULL!	#NULL!	#NULL!	#NULL!	#NULL!	#NULL!	0	1	1	44	0	1	#NULL!	#NULL!	0	1	0	0	1	3	0	1	1	#NULL!	#NULL!	1
766	0	0	22	5	1	0.92	1	2	0	1	0	0	0		0	sepsis	36	2		0	0	2	4	#NULL!	#NULL!	#NULL!	#NULL!	#NULL!	#NULL!	0	1	1	16	0	1	#NULL!	#NULL!	0	0	0	0	2	#NULL!	0	2	#NULL!	#NULL!	#NULL!	1
767	0	0	99	5	0	3.32	#NULL!	1	0	3	2	0	0		0		#NULL!	1		1	0	#NULL!	4	#NULL!	#NULL!	#NULL!	#NULL!	#NULL!	#NULL!	0	1	1	4	0	2	#NULL!	#NULL!	0	3	0	0	2	3	0	2	1	#NULL!	#NULL!	1
768	1	2	#NULL!	5	0	3.34	3	1	0	2	0	0	0		0		32	1		0	0	3	#NULL!	#NULL!	#NULL!	#NULL!	#NULL!	#NULL!	#NULL!	0	#NULL!	1	2	0	1	#NULL!	#NULL!	0	3	#NULL!	0	3	3	0	3	1	0	0	1
769	1	0	32	5	0	1.62	2	1	2	1	0	0	0		0	sepsis	30	1		0	0	2	2	#NULL!	#NULL!	2	#NULL!	#NULL!	#NULL!	0	1	1	8	0	1	#NULL!	#NULL!	0	2	0	0	#NULL!	#NULL!	1	#NULL!	#NULL!	#NULL!	#NULL!	1
770	0	0	99	5	0	3.26	1	1	0	3	2	0	0		0		#NULL!	1		1	0	1	#NULL!	#NULL!	#NULL!	#NULL!	#NULL!	#NULL!	#NULL!	#NULL!	1	#NULL!	3	0	2	#NULL!	#NULL!	0	3	#NULL!	0	#NULL!	#NULL!	0	1	1	#NULL!	#NULL!	1
771	1	0	36	5	#NULL!	1.73	1	1	0	1	0	0	0		0		33	1		0	0	1	#NULL!	#NULL!	#NULL!	#NULL!	#NULL!	#NULL!	#NULL!	#NULL!	#NULL!	1	21	0	1	#NULL!	#NULL!	0	2	0	0	1	1	0	1	1	#NULL!	#NULL!	1
772	0	0	99	5	0	3	1	1	2	3	3	0	0		0	sepsis	30	2		#NULL!	0	1	4	#NULL!	#NULL!	#NULL!	#NULL!	#NULL!	#NULL!	0	1	1	10	0	1	#NULL!	#NULL!	0	3	1	0	1	1	0	1	1	#NULL!	#NULL!	0
773	0	3	99	5	0	3.28	3	1	2	2	0	0	0		0		40	1		0	0	3	4	#NULL!	#NULL!	#NULL!	#NULL!	#NULL!	#NULL!	#NULL!	1	1	2	0	1	#NULL!	#NULL!	0	3	0	1	#NULL!	#NULL!	0	#NULL!	#NULL!	#NULL!	#NULL!	1
774	1	3	99	5	1	3.53	2	1	0	3	3	0	0		0		#NULL!	1		0	0	1	#NULL!	#NULL!	#NULL!	#NULL!	#NULL!	#NULL!	#NULL!	#NULL!	1	#NULL!	7	0	2	#NULL!	#NULL!	0	3	0	0	1	4	0	1	1	#NULL!	#NULL!	1
775	1	0	99	5	1	2.66	3	1	2	3	3	0	0		0	sepsis	#NULL!	1		1	0	2	4	#NULL!	#NULL!	#NULL!	#NULL!	#NULL!	#NULL!	0	1	#NULL!	4	0	2	#NULL!	#NULL!	0	3	0	0	#NULL!	4	0	4	#NULL!	#NULL!	#NULL!	1
776	0	2	99	5	0	2.48	1	1	0	2	0	0	0		0		32	1		0	0	1	4	#NULL!	#NULL!	#NULL!	#NULL!	#NULL!	#NULL!	0	1	1	2	0	1	#NULL!	#NULL!	0	2	0	0	1	2	0	1	#NULL!	#NULL!	#NULL!	0
777	1	6	99	5	1	#NULL!	2	1	0	2	0	0	0		0		#NULL!	1		0	0	2	#NULL!	#NULL!	#NULL!	#NULL!	#NULL!	#NULL!	#NULL!	#NULL!	1	#NULL!	5	0	1	#NULL!	#NULL!	0	#NULL!	0	0	#NULL!	#NULL!	0	#NULL!	#NULL!	#NULL!	#NULL!	1
778	0	0	35	5	0	3.2	2	1	2	1	0	0	0		0	sepsis	41	1		0	0	2	2	#NULL!	#NULL!	2	#NULL!	#NULL!	#NULL!	1	1	1	8	0	1	#NULL!	#NULL!	0	3	0	0	1	3	0	1	1	#NULL!	#NULL!	1
779	1	4	99	5	0	3.01	2	1	0	2	0	0	0		0		29	1		0	0	2	4	#NULL!	#NULL!	#NULL!	#NULL!	#NULL!	#NULL!	0	1	#NULL!	9	0	1	#NULL!	#NULL!	0	3	0	0	1	5	0	1	#NULL!	#NULL!	#NULL!	#NULL!
780	1	0	33	5	0	1.66	1	1	0	1	0	#NULL!	0		0	sepsis	27	1		0	0	1	4	#NULL!	#NULL!	#NULL!	#NULL!	#NULL!	#NULL!	1	1	1	5	0	2	#NULL!	#NULL!	0	2	#NULL!	0	#NULL!	#NULL!	0	#NULL!	#NULL!	#NULL!	#NULL!	0
781	1	0	99	5	0	3.03	1	1	0	3	2	0	0		0		28	1		0	0	1	4	#NULL!	#NULL!	#NULL!	#NULL!	#NULL!	#NULL!	#NULL!	1	1	5	0	1	#NULL!	#NULL!	0	3	0	0	#NULL!	#NULL!	0	3	1	0	0	0
782	1	0	99	5	0	3.9	#NULL!	1	2	3	1	0	0		0		#NULL!	1		0	0	#NULL!	#NULL!	#NULL!	#NULL!	#NULL!	#NULL!	#NULL!	#NULL!	#NULL!	1	#NULL!	4	0	1	#NULL!	#NULL!	0	3	1	0	3	4	0	3	#NULL!	#NULL!	#NULL!	1
783	1	6	99	5	1	2.5	2	1	0	7	0	0	1	hirschsprung's disease	0		#NULL!	1		0	0	2	#NULL!	#NULL!	#NULL!	#NULL!	#NULL!	#NULL!	#NULL!	#NULL!	1	#NULL!	3	0	3	#NULL!	#NULL!	1	2	0	0	1	2	0	1	1	1	0	1
784	0	3	99	5	0	2.68	1	1	2	22	0	0	0	g6pd def	0		29	1		0	0	1	4	#NULL!	#NULL!	#NULL!	#NULL!	#NULL!	#NULL!	0	1	#NULL!	2	0	1	#NULL!	#NULL!	0	3	0	0	3	#NULL!	0	3	1	#NULL!	#NULL!	1
785	0	0	33	5	0	1.52	1	2	0	7	0	0	1	CTEV	0		#NULL!	1		0	0	1	4	#NULL!	#NULL!	#NULL!	#NULL!	#NULL!	#NULL!	0	1	#NULL!	3	0	1	#NULL!	#NULL!	0	2	#NULL!	0	#NULL!	#NULL!	1	#NULL!	#NULL!	#NULL!	#NULL!	1
786	1	0	99	5	0	3.42	1	1	2	3	2	0	0		0	sepsis	28	1		0	0	1	4	#NULL!	#NULL!	#NULL!	#NULL!	#NULL!	#NULL!	0	1	1	6	0	1	#NULL!	#NULL!	0	3	0	0	4	4	0	5	1	#NULL!	#NULL!	1
787	0	0	99	5	0	2.75	1	1	0	3	1	0	0		0		25	1		0	0	1	4	#NULL!	#NULL!	#NULL!	#NULL!	#NULL!	#NULL!	1	1	1	2	0	1	#NULL!	0	0	3	#NULL!	0	1	1	0	1	1	#NULL!	#NULL!	1
788	1	10	99	5	1	#NULL!	2	1	0	2	0	0	0		0		24	1		0	0	2	4	#NULL!	#NULL!	#NULL!	#NULL!	#NULL!	#NULL!	0	1	1	3	0	1	#NULL!	0	0	#NULL!	0	0	2	#NULL!	0	2	1	#NULL!	#NULL!	1
789	1	7	99	5	0	3.5	4	1	0	2	0	0	0		0		35	1		1	0	4	4	#NULL!	#NULL!	#NULL!	#NULL!	#NULL!	#NULL!	0	1	1	6	0	1	#NULL!	0	0	3	0	0	1	#NULL!	0	1	1	#NULL!	#NULL!	1
790	1	9	99	5	0	#NULL!	2	1	0	2	0	0	0		0		38	1		0	0	2	4	#NULL!	#NULL!	#NULL!	#NULL!	0	#NULL!	0	1	1	4	0	1	#NULL!	0	0	#NULL!	0	0	#NULL!	#NULL!	0	1	#NULL!	#NULL!	#NULL!	1
791	0	3	99	5	0	3.9	4	1	2	2	0	0	0		0		#NULL!	2		1	0	4	4	#NULL!	#NULL!	#NULL!	#NULL!	#NULL!	#NULL!	0	1	1	4	0	1	#NULL!	#NULL!	0	3	1	0	2	3	0	2	1	#NULL!	#NULL!	0
792	1	1	99	5	1	2.03	1	1	0	22	1	0	0	g6pd def	0		26	1		0	0	1	4	#NULL!	#NULL!	#NULL!	#NULL!	#NULL!	#NULL!	0	1	1	13	0	1	#NULL!	#NULL!	0	2	0	0	#NULL!	#NULL!	0	#NULL!	#NULL!	#NULL!	#NULL!	1
793	1	1	99	5	0	3.31	2	1	2	2	0	0	0		0		35	1		0	0	2	4	#NULL!	#NULL!	#NULL!	#NULL!	#NULL!	#NULL!	0	1	1	2	0	1	#NULL!	0	0	3	0	0	1	1	0	1	1	#NULL!	#NULL!	1
794	0	21	#NULL!	5	1	#NULL!	#NULL!	#NULL!	0	4	#NULL!	#NULL!	0		0		44	1		1	0	2	#NULL!	#NULL!	#NULL!	#NULL!	#NULL!	#NULL!	#NULL!	#NULL!	1	#NULL!	5	0	1	#NULL!	#NULL!	0	#NULL!	0	0	3	#NULL!	0	3	#NULL!	#NULL!	#NULL!	1
795	0	0	99	5	1	3.22	#NULL!	1	2	3	2	0	0		0		23	1	trading	1	0	2	#NULL!	#NULL!	#NULL!	#NULL!	#NULL!	#NULL!	#NULL!	#NULL!	#NULL!	#NULL!	6	0	1	#NULL!	#NULL!	0	3	#NULL!	0	1	4	0	1	1	#NULL!	#NULL!	0
796	1	3	99	5	1	2.5	2	1	0	4	0	0	0		0		29	1		0	0	2	#NULL!	#NULL!	#NULL!	#NULL!	#NULL!	#NULL!	#NULL!	#NULL!	#NULL!	#NULL!	2	1	4	5	1	0	2	#NULL!	0	2	#NULL!	0	2	1	#NULL!	#NULL!	1
797	1	3	#NULL!	5	0	3.75	3	1	2	2	0	0	0		0		#NULL!	1		0	#NULL!	3	4	#NULL!	#NULL!	#NULL!	0	0	0	0	#NULL!	#NULL!	2	0	1	#NULL!	#NULL!	0	3	1	0	#NULL!	#NULL!	0	#NULL!	#NULL!	#NULL!	#NULL!	1
798	1	0	99	5	0	4.128	#NULL!	1	2	3	1	0	0		0		#NULL!	1		0	0	#NULL!	4	#NULL!	#NULL!	#NULL!	#NULL!	#NULL!	#NULL!	#NULL!	#NULL!	#NULL!	2	0	1	#NULL!	#NULL!	0	4	#NULL!	0	3	#NULL!	0	4	1	#NULL!	#NULL!	1
799	1	0	33	5	0	2.66	4	1	0	5	0	0	0		0		#NULL!	1		0	0	4	4	#NULL!	#NULL!	#NULL!	0	0	0	0	1	#NULL!	4	0	1	#NULL!	#NULL!	0	3	1	1	#NULL!	#NULL!	0	#NULL!	#NULL!	#NULL!	#NULL!	0
800	1	4	99	5	1	3.4	3	1	0	2	0	0	0		0		25	1		1	0	3	4	0	#NULL!	#NULL!	#NULL!	#NULL!	#NULL!	0	#NULL!	#NULL!	7	0	1	#NULL!	#NULL!	0	3	#NULL!	0	#NULL!	#NULL!	0	#NULL!	1	#NULL!	#NULL!	1
801	0	0	99	5	1	3.066	#NULL!	1	2	3	2	0	0		0		25	1		0	0	1	0	#NULL!	#NULL!	#NULL!	#NULL!	0	#NULL!	0	1	#NULL!	6	0	1	#NULL!	#NULL!	0	3	#NULL!	0	#NULL!	#NULL!	0	#NULL!	1	#NULL!	#NULL!	1
802	1	3	0	5	0	1.612	#NULL!	1	2	1	0	0	0		0	nnj	#NULL!	1		0	0	#NULL!	4	#NULL!	#NULL!	#NULL!	0	0	0	0	#NULL!	#NULL!	3	0	1	#NULL!	#NULL!	0	2	0	0	1	#NULL!	0	1	#NULL!	#NULL!	#NULL!	0
803	0	0	34	5	0	1.918	1	1	0	1	3	0	0		0	sepsis	29	1		0	0	#NULL!	2	#NULL!	#NULL!	2	0	0	0	0	#NULL!	#NULL!	7	0	2	#NULL!	#NULL!	0	2	0	0	1	#NULL!	0	1	#NULL!	#NULL!	#NULL!	1
804	0	5	99	5	1	#NULL!	4	1	0	2	3	1	0		0		30	1		0	0	4	4	#NULL!	#NULL!	#NULL!	#NULL!	#NULL!	#NULL!	1	#NULL!	1	8	0	1	#NULL!	#NULL!	0	#NULL!	0	0	2	#NULL!	0	#NULL!	#NULL!	#NULL!	#NULL!	0
805	1	0	34	5	0	2.2	3	1	2	1	0	0	0		0		31	1		0	0	3	4	#NULL!	#NULL!	#NULL!	0	0	0	1	#NULL!	#NULL!	4	0	1	#NULL!	#NULL!	0	2	0	0	3	#NULL!	0	2	#NULL!	#NULL!	#NULL!	1
806	0	2	99	5	0	3.994	#NULL!	1	0	22	0	0	0	g6pd def	0		32	1		0	0	2	4	#NULL!	#NULL!	#NULL!	0	0	0	0	#NULL!	1	1	0	1	#NULL!	#NULL!	0	3	1	0	#NULL!	#NULL!	0	#NULL!	#NULL!	#NULL!	#NULL!	0
807	1	1	99	5	0	3.13	#NULL!	1	0	22	0	0	0	g6pd def	0		#NULL!	1		0	0	#NULL!	2	#NULL!	#NULL!	2	0	0	0	0	1	1	1	0	1	#NULL!	#NULL!	0	3	0	1	1	#NULL!	0	1	1	1	0	1
808	1	3	#NULL!	5	0	2.536	#NULL!	#NULL!	0	2	0	0	0		0		#NULL!	1		0	0	#NULL!	#NULL!	#NULL!	#NULL!	#NULL!	#NULL!	#NULL!	#NULL!	#NULL!	#NULL!	#NULL!	3	0	1	#NULL!	#NULL!	0	3	1	0	1	#NULL!	0	1	#NULL!	#NULL!	#NULL!	1
809	1	0	32	5	1	1.7	3	1	0	21	3	0	0		0		#NULL!	1		0	0	3	3	#NULL!	#NULL!	2	#NULL!	#NULL!	#NULL!	#NULL!	#NULL!	#NULL!	1	1	4	1	1	0	2	0	0	1	#NULL!	0	1	#NULL!	#NULL!	#NULL!	1
810	1	3	99	5	0	3.8	#NULL!	1	2	2	0	0	0		0		33	1		0	0	2	1	0	0	1	0	0	0	0	1	1	5	0	1	#NULL!	#NULL!	0	3	0	0	3	1	0	2	#NULL!	#NULL!	#NULL!	0
811	1	3	99	5	1	3.2	1	1	0	4	0	0	0		0		22	1		0	0	1	4	#NULL!	#NULL!	#NULL!	#NULL!	#NULL!	#NULL!	0	1	#NULL!	6	0	1	#NULL!	#NULL!	0	3	0	0	2	#NULL!	0	2	1	#NULL!	#NULL!	1
812	1	3	99	5	0	3.7	#NULL!	1	0	2	0	0	0		0		32	1		0	0	1	4	0	0	1	0	0	0	1	1	1	2	0	1	#NULL!	0	0	3	0	0	1	3	0	1	1	#NULL!	#NULL!	1
813	1	5	99	5	1	#NULL!	2	1	0	2	0	0	0		0		31	1		0	0	2	4	#NULL!	#NULL!	#NULL!	#NULL!	#NULL!	#NULL!	1	1	1	6	0	1	#NULL!	#NULL!	0	#NULL!	0	0	#NULL!	#NULL!	0	2	#NULL!	#NULL!	#NULL!	1
814	0	0	99	5	0	3.5	2	1	0	3	3	0	0		0		25	1		0	0	2	4	#NULL!	#NULL!	#NULL!	#NULL!	0	#NULL!	#NULL!	1	1	4	0	1	#NULL!	#NULL!	0	3	1	0	#NULL!	#NULL!	0	#NULL!	#NULL!	#NULL!	#NULL!	1
815	1	3	99	5	0	2.7	4	1	0	2	0	0	0		0		42	1		0	0	4	4	#NULL!	#NULL!	#NULL!	#NULL!	#NULL!	#NULL!	0	1	1	3	0	1	#NULL!	#NULL!	0	3	#NULL!	0	3	#NULL!	0	3	1	0	0	1
816	1	7	99	5	1	#NULL!	1	1	0	2	0	0	0		0		#NULL!	2	trading	1	0	1	4	#NULL!	#NULL!	#NULL!	0	0	0	0	0	0	10	0	1	#NULL!	#NULL!	0	#NULL!	#NULL!	0	2	#NULL!	0	3	1	0	0	1
817	0	0	30	5	1	0.848	3	1	0	1	0	1	0		0		25	1		1	0	3	#NULL!	#NULL!	#NULL!	#NULL!	#NULL!	#NULL!	#NULL!	0	#NULL!	#NULL!	7	1	4	7	1	0	0	0	0	1	#NULL!	0	1	1	#NULL!	#NULL!	1
818	1	1	24	5	0	0.8	#NULL!	2	0	1	0	0	0		0		35	1		#NULL!	#NULL!	4	2	0	0	2	0	0	#NULL!	0	1	1	1	1	4	1	1	0	0	1	0	2	#NULL!	#NULL!	2	1	#NULL!	#NULL!	1
819	1	3	#NULL!	5	0	3	1	1	0	2	0	0	0		0		31	1		0	0	1	4	#NULL!	#NULL!	#NULL!	#NULL!	#NULL!	#NULL!	0	#NULL!	1	3	0	1	#NULL!	0	0	3	#NULL!	0	4	#NULL!	0	6	0	#NULL!	#NULL!	1
820	1	5	99	5	1	#NULL!	#NULL!	1	0	2	0	1	0		0		#NULL!	1		1	2	#NULL!	4	#NULL!	#NULL!	#NULL!	#NULL!	#NULL!	#NULL!	#NULL!	#NULL!	#NULL!	6	0	1	#NULL!	#NULL!	0	#NULL!	1	0	2	#NULL!	0	2	#NULL!	#NULL!	#NULL!	1
821	0	5	#NULL!	5	1	#NULL!	#NULL!	1	0	7	0	#NULL!	1	laryngomalacia	0		#NULL!	#NULL!		0	0	#NULL!	#NULL!	#NULL!	#NULL!	#NULL!	#NULL!	0	0	0	1	1	7	0	1	#NULL!	#NULL!	1	#NULL!	0	0	1	3	0	1	1	0	0	1
822	1	3	#NULL!	5	1	2.4	1	1	2	3	1	0	0		0	nnj	36	2		0	0	1	4	#NULL!	#NULL!	#NULL!	0	0	0	0	1	#NULL!	4	0	1	#NULL!	#NULL!	0	2	1	0	1	#NULL!	0	2	#NULL!	#NULL!	#NULL!	1
823	0	3	#NULL!	5	0	3.5	#NULL!	1	0	2	0	0	0		0		#NULL!	#NULL!		0	0	#NULL!	4	#NULL!	#NULL!	#NULL!	0	0	0	0	1	1	8	0	1	#NULL!	#NULL!	0	3	1	0	#NULL!	#NULL!	0	#NULL!	#NULL!	#NULL!	#NULL!	1
824	0	0	#NULL!	5	0	2.588	#NULL!	#NULL!	2	3	1	0	0		0		#NULL!	#NULL!		0	0	1	4	#NULL!	#NULL!	#NULL!	0	0	0	0	0	1	1	0	1	#NULL!	#NULL!	0	3	0	0	1	#NULL!	0	#NULL!	0	#NULL!	#NULL!	0
825	0	5	38	5	0	3	#NULL!	1	0	4	0	#NULL!	0		0		#NULL!	#NULL!		#NULL!	0	4	4	#NULL!	#NULL!	#NULL!	#NULL!	#NULL!	0	0	1	1	5	0	1	#NULL!	#NULL!	0	3	1	0	1	#NULL!	0	1	#NULL!	#NULL!	#NULL!	1
826	1	0	99	5	0	2.6	#NULL!	1	2	3	3	0	0		0		#NULL!	1		0	0	#NULL!	4	#NULL!	#NULL!	#NULL!	0	0	0	0	#NULL!	#NULL!	6	0	1	#NULL!	0	0	3	1	0	3	#NULL!	0	1	#NULL!	#NULL!	#NULL!	1
827	0	0	33	5	1	0.456	#NULL!	#NULL!	2	1	0	0	0		0		#NULL!	#NULL!		0	0	1	#NULL!	#NULL!	#NULL!	#NULL!	0	#NULL!	#NULL!	#NULL!	1	2	26	0	1	#NULL!	#NULL!	0	0	1	0	2	#NULL!	0	1	#NULL!	#NULL!	#NULL!	1
828	1	3	#NULL!	5	0	3.3	1	1	0	4	0	0	0		0		#NULL!	#NULL!		#NULL!	0	#NULL!	4	#NULL!	#NULL!	#NULL!	0	0	0	#NULL!	1	1	1	0	2	#NULL!	#NULL!	0	3	1	0	4	#NULL!	0	4	#NULL!	#NULL!	#NULL!	1
829	1	3	#NULL!	5	0	3.7	1	1	2	0	0	0	0		0		#NULL!	1		0	0	#NULL!	4	0	0	2	0	0	0	0	#NULL!	#NULL!	3	0	1	#NULL!	0	0	3	0	1	#NULL!	3	#NULL!	#NULL!	#NULL!	#NULL!	#NULL!	1
830	1	2	35	5	0	3	1	1	2	7	0	0	1	PUV	1	nnj	37	1		0	0	1	1	0	0	1	0	0	0	0	1	2	7	0	1	#NULL!	0	1	3	0	0	1	#NULL!	0	1	1	1	0	0
831	0	21	#NULL!	5	1	#NULL!	#NULL!	1	0	19	0	1	0		0	sepsis	21	1	unemployed	0	0	1	0	#NULL!	#NULL!	3	1	0	#NULL!	0	1	0	7	0	1	#NULL!	#NULL!	0	#NULL!	0	0	1	3	0	1	1	#NULL!	#NULL!	1
832	1	0	99	5	0	3.5	#NULL!	1	0	3	3	0	0		0		25	1		0	0	1	4	#NULL!	#NULL!	#NULL!	0	0	0	0	1	1	5	0	1	#NULL!	0	0	3	1	0	#NULL!	#NULL!	0	#NULL!	#NULL!	#NULL!	#NULL!	1
833	0	7	#NULL!	5	1	3.9	#NULL!	1	0	2	0	#NULL!	0		0		#NULL!	2		0	0	#NULL!	#NULL!	#NULL!	#NULL!	#NULL!	0	0	0	0	#NULL!	#NULL!	2	0	1	#NULL!	#NULL!	0	3	0	0	1	#NULL!	0	#NULL!	#NULL!	#NULL!	#NULL!	1
834	1	3	#NULL!	5	1	3.9	1	1	0	3	3	#NULL!	0		0		25	1	trading	#NULL!	0	1	4	#NULL!	#NULL!	#NULL!	0	0	#NULL!	0	1	0	10	0	1	#NULL!	#NULL!	0	3	0	0	#NULL!	#NULL!	0	#NULL!	#NULL!	#NULL!	#NULL!	1
835	1	4	99	5	0	3.5	#NULL!	1	0	2	0	0	0		0		#NULL!	1		0	1	#NULL!	4	#NULL!	#NULL!	#NULL!	0	0	0	0	1	#NULL!	5	0	1	#NULL!	0	0	3	0	0	1	2	0	1	1	#NULL!	#NULL!	1
836	1	3	#NULL!	5	0	2.9	4	1	0	22	0	0	0	g6pd def	0		31	1		1	0	4	#NULL!	0	0	#NULL!	#NULL!	0	0	0	1	0	7	0	1	#NULL!	#NULL!	0	3	0	0	1	3	0	1	1	#NULL!	#NULL!	1
837	1	0	99	5	1	3.676	2	1	0	16	1	0	0		0		29	2		0	0	2	4	#NULL!	#NULL!	#NULL!	#NULL!	#NULL!	#NULL!	1	#NULL!	#NULL!	10	0	1	#NULL!	#NULL!	0	3	0	0	2	4	0	2	1	#NULL!	#NULL!	1
838	0	0	99	5	1	#NULL!	#NULL!	1	0	3	3	#NULL!	0		0	sepsis	26	1		#NULL!	0	1	4	0	#NULL!	#NULL!	0	0	0	0	1	1	15	0	1	#NULL!	#NULL!	0	#NULL!	0	0	#NULL!	#NULL!	0	#NULL!	#NULL!	#NULL!	#NULL!	1
839	0	5	35	5	1	2.614	#NULL!	1	2	2	0	0	0		0		33	2		1	0	1	4	#NULL!	#NULL!	#NULL!	0	0	0	0	1	#NULL!	6	0	1	#NULL!	#NULL!	0	3	#NULL!	0	3	#NULL!	0	3	1	#NULL!	#NULL!	1
840	1	0	34	5	0	1.894	2	1	2	1	0	0	0		0		28	1		0	0	2	2	#NULL!	#NULL!	#NULL!	#NULL!	#NULL!	#NULL!	0	1	2	6	0	1	#NULL!	#NULL!	0	2	0	0	2	4	#NULL!	2	1	#NULL!	#NULL!	0
841	0	0	26	5	1	0.78	1	2	0	1	0	0	0		0	sepsis	26	1		0	0	1	4	#NULL!	#NULL!	#NULL!	#NULL!	#NULL!	#NULL!	0	1	#NULL!	8	1	4	8	1	0	0	0	0	1	2	0	1	1	#NULL!	#NULL!	0
842	0	26	99	5	0	#NULL!	#NULL!	1	2	4	0	0	0		0		#NULL!	1		0	0	#NULL!	1	0	0	2	0	0	0	1	#NULL!	1	4	0	1	#NULL!	#NULL!	0	#NULL!	0	0	2	3	0	2	1	#NULL!	#NULL!	1
843	1	18	99	5	1	#NULL!	3	1	0	4	0	0	0		0		#NULL!	1		0	0	3	3	0	0	2	0	0	0	0	1	1	5	0	1	#NULL!	#NULL!	0	#NULL!	0	0	1	#NULL!	0	1	1	#NULL!	#NULL!	0
844	0	0	36	5	0	2.542	#NULL!	2	2	3	1	#NULL!	0		0	nnj	#NULL!	1		0	0	#NULL!	2	0	0	2	0	0	0	0	1	1	5	0	1	#NULL!	#NULL!	0	3	1	0	4	4	0	4	#NULL!	#NULL!	#NULL!	1
845	0	8	41	5	1	#NULL!	3	1	0	2	0	0	0		0		33	1		0	0	3	4	0	0	#NULL!	0	0	#NULL!	0	1	1	3	0	1	#NULL!	#NULL!	0	#NULL!	1	0	3	4	0	4	#NULL!	#NULL!	#NULL!	1
846	1	0	33	5	1	1.644	1	2	0	1	0	0	0		0		17	1	student	1	0	1	3	0	0	2	0	0	0	0	0	1	10	0	1	#NULL!	#NULL!	0	2	1	0	3	3	0	2	1	1	0	1
847	0	0	33	5	1	1.854	2	2	0	1	0	0	0		0		17	1	student	1	0	1	3	0	0	2	0	0	0	0	0	1	10	0	1	#NULL!	#NULL!	0	2	0	0	3	4	0	3	1	#NULL!	#NULL!	1
848	1	11	#NULL!	5	1	#NULL!	#NULL!	1	0	2	0	0	0		0		26	1		0	0	#NULL!	1	0	0	2	0	0	0	1	1	1	2	0	2	#NULL!	#NULL!	0	#NULL!	0	0	3	4	0	3	1	#NULL!	#NULL!	1
849	0	0	99	5	1	3	1	1	0	3	3	0	0		0		21	2		1	0	1	3	0	0	#NULL!	0	#NULL!	#NULL!	0	1	1	6	0	1	#NULL!	#NULL!	0	3	0	0	3	3	0	3	1	#NULL!	#NULL!	1
850	1	0	33	5	0	#NULL!	1	2	2	7	1	0	1	left undescended testis	0		30	1		#NULL!	#NULL!	1	1	0	0	1	0	0	0	0	1	1	11	0	1	#NULL!	0	0	#NULL!	0	0	1	3	0	1	1	1	0	1
851	1	5	#NULL!	5	1	#NULL!	2	1	0	2	0	0	0		0		24	1	trading	0	0	#NULL!	2	0	0	2	0	0	0	0	1	#NULL!	1	1	4	5	1	0	#NULL!	0	0	3	#NULL!	0	3	1	#NULL!	#NULL!	1
852	0	0	#NULL!	5	1	1.768	3	2	0	3	1	0	0		0		#NULL!	1		1	0	2	4	0	0	#NULL!	0	0	0	1	1	#NULL!	5	0	1	#NULL!	#NULL!	0	2	1	0	1	2	0	1	1	#NULL!	#NULL!	1
853	0	0	28	5	1	1.518	3	2	0	1	0	0	0		0		#NULL!	1		1	0	2	4	0	0	#NULL!	0	#NULL!	#NULL!	0	1	#NULL!	16	0	1	#NULL!	#NULL!	0	2	0	0	1	5	0	1	1	#NULL!	#NULL!	0
854	0	4	39	5	0	2.23	1	2	2	2	0	0	0		0		31	1		0	0	1	4	0	0	2	0	0	0	0	1	1	3	0	1	#NULL!	#NULL!	0	2	0	0	2	#NULL!	0	2	1	#NULL!	#NULL!	1
855	1	4	39	5	0	2.1	2	2	2	2	0	0	0		0		31	1		0	0	1	4	0	0	2	0	0	0	0	1	1	3	0	1	#NULL!	#NULL!	0	2	1	0	2	3	0	1	1	#NULL!	#NULL!	1
856	1	0	35	5	1	3.4	1	1	1	3	3	0	0		0		#NULL!	1		0	0	1	4	0	0	#NULL!	#NULL!	#NULL!	#NULL!	0	1	#NULL!	5	0	1	#NULL!	#NULL!	0	3	0	0	3	3	0	3	1	#NULL!	#NULL!	0
857	0	3	#NULL!	5	1	3.1	3	1	0	7	0	0	1	cystic hygroma	0		#NULL!	2		1	0	3	4	0	0	#NULL!	#NULL!	#NULL!	#NULL!	0	1	#NULL!	4	0	3	#NULL!	#NULL!	1	3	#NULL!	0	2	1	0	2	1	1	0	0
858	0	0	32	5	1	2.4	3	1	2	1	2	0	0		0		30	1		1	2	3	0	0	0	#NULL!	#NULL!	#NULL!	#NULL!	0	1	0	4	0	1	#NULL!	#NULL!	0	2	1	0	1	3	0	1	1	#NULL!	#NULL!	1
859	0	1	41	5	1	3.3	2	1	0	5	0	0	0		0	nnj	#NULL!	1		0	0	2	4	0	0	#NULL!	#NULL!	#NULL!	#NULL!	0	1	1	8	0	1	#NULL!	#NULL!	0	3	1	0	4	1	0	2	1	#NULL!	#NULL!	0
860	1	0	35	5	1	2.3	2	1	0	1	0	0	0		0		30	2		0	0	2	3	0	0	2	0	0	0	1	1	#NULL!	6	0	1	#NULL!	#NULL!	0	2	1	0	3	1	0	2	1	#NULL!	#NULL!	0
861	1	2	#NULL!	5	1	3.3	1	1	2	5	3	0	0		0		#NULL!	2		1	0	1	#NULL!	#NULL!	#NULL!	#NULL!	#NULL!	#NULL!	#NULL!	#NULL!	1	#NULL!	5	0	1	#NULL!	#NULL!	0	3	0	0	4	5	0	4	1	1	0	1
862	0	9	#NULL!	5	1	2.12	#NULL!	1	0	2	0	0	0		0		#NULL!	1		0	0	#NULL!	2	0	0	2	0	0	0	1	1	#NULL!	5	0	1	#NULL!	#NULL!	0	2	0	1	1	#NULL!	0	1	1	#NULL!	#NULL!	1
863	0	0	32	5	1	1.34	2	3	0	1	0	0	0		0		25	2		1	0	2	2	0	0	2	0	0	0	0	1	1	23	0	1	#NULL!	#NULL!	0	1	1	0	2	5	0	2	1	#NULL!	#NULL!	1
864	0	9	#NULL!	5	1	3.5	1	#NULL!	0	2	0	0	0		0		#NULL!	1		0	0	1	2	0	0	2	0	0	0	0	1	1	2	0	1	#NULL!	#NULL!	0	3	1	0	1	5	0	2	1	#NULL!	#NULL!	1
865	0	2	#NULL!	5	0	2.24	3	1	2	5	0	#NULL!	0		0	nnj	#NULL!	1		0	#NULL!	3	#NULL!	#NULL!	#NULL!	#NULL!	#NULL!	#NULL!	#NULL!	#NULL!	#NULL!	#NULL!	7	0	1	#NULL!	0	0	2	0	0	#NULL!	#NULL!	0	#NULL!	1	#NULL!	#NULL!	0
866	0	0	99	5	1	2.69	3	1	0	3	3	0	0		0		25	1		1	0	4	2	0	0	2	0	0	0	0	1	#NULL!	12	0	1	#NULL!	#NULL!	0	3	#NULL!	0	3	4	0	3	#NULL!	#NULL!	#NULL!	1
867	1	0	#NULL!	3	1	0.956	#NULL!	2	0	1	#NULL!	#NULL!	0		0		#NULL!	#NULL!		0	0	1	#NULL!	#NULL!	#NULL!	#NULL!	#NULL!	#NULL!	#NULL!	#NULL!	0	#NULL!	6	1	4	6	1	0	0	1	0	2	3	0	2	1	1	0	1
868	1	0	26	4	0	2.12	1	1	2	7	3	0	1	potter's syndrome	1		23	1		1	0	1	2	0	0	2	0	0	0	0	1	2	1	1	4	1	1	1	2	#NULL!	0	3	#NULL!	0	3	1	1	0	1
869	1	0	31	4	0	1.338	1	3	2	7	#NULL!	0	1	PDA, VSD	0	ARF	#NULL!	1		1	0	1	4	0	0	2	0	0	0	0	1	1	24	1	4	24	1	1	1	#NULL!	0	2	1	0	2	1	#NULL!	#NULL!	0
870	0	1	#NULL!	4	1	3.4	1	1	0	3	2	0	0		0	sepsis	29	2		0	0	1	4	0	0	2	0	0	0	0	1	#NULL!	1	1	4	2	1	0	3	0	0	1	#NULL!	0	1	#NULL!	#NULL!	#NULL!	0
871	0	6	#NULL!	4	1	#NULL!	4	1	0	2	0	0	0		0		#NULL!	1		0	#NULL!	4	0	0	0	3	0	0	0	0	#NULL!	0	3	1	4	9	1	0	#NULL!	1	0	1	4	0	1	#NULL!	#NULL!	#NULL!	1
872	1	4	#NULL!	4	1	#NULL!	3	1	0	2	0	0	0		0		#NULL!	1		1	0	3	4	0	0	#NULL!	0	0	0	0	1	1	1	1	4	5	1	0	#NULL!	0	0	1	3	0	1	1	#NULL!	#NULL!	1
873	1	17	30	4	1	#NULL!	2	1	0	4	0	1	0		0		28	1	trading	1	0	2	0	0	0	3	0	0	0	0	1	0	1	1	4	18	1	0	#NULL!	0	0	3	5	0	3	1	#NULL!	#NULL!	1
874	1	0	42	4	0	3.356	#NULL!	1	2	5	2	0	0		0		24	1		#NULL!	#NULL!	1	2	0	0	2	0	0	0	0	1	1	1	1	4	1	1	0	3	0	0	2	#NULL!	0	1	#NULL!	#NULL!	#NULL!	0
875	0	9	32	4	1	1.34	#NULL!	1	0	1	0	0	0		0		36	1		0	0	3	2	0	0	2	0	0	0	0	1	1	10	1	4	18	1	0	1	0	0	3	#NULL!	0	2	1	#NULL!	#NULL!	0
876	1	6	35	4	0	1.9	#NULL!	1	0	1	0	0	0		0		23	1		0	0	2	2	0	0	2	1	0	0	#NULL!	1	1	2	1	4	10	1	0	2	0	0	1	4	0	1	1	#NULL!	#NULL!	1
877	0	1	30	5	1	1.4	#NULL!	1	0	1	0	0	0		0		27	1		0	0	3	2	0	0	2	0	0	0	0	1	1	2	1	4	2	1	0	1	0	0	2	#NULL!	0	2	#NULL!	#NULL!	#NULL!	1
878	1	3	37	4	1	2.2	#NULL!	1	0	4	0	0	0		0		27	2		0	0	#NULL!	2	0	0	2	0	0	0	0	1	1	2	1	4	5	1	0	2	1	0	2	6	0	2	1	1	0	1
879	0	0	27	4	1	0.9	#NULL!	1	0	1	0	0	0		0		31	1		0	0	2	2	#NULL!	0	2	0	0	#NULL!	0	1	1	12	1	4	12	1	0	0	0	0	2	3	0	2	1	#NULL!	#NULL!	1
880	1	0	25	4	0	1.06	#NULL!	1	0	1	0	0	0		0		23	1		0	0	3	2	0	0	2	#NULL!	0	0	0	1	1	1	1	4	1	1	0	1	1	0	1	3	0	1	1	#NULL!	#NULL!	0
881	1	0	28	4	1	1	#NULL!	1	0	1	0	0	0		0		30	1		0	0	1	2	0	0	2	0	0	0	0	1	1	4	1	4	4	1	0	0	0	0	1	3	0	1	1	#NULL!	#NULL!	1
882	1	0	38	4	1	2.8	#NULL!	1	0	3	3	0	0		0		36	1		0	0	4	2	0	0	2	0	0	0	0	1	1	1	1	4	1	1	0	3	0	0	#NULL!	#NULL!	0	#NULL!	#NULL!	#NULL!	#NULL!	1
883	0	1	40	4	0	3.15	#NULL!	1	0	3	3	0	0		0		26	1		0	0	1	2	0	0	2	0	0	0	0	1	1	2	1	4	2	1	0	3	0	0	2	#NULL!	0	2	#NULL!	#NULL!	#NULL!	0
884	0	10	38	4	0	3.2	#NULL!	1	0	4	0	0	0		0		32	1		0	0	2	2	0	0	2	0	0	0	0	1	1	1	1	4	11	1	0	3	0	0	1	3	0	1	1	#NULL!	#NULL!	1
885	1	0	38	4	1	3.2	#NULL!	1	0	3	3	0	0		0		27	1		0	0	3	2	0	0	2	0	0	0	0	1	1	1	1	4	1	1	0	3	1	0	1	#NULL!	0	1	1	#NULL!	#NULL!	1
886	1	3	#NULL!	4	1	3.2	3	1	0	2	0	0	0		0	sepsis	35	1		0	0	3	2	0	0	2	0	0	0	0	1	1	2	1	4	5	1	0	3	0	0	1	3	0	1	1	#NULL!	#NULL!	1
887	0	1	#NULL!	4	1	3.14	1	1	2	3	3	0	0		0		18	1		1	0	1	4	0	0	#NULL!	0	0	0	0	0	1	2	1	4	2	1	0	3	0	0	1	1	0	1	1	#NULL!	#NULL!	1
888	1	1	27	4	1	1	1	2	0	1	2	0	0		0		#NULL!	2		0	0	1	#NULL!	#NULL!	#NULL!	#NULL!	#NULL!	#NULL!	#NULL!	#NULL!	#NULL!	#NULL!	1	1	4	1	1	0	0	0	1	2	1	0	2	1	#NULL!	#NULL!	1
889	1	0	24	4	0	0.816	1	1	0	1	#NULL!	0	0		0		#NULL!	1		0	0	1	#NULL!	#NULL!	#NULL!	#NULL!	#NULL!	#NULL!	#NULL!	#NULL!	#NULL!	#NULL!	1	1	4	1	1	0	0	0	0	4	4	0	4	1	#NULL!	#NULL!	1
890	0	0	#NULL!	4	1	4	#NULL!	1	0	7	3	#NULL!	1	myelomeningocoele	0		#NULL!	#NULL!		#NULL!	#NULL!	#NULL!	#NULL!	#NULL!	#NULL!	#NULL!	#NULL!	#NULL!	#NULL!	#NULL!	#NULL!	#NULL!	1	1	4	1	1	1	3	#NULL!	1	#NULL!	#NULL!	#NULL!	#NULL!	#NULL!	#NULL!	#NULL!	1
891	0	0	36	4	1	2.126	1	1	2	3	3	0	0		0		#NULL!	2		1	0	1	#NULL!	#NULL!	#NULL!	#NULL!	#NULL!	#NULL!	#NULL!	#NULL!	#NULL!	#NULL!	5	1	4	5	1	0	2	0	1	2	5	0	2	1	#NULL!	#NULL!	1
892	1	1	99	4	1	4.8	2	1	0	3	3	0	0		0		28	1		0	0	2	4	0	0	#NULL!	0	0	0	0	1	#NULL!	1	1	4	2	1	0	4	0	0	4	#NULL!	0	4	1	#NULL!	#NULL!	1
893	1	4	#NULL!	4	1	3.054	3	#NULL!	0	2	#NULL!	0	0		0		#NULL!	1		0	0	3	#NULL!	#NULL!	#NULL!	#NULL!	#NULL!	#NULL!	#NULL!	#NULL!	#NULL!	#NULL!	1	1	4	4	1	0	3	0	0	1	3	0	1	1	#NULL!	#NULL!	1
894	0	0	#NULL!	4	1	3.5	3	1	2	3	3	0	0		0		#NULL!	1		1	0	3	#NULL!	#NULL!	#NULL!	#NULL!	#NULL!	#NULL!	#NULL!	#NULL!	#NULL!	#NULL!	1	1	4	1	1	0	3	0	0	2	4	0	2	1	#NULL!	#NULL!	1
895	1	0	37	4	1	2.8	#NULL!	1	0	4	0	0	0		0		27	1		0	0	2	2	0	0	2	0	0	0	0	1	1	2	1	4	2	1	0	3	#NULL!	1	#NULL!	6	0	2	#NULL!	#NULL!	#NULL!	1
896	0	1	39	4	1	2.1	#NULL!	1	0	3	3	0	0		0		27	1		1	0	3	0	0	0	3	0	0	0	0	1	0	3	1	4	3	1	0	2	0	0	#NULL!	1	0	2	#NULL!	#NULL!	#NULL!	1
897	1	0	38	4	0	3.2	#NULL!	1	0	3	1	0	0		0		#NULL!	1		0	0	2	2	0	0	2	#NULL!	0	0	0	1	1	2	0	1	#NULL!	#NULL!	0	3	0	0	2	3	0	2	#NULL!	#NULL!	#NULL!	0
898	1	0	32	4	1	1.9	#NULL!	1	0	4	0	0	0		0		28	1		0	0	3	2	0	0	2	0	0	0	0	1	1	1	1	4	1	1	0	2	#NULL!	0	3	#NULL!	#NULL!	3	1	#NULL!	#NULL!	1
899	0	0	32	5	1	1.5	#NULL!	1	0	1	0	0	0		0	sepsis	32	1		0	0	2	2	0	0	2	0	0	0	0	1	1	3	1	4	3	1	0	1	0	0	#NULL!	#NULL!	0	#NULL!	1	#NULL!	#NULL!	1
900	0	0	39	5	1	2.8	#NULL!	1	0	3	3	1	0		0		25	1		0	1	3	0	0	0	3	0	0	0	0	1	0	1	0	4	#NULL!	#NULL!	0	3	1	0	4	#NULL!	0	4	1	#NULL!	#NULL!	1
901	1	0	#NULL!	5	0	#NULL!	1	2	2	1	0	0	0		0		30	1		0	0	1	2	0	0	2	0	0	0	0	1	1	10	0	1	#NULL!	#NULL!	0	#NULL!	0	0	3	1	0	3	1	#NULL!	#NULL!	1
902	0	3	36	5	0	1.8	#NULL!	2	0	2	0	0	0		0		29	1		0	0	3	2	0	0	2	0	0	0	0	1	1	6	0	1	#NULL!	#NULL!	0	2	0	0	#NULL!	1	0	1	0	#NULL!	#NULL!	1
903	0	0	29	5	1	1.6	#NULL!	2	0	22	0	0	0	g6pd def	0		26	1		0	0	2	2	0	0	2	0	0	0	0	1	1	16	0	1	#NULL!	#NULL!	0	2	#NULL!	0	4	#NULL!	0	3	1	#NULL!	#NULL!	1
904	1	4	39	5	0	3.154	#NULL!	1	0	2	3	0	0		0		28	1		0	0	3	2	0	0	2	0	0	0	0	1	1	3	0	1	#NULL!	0	0	3	1	0	#NULL!	#NULL!	0	#NULL!	1	#NULL!	#NULL!	1
905	1	2	#NULL!	5	1	2.478	#NULL!	1	0	3	3	1	0		0		24	1		0	0	1	0	0	0	3	0	0	0	0	1	0	3	0	2	#NULL!	#NULL!	0	2	1	0	1	3	0	#NULL!	1	1	0	0
906	0	5	#NULL!	5	1	3.7	#NULL!	1	0	2	0	0	0		0		32	1		0	0	2	2	0	0	2	0	0	0	0	1	1	3	0	1	#NULL!	#NULL!	0	3	0	0	4	3	0	4	1	#NULL!	#NULL!	1
907	0	5	33	5	1	2.5	#NULL!	1	0	2	0	0	0		0		36	2		0	0	2	2	0	0	2	0	0	0	0	1	1	3	0	1	#NULL!	#NULL!	0	2	1	0	3	4	0	3	1	#NULL!	#NULL!	1
908	0	0	32	5	0	1.112	#NULL!	1	2	1	0	0	0		0		32	1		1	0	4	2	0	0	2	0	0	0	0	1	2	42	0	1	#NULL!	0	0	1	0	0	#NULL!	4	0	2	1	#NULL!	#NULL!	1
909	1	3	40	5	0	3.2	#NULL!	1	0	2	0	#NULL!	0		0		40	1		0	0	3	2	0	0	2	0	0	0	0	1	1	3	0	1	#NULL!	#NULL!	0	3	0	0	#NULL!	#NULL!	0	#NULL!	1	1	0	1
910	0	2	30	5	0	3.5	#NULL!	1	0	8	0	0	0		0		29	#NULL!		0	0	2	2	0	0	2	0	0	0	0	1	1	4	0	1	#NULL!	#NULL!	0	3	#NULL!	0	#NULL!	#NULL!	0	#NULL!	#NULL!	#NULL!	#NULL!	1
911	1	4	38	5	0	3.3	#NULL!	1	2	2	0	0	0		0		39	#NULL!		0	0	4	2	0	0	2	0	0	0	0	1	1	3	0	1	#NULL!	#NULL!	0	3	1	0	3	#NULL!	0	3	1	1	0	0
912	0	0	39	5	0	2.43	#NULL!	1	0	3	2	0	0		0		36	1		0	0	3	2	0	0	2	0	0	0	0	1	1	5	0	1	#NULL!	#NULL!	0	2	0	0	#NULL!	4	0	2	1	0	0	1
913	0	0	32	5	1	1.38	#NULL!	3	0	1	0	0	0		0		25	#NULL!		1	0	2	2	0	0	2	0	0	0	0	1	1	23	0	1	#NULL!	#NULL!	0	1	0	0	1	1	0	1	1	#NULL!	#NULL!	1
914	1	0	29	5	1	1.25	#NULL!	2	0	1	0	0	0		0		43	#NULL!		0	0	5	2	0	0	2	0	0	0	0	1	1	46	0	1	#NULL!	#NULL!	0	1	0	0	#NULL!	4	0	1	1	0	0	1
915	0	4	#NULL!	5	0	3.094	#NULL!	1	0	2	0	0	0		0		26	1		0	0	2	2	0	0	2	0	0	0	0	1	1	2	0	1	#NULL!	#NULL!	0	3	0	0	2	4	0	2	1	#NULL!	#NULL!	1
916	1	0	38	5	1	3.2	#NULL!	1	0	4	3	0	0		0		32	#NULL!		1	0	3	2	0	0	2	0	0	0	0	1	1	14	0	1	#NULL!	#NULL!	0	3	0	0	2	1	0	2	1	#NULL!	#NULL!	1
917	1	3	#NULL!	5	1	3.6	#NULL!	1	0	4	0	0	0		0		33	2		0	0	#NULL!	2	0	0	2	0	0	0	0	1	1	5	0	1	#NULL!	#NULL!	0	3	0	0	4	6	0	4	1	#NULL!	#NULL!	1
918	0	1	30	3	1	1.32	4	1	0	1	0	0	0		0		33	#NULL!		1	0	4	2	0	0	2	0	0	0	0	1	1	1	1	4	2	1	0	1	0	0	1	#NULL!	0	1	1	#NULL!	#NULL!	1
919	0	2	34	3	1	1.4	3	1	0	1	0	0	0		0		26	#NULL!		0	#NULL!	3	2	0	0	2	0	0	0	0	1	1	6	1	4	8	1	0	1	1	0	3	1	0	3	#NULL!	#NULL!	#NULL!	0
920	1	0	38	3	1	2.4	2	1	0	3	1	0	0		0		23	#NULL!		0	0	2	2	0	0	2	0	0	0	0	1	1	1	1	4	1	1	0	2	1	0	#NULL!	4	#NULL!	4	1	1	0	0
921	1	0	38	4	1	2.94	1	#NULL!	2	3	3	0	0		0		26	1		1	3	1	2	0	0	2	0	0	0	0	1	#NULL!	5	1	4	5	1	0	3	#NULL!	0	1	4	0	1	1	#NULL!	#NULL!	1
922	1	0	28	4	0	0.6	4	2	0	1	0	0	0		0		36	#NULL!		0	0	4	0	0	0	3	0	0	#NULL!	0	0	0	1	1	4	1	1	0	0	0	0	#NULL!	#NULL!	2	#NULL!	1	#NULL!	#NULL!	1
923	1	0	33	4	0	1.66	3	1	2	1	0	#NULL!	0		0		37	1		0	0	3	2	0	0	2	0	0	0	0	1	1	4	1	4	4	1	0	2	#NULL!	0	#NULL!	#NULL!	0	#NULL!	#NULL!	#NULL!	#NULL!	1
924	0	7	31	4	1	1	#NULL!	1	0	1	0	0	0		0		18	1		0	0	#NULL!	1	0	0	2	0	0	0	0	0	1	2	1	4	9	1	0	0	#NULL!	0	1	5	0	1	1	#NULL!	#NULL!	1
925	0	0	#NULL!	4	1	1.358	#NULL!	3	2	1	0	0	0		0		42	1		1	0	3	2	0	0	2	0	0	0	0	1	1	43	0	1	44	1	0	1	#NULL!	0	#NULL!	#NULL!	0	#NULL!	1	#NULL!	#NULL!	1
926	1	0	28	4	0	0.68	2	2	0	3	3	0	0		0		26	#NULL!		0	0	2	0	#NULL!	#NULL!	3	0	0	0	0	1	0	2	1	4	2	1	0	0	#NULL!	0	#NULL!	#NULL!	0	1	1	#NULL!	#NULL!	1
927	1	0	40	4	1	3.5	#NULL!	1	2	3	3	0	0		0		30	1		1	0	2	2	0	0	2	0	0	0	0	1	1	2	1	4	2	1	0	3	0	0	#NULL!	#NULL!	0	4	1	#NULL!	#NULL!	1
928	1	0	38	4	1	3.3	2	1	0	3	3	0	0		0		36	1		0	0	2	2	0	0	2	0	0	0	0	1	1	1	1	4	1	1	0	3	0	0	#NULL!	#NULL!	0	#NULL!	1	#NULL!	#NULL!	1
929	0	0	39	5	0	3.8	2	1	0	2	0	#NULL!	0		0		#NULL!	2		0	0	2	2	0	0	2	0	0	0	0	1	1	2	0	1	#NULL!	#NULL!	0	3	1	0	#NULL!	#NULL!	0	1	#NULL!	#NULL!	#NULL!	1
930	0	3	#NULL!	5	1	3.4	#NULL!	#NULL!	2	22	0	0	0	g6pd def	0		32	1		0	0	2	2	0	0	2	0	0	0	0	1	1	4	0	1	#NULL!	#NULL!	0	3	#NULL!	0	3	#NULL!	0	3	1	#NULL!	#NULL!	1
931	0	0	36	5	0	2	#NULL!	1	2	19	0	0	0		0	nnj	29	1		0	0	1	2	0	0	2	0	0	0	0	1	1	6	0	1	#NULL!	#NULL!	0	2	#NULL!	0	1	#NULL!	0	#NULL!	1	#NULL!	#NULL!	0
932	0	0	#NULL!	5	0	3.306	4	1	2	3	2	0	0		0		40	1		0	0	4	2	0	0	2	0	0	0	0	1	1	5	0	1	#NULL!	#NULL!	0	3	#NULL!	0	1	#NULL!	0	#NULL!	1	1	0	1
933	0	6	37	5	1	#NULL!	1	1	0	22	0	0	0	g6pd def	0		#NULL!	1		1	0	1	0	0	0	#NULL!	0	0	0	0	0	1	7	0	1	#NULL!	#NULL!	0	#NULL!	#NULL!	0	4	3	0	4	1	#NULL!	#NULL!	1
934	1	2	99	5	#NULL!	3.53	3	1	2	2	0	0	0		0		#NULL!	1		0	0	3	#NULL!	#NULL!	#NULL!	#NULL!	#NULL!	#NULL!	#NULL!	#NULL!	1	1	4	0	1	#NULL!	#NULL!	0	3	1	0	1	5	0	1	1	0	0	1
935	0	1	99	5	0	2.724	1	1	0	2	0	0	0		0		25	1		0	0	1	4	0	0	#NULL!	0	0	0	0	1	1	2	0	1	#NULL!	#NULL!	0	3	#NULL!	1	#NULL!	1	0	1	0	2	1	1
936	1	3	#NULL!	5	1	2.9	1	1	0	22	0	0	0	g6pd def	0		26	1		1	0	1	4	0	0	#NULL!	#NULL!	#NULL!	#NULL!	0	1	#NULL!	3	0	1	#NULL!	#NULL!	0	3	0	0	2	#NULL!	0	2	1	1	0	1
937	0	5	#NULL!	5	1	#NULL!	#NULL!	1	0	2	0	0	0		0		#NULL!	2		0	0	#NULL!	#NULL!	#NULL!	#NULL!	#NULL!	#NULL!	#NULL!	#NULL!	#NULL!	#NULL!	#NULL!	2	0	1	#NULL!	#NULL!	0	#NULL!	0	0	#NULL!	1	0	1	1	#NULL!	#NULL!	1
938	1	0	99	5	1	3.46	1	1	0	3	3	0	0		0		26	1		1	2	1	4	0	0	#NULL!	0	0	#NULL!	1	#NULL!	#NULL!	3	1	4	3	1	0	3	#NULL!	0	#NULL!	#NULL!	0	#NULL!	#NULL!	#NULL!	#NULL!	1
939	0	3	#NULL!	5	1	3.5	2	1	2	2	0	#NULL!	0		0		32	2		0	0	2	3	0	0	2	0	0	0	0	#NULL!	1	3	0	1	#NULL!	#NULL!	0	3	#NULL!	0	1	1	0	1	1	#NULL!	#NULL!	1
940	1	5	#NULL!	5	1	#NULL!	1	1	0	2	#NULL!	0	0		0		33	1	vet drug sales	0	0	1	2	0	0	2	0	0	0	1	1	1	6	0	1	#NULL!	0	0	#NULL!	0	0	#NULL!	#NULL!	1	#NULL!	1	#NULL!	#NULL!	1
941	0	4	99	5	1	#NULL!	#NULL!	1	0	2	0	0	0		0		33	1		0	0	3	4	#NULL!	#NULL!	#NULL!	#NULL!	#NULL!	#NULL!	#NULL!	#NULL!	#NULL!	2	0	1	#NULL!	#NULL!	0	#NULL!	#NULL!	0	4	4	0	4	#NULL!	#NULL!	#NULL!	1
942	0	0	30	5	0	1.278	2	1	0	1	3	0	0		0		35	1		0	0	2	4	0	0	2	0	0	0	0	1	1	15	0	1	#NULL!	0	0	1	0	0	2	3	0	2	1	#NULL!	#NULL!	1
943	1	0	#NULL!	5	1	#NULL!	4	1	0	8	0	1	0		0		#NULL!	1		0	0	4	0	0	0	3	0	0	0	0	1	0	1	1	4	1	1	0	#NULL!	0	0	#NULL!	3	0	1	1	#NULL!	#NULL!	1
944	0	2	38	5	0	2.9	#NULL!	#NULL!	0	2	0	0	0		0		26	1		0	0	2	0	0	0	0	0	0	0	0	1	1	2	0	1	#NULL!	#NULL!	0	3	1	0	#NULL!	4	0	1	1	#NULL!	#NULL!	1
945	1	2	39	5	0	2.69	#NULL!	1	0	2	0	0	0		0		27	1		0	0	3	2	0	0	2	0	0	0	0	1	1	2	0	1	#NULL!	#NULL!	0	3	1	0	2	3	0	2	1	#NULL!	#NULL!	1
946	0	0	#NULL!	5	0	3.262	#NULL!	1	2	2	0	0	0		0		27	#NULL!		0	0	1	2	0	0	2	0	0	0	0	1	1	3	0	1	#NULL!	#NULL!	0	3	1	0	1	3	0	1	1	#NULL!	#NULL!	0
947	1	4	#NULL!	5	1	#NULL!	3	1	0	2	0	0	0		0		#NULL!	1		0	0	3	4	0	0	#NULL!	0	#NULL!	#NULL!	0	1	1	3	0	2	#NULL!	#NULL!	0	#NULL!	0	1	#NULL!	#NULL!	0	#NULL!	1	1	0	1
948	1	0	99	5	0	4.45	4	1	0	6	0	0	0		0		28	1		0	0	3	4	0	1	2	0	0	0	0	1	#NULL!	1	0	1	#NULL!	0	0	4	0	1	3	#NULL!	0	3	1	1	0	1
949	1	0	34	5	0	1.976	1	1	2	1	0	0	0		0		28	1	teaching	0	0	1	4	0	0	2	0	0	0	0	1	1	17	0	1	#NULL!	0	0	2	1	0	#NULL!	#NULL!	0	#NULL!	1	1	0	1
950	0	0	37	5	1	2.87	1	1	0	3	3	0	0		0		#NULL!	1		0	0	1	4	0	0	2	0	0	0	0	1	1	11	0	1	#NULL!	#NULL!	0	3	0	1	3	4	0	3	1	#NULL!	#NULL!	1
951	1	11	40	5	0	3.069	3	1	0	17	0	0	0		0	nnj	#NULL!	1		0	0	3	#NULL!	#NULL!	#NULL!	#NULL!	#NULL!	#NULL!	#NULL!	#NULL!	#NULL!	#NULL!	7	0	1	#NULL!	#NULL!	0	3	1	0	1	2	0	1	1	1	0	1
952	0	0	#NULL!	5	1	4	2	1	2	5	0	0	0		0		#NULL!	1		0	0	2	4	0	0	2	0	0	0	0	1	1	5	0	1	#NULL!	#NULL!	0	3	1	0	2	2	0	1	1	1	0	1
953	0	0	37	5	0	2.109	1	1	2	0	0	0	0		0		#NULL!	1		0	1	3	4	0	0	2	0	1	0	0	1	1	6	0	1	#NULL!	#NULL!	0	2	#NULL!	1	#NULL!	3	0	#NULL!	1	1	0	0
954	1	0	#NULL!	5	0	2.9	3	1	2	16	2	0	0		0		27	1		0	0	3	4	0	0	#NULL!	0	0	0	0	1	1	5	0	1	#NULL!	#NULL!	0	3	0	0	1	1	0	1	1	#NULL!	#NULL!	1
955	1	0	40	5	1	2.624	3	1	2	3	3	0	0		0		25	1		0	0	3	1	0	0	1	0	0	0	0	1	1	6	0	1	#NULL!	#NULL!	0	3	1	0	1	3	#NULL!	1	1	0	0	1
956	1	0	99	5	1	3.2	5	1	0	0	0	1	0		0		36	1		1	0	5	4	0	0	2	0	0	0	0	1	1	1	0	1	#NULL!	0	0	3	#NULL!	0	2	1	0	#NULL!	1	1	0	0
957	1	0	99	5	1	2.7	#NULL!	1	0	3	3	#NULL!	0		0		#NULL!	1		0	0	#NULL!	#NULL!	#NULL!	#NULL!	#NULL!	#NULL!	#NULL!	#NULL!	#NULL!	#NULL!	#NULL!	4	0	1	#NULL!	#NULL!	0	3	#NULL!	0	3	#NULL!	0	2	1	#NULL!	#NULL!	1
958	0	2	#NULL!	5	1	3.4	2	1	0	5	0	0	0		0		#NULL!	1		0	0	2	2	0	0	2	0	0	0	0	1	1	2	0	1	#NULL!	#NULL!	0	3	1	0	3	#NULL!	0	2	1	#NULL!	#NULL!	1
959	0	3	#NULL!	5	0	2.474	2	1	0	5	0	0	0		0		29	1		0	0	2	2	0	0	2	0	0	0	0	1	1	1	0	1	#NULL!	0	0	2	0	0	1	4	0	1	1	1	0	1
960	0	8	#NULL!	5	1	1.772	2	1	0	2	0	0	0		0		30	1		1	0	2	1	0	0	2	0	0	0	0	1	1	7	0	1	#NULL!	#NULL!	0	2	0	0	2	4	0	1	1	1	0	1
961	0	5	#NULL!	5	#NULL!	3.176	2	#NULL!	0	2	#NULL!	#NULL!	0		#NULL!		33	1		0	0	2	4	0	0	#NULL!	0	0	0	0	#NULL!	#NULL!	2	0	1	#NULL!	#NULL!	0	3	1	0	1	#NULL!	0	1	1	#NULL!	#NULL!	1
962	0	1	#NULL!	5	0	4.292	1	1	2	6	0	0	0		0		40	2		0	0	1	2	0	0	2	0	0	0	0	1	1	5	0	1	#NULL!	0	0	4	#NULL!	0	3	#NULL!	0	3	1	#NULL!	#NULL!	0
963	0	0	36	5	0	2.263	1	1	2	1	0	0	0		0		32	1		0	0	1	4	0	0	2	0	0	0	0	1	1	8	0	1	#NULL!	0	0	2	1	0	3	3	2	3	0	#NULL!	#NULL!	1
964	1	0	31	5	1	1.69	4	1	0	1	0	0	0		0	nnj	#NULL!	1		0	0	4	3	0	0	2	0	0	0	0	1	1	14	0	1	#NULL!	0	0	2	0	0	2	#NULL!	0	2	1	#NULL!	#NULL!	1
965	0	2	99	5	1	2.8	1	1	0	2	3	0	0		0		25	1		0	0	1	2	0	0	2	0	0	0	1	1	1	8	0	1	#NULL!	#NULL!	0	3	1	0	2	3	0	2	1	1	0	1
966	1	5	#NULL!	5	1	#NULL!	7	1	0	2	0	0	0		0		#NULL!	1		0	0	7	4	0	0	#NULL!	0	0	0	0	1	1	2	0	1	#NULL!	#NULL!	0	#NULL!	#NULL!	0	1	#NULL!	0	1	#NULL!	#NULL!	#NULL!	1
967	0	0	29	5	1	1.148	2	2	0	1	1	0	0		0		21	1		1	0	1	2	0	0	2	0	0	0	0	#NULL!	1	2	1	4	2	1	0	1	#NULL!	1	#NULL!	#NULL!	0	#NULL!	1	1	0	1
968	0	0	29	5	1	1.168	1	2	0	1	0	0	0		0		21	1		1	0	1	2	0	0	2	0	0	0	0	#NULL!	1	3	1	4	3	1	0	1	1	0	2	1	0	2	1	1	0	1
969	1	1	38	5	1	2.66	1	1	0	3	3	0	0		0		24	1		1	0	1	2	0	0	2	0	0	0	0	1	1	7	0	1	#NULL!	#NULL!	0	3	#NULL!	1	1	#NULL!	0	1	1	1	0	1
970	1	3	#NULL!	5	0	2.48	3	1	0	7	0	0	1	syndrome- microcephaly, ventriculomegaly, VSD	0	nnj	#NULL!	1		0	0	3	4	0	0	2	0	0	0	0	1	1	1	0	2	#NULL!	0	1	2	0	0	1	#NULL!	0	1	1	1	0	1
971	1	3	#NULL!	5	1	3.1	1	1	0	2	0	0	0		0		32	1		0	0	1	1	0	0	1	0	0	0	1	1	1	4	0	1	#NULL!	#NULL!	0	3	#NULL!	0	3	#NULL!	#NULL!	3	#NULL!	#NULL!	#NULL!	1
972	1	1	99	5	1	2.6	1	1	0	4	0	0	0		0		20	1		0	1	1	2	0	0	#NULL!	0	0	0	0	#NULL!	0	4	0	1	#NULL!	0	0	3	0	0	3	1	0	4	1	1	0	1
973	0	0	28	5	0	1.356	#NULL!	1	0	1	0	0	0		0		#NULL!	1		0	0	#NULL!	#NULL!	#NULL!	#NULL!	#NULL!	#NULL!	#NULL!	#NULL!	1	#NULL!	#NULL!	17	0	1	#NULL!	0	0	1	#NULL!	0	#NULL!	#NULL!	0	1	#NULL!	#NULL!	#NULL!	0
974	1	0	36	5	0	1.962	#NULL!	1	2	1	0	0	0		0		#NULL!	2		0	0	#NULL!	2	0	0	2	0	0	0	0	1	#NULL!	10	0	1	#NULL!	#NULL!	0	2	1	0	1	1	0	1	1	1	0	0
975	1	4	#NULL!	5	0	3.326	1	1	2	22	0	#NULL!	0	g6pd def	0		#NULL!	1		0	0	1	2	0	0	2	0	0	0	0	1	1	2	0	1	#NULL!	0	0	3	0	0	4	4	0	4	1	1	0	1
976	0	2	99	5	0	3.408	3	1	0	5	0	0	0		0		#NULL!	2		1	0	3	#NULL!	#NULL!	#NULL!	#NULL!	#NULL!	#NULL!	#NULL!	#NULL!	#NULL!	#NULL!	1	0	1	#NULL!	#NULL!	0	3	1	0	1	#NULL!	0	1	1	1	0	0
977	1	0	33	5	1	1.858	5	2	2	1	0	0	0		0	anaemia- twin twin transfusion	41	1		0	0	5	4	0	0	2	0	0	0	0	1	1	3	1	4	3	1	0	2	#NULL!	0	1	3	0	1	1	1	0	0
978	1	0	33	5	1	1.948	6	2	2	1	0	0	0		0		41	1		0	0	5	4	0	0	2	0	0	0	0	1	1	6	0	1	#NULL!	#NULL!	0	2	#NULL!	0	4	#NULL!	#NULL!	4	0	2	1	0
979	1	0	33	5	0	1.636	1	1	2	1	0	0	0		0		29	1		0	0	1	4	0	0	2	0	0	0	0	#NULL!	#NULL!	6	0	1	#NULL!	#NULL!	0	2	#NULL!	0	3	#NULL!	0	3	1	#NULL!	#NULL!	0
980	1	0	99	5	1	2.98	2	1	0	13	3	0	0		0		#NULL!	2		1	0	2	4	#NULL!	#NULL!	#NULL!	#NULL!	#NULL!	#NULL!	1	1	1	1	1	4	1	1	0	3	1	1	2	3	0	2	0	2	1	0
981	1	7	#NULL!	5	1	2.8	5	1	0	15	0	1	0		0	sepsis	#NULL!	1		1	2	5	0	0	0	3	1	#NULL!	1	1	1	0	6	1	4	13	1	0	3	0	0	#NULL!	1	#NULL!	1	1	1	0	0
982	1	0	99	5	0	2.618	2	1	2	19	0	0	0		0		34	1		0	0	2	#NULL!	#NULL!	#NULL!	#NULL!	#NULL!	#NULL!	#NULL!	#NULL!	1	#NULL!	1	0	1	#NULL!	#NULL!	0	3	1	1	#NULL!	5	0	3	1	1	0	0
983	1	0	#NULL!	5	1	3	1	1	0	3	3	0	0		0		20	1	unemployed	0	0	1	3	0	0	2	0	0	0	0	1	1	3	0	1	#NULL!	#NULL!	0	3	1	0	#NULL!	1	0	2	1	1	0	0
984	0	5	#NULL!	5	1	2	1	1	0	4	3	1	0		0	nnj	18	2		1	2	1	0	0	0	#NULL!	#NULL!	#NULL!	#NULL!	1	#NULL!	0	2	1	4	7	1	0	2	1	0	#NULL!	3	0	3	1	1	0	0
985	1	0	32	5	1	1.684	3	2	2	1	2	0	0		0		#NULL!	1		0	0	2	4	0	0	2	0	0	0	0	1	1	14	0	1	#NULL!	#NULL!	0	2	0	0	#NULL!	3	0	#NULL!	1	1	0	0
986	0	10	28	5	1	1.9	3	2	0	4	0	1	0		0		38	1	trading	0	0	3	2	0	0	2	0	0	0	0	1	1	9	0	1	#NULL!	#NULL!	0	2	1	0	#NULL!	4	0	2	1	1	0	0
987	0	7	#NULL!	5	1	2.074	2	2	0	13	0	0	0		0		20	1		1	0	1	4	0	0	#NULL!	0	0	#NULL!	0	1	1	3	0	1	#NULL!	#NULL!	0	2	1	0	#NULL!	1	0	3	1	1	0	0
988	0	4	#NULL!	5	0	3.2	1	1	2	2	0	0	0		0		30	1		0	0	1	2	0	0	2	0	0	0	0	1	1	2	0	1	#NULL!	#NULL!	0	3	1	0	#NULL!	3	0	1	1	1	0	0
989	1	2	#NULL!	5	1	3.1	1	1	0	4	3	0	0		0		25	1		1	0	1	2	0	0	2	0	0	0	0	1	1	3	0	2	#NULL!	#NULL!	0	3	0	0	#NULL!	5	0	4	1	1	0	0
990	1	0	41	5	0	3.174	2	1	0	3	3	0	0		0		34	1		0	0	2	2	0	0	2	0	0	0	0	1	1	5	0	1	#NULL!	#NULL!	0	3	0	0	#NULL!	3	0	1	1	1	0	0
991	0	1	#NULL!	5	1	2.938	#NULL!	1	2	3	3	0	0		0		#NULL!	#NULL!		#NULL!	#NULL!	#NULL!	#NULL!	#NULL!	#NULL!	#NULL!	#NULL!	#NULL!	#NULL!	#NULL!	#NULL!	#NULL!	7	0	1	#NULL!	#NULL!	0	3	0	1	#NULL!	4	0	2	1	1	0	0
992	1	5	99	5	1	2.144	1	1	2	2	1	0	0		0		32	1		0	0	1	4	0	0	2	0	0	0	0	1	1	4	0	1	#NULL!	#NULL!	0	2	0	0	#NULL!	3	0	3	1	1	0	0
993	1	0	99	5	1	2.856	1	1	2	3	3	0	0		0		38	1		0	0	1	4	0	0	#NULL!	0	0	0	0	1	1	10	0	1	#NULL!	0	0	3	#NULL!	0	3	4	0	3	1	1	0	0
994	0	1	34	5	0	1.87	2	1	2	3	3	0	0		0	nnj	#NULL!	2		0	0	2	0	0	0	3	#NULL!	#NULL!	#NULL!	0	1	1	17	0	1	#NULL!	#NULL!	0	2	#NULL!	0	1	2	0	1	1	#NULL!	#NULL!	0
995	1	2	#NULL!	5	1	1	#NULL!	1	0	4	3	0	0		0		23	1		1	0	1	2	0	0	2	0	0	#NULL!	0	1	0	6	0	1	#NULL!	0	0	0	1	0	1	#NULL!	0	1	#NULL!	#NULL!	#NULL!	0
996	1	12	99	5	1	3.3	1	1	0	4	0	0	0		0		29	2		0	0	1	3	0	0	2	#NULL!	#NULL!	#NULL!	#NULL!	1	1	8	0	1	#NULL!	#NULL!	0	3	1	0	1	#NULL!	0	1	#NULL!	#NULL!	#NULL!	0
997	0	4	99	5	0	2.738	4	1	0	2	0	0	0		0		35	1		0	1	4	2	0	0	2	0	0	0	0	1	1	2	0	1	#NULL!	0	0	3	#NULL!	0	#NULL!	#NULL!	#NULL!	#NULL!	#NULL!	#NULL!	#NULL!	0
998	1	0	38	5	1	#NULL!	4	1	0	3	3	1	0		0		30	1		1	0	4	4	0	0	2	#NULL!	0	0	0	1	1	1	1	4	1	1	0	#NULL!	1	0	1	#NULL!	0	1	#NULL!	#NULL!	#NULL!	0
999	0	17	#NULL!	5	1	4	3	1	0	4	0	0	0		0		#NULL!	1		0	0	#NULL!	4	0	0	2	0	0	0	0	1	1	4	0	1	#NULL!	#NULL!	0	3	0	0	2	3	0	2	1	#NULL!	#NULL!	0
1000	0	3	99	5	0	3.222	4	1	0	2	0	0	0		0		35	1		0	0	4	4	0	0	2	0	0	0	0	1	1	4	0	1	#NULL!	#NULL!	0	3	#NULL!	0	3	#NULL!	0	3	#NULL!	#NULL!	#NULL!	0
1001	0	7	#NULL!	5	0	3	#NULL!	1	2	2	0	0	0		0		#NULL!	1		0	#NULL!	#NULL!	4	0	0	#NULL!	0	0	0	0	1	1	6	0	1	#NULL!	#NULL!	0	3	#NULL!	0	3	#NULL!	0	3	#NULL!	#NULL!	#NULL!	0
1002	1	0	99	5	1	3.4	3	1	0	7	0	1	1	myelomeningocoele	0	sepsis	#NULL!	1		0	0	3	4	0	0	2	0	0	0	0	1	1	11	0	3	#NULL!	#NULL!	1	3	1	0	1	1	0	1	1	#NULL!	#NULL!	0
1003	1	0	#NULL!	5	1	2.66	1	1	0	3	1	0	0		0		26	1		0	0	1	4	0	0	#NULL!	0	#NULL!	#NULL!	0	1	#NULL!	2	0	1	#NULL!	#NULL!	0	3	0	0	#NULL!	3	0	2	1	1	0	0
1004	1	2	#NULL!	5	1	2.7	1	1	0	3	3	0	0		0		29	2	0	0	1	#NULL!	2	0	0	2	0	0	0	0	1	1	2	0	2	#NULL!	#NULL!	0	3	0	0	#NULL!	3	0	3	0	2	1	0
1005	0	1	38	5	1	2.02	1	2	2	3	1	0	0		0		30	2		0	#NULL!	1	4	0	0	2	0	0	0	0	1	1	2	0	1	#NULL!	#NULL!	0	2	0	0	#NULL!	#NULL!	0	2	1	1	0	1
1006	1	2	38	5	1	3.2	1	1	2	4	2	0	0		0		20	1		0	0	1	#NULL!	#NULL!	#NULL!	#NULL!	#NULL!	#NULL!	#NULL!	#NULL!	#NULL!	#NULL!	3	0	1	#NULL!	#NULL!	0	3	1	0	#NULL!	3	0	3	1	1	0	0
1007	1	0	99	5	0	2.79	1	1	0	3	3	0	0		0		21	1		0	0	1	0	#NULL!	0	3	0	0	0	#NULL!	1	0	9	0	1	#NULL!	#NULL!	0	3	1	0	#NULL!	4	0	2	1	1	0	0
1008	0	0	34	5	1	1.7	1	1	0	1	0	0	0		0		27	2		0	0	1	4	0	0	2	0	0	0	0	1	1	10	0	1	#NULL!	#NULL!	0	2	0	0	#NULL!	1	1	3	0	2	1	0
1009	0	0	99	5	1	3.082	1	1	0	3	3	0	0		0		25	1		0	0	1	2	0	0	2	0	0	0	0	1	1	6	0	1	#NULL!	#NULL!	0	3	#NULL!	0	1	3	0	1	1	1	0	1
1010	0	2	#NULL!	5	1	2.1	1	1	0	7	1	0	1	syndrome- spina bifida, CTEV and microcephaly	0		30	1		0	0	1	2	0	0	2	0	0	0	0	1	1	1	0	2	#NULL!	#NULL!	1	2	1	0	3	3	0	2	1	1	0	1
1011	0	0	38	5	0	3.798	1	1	0	3	3	0	0		0		31	1		0	0	1	4	0	0	2	0	0	0	0	1	#NULL!	5	0	1	#NULL!	#NULL!	0	3	1	0	#NULL!	3	0	3	1	1	0	1
1012	0	28	#NULL!	5	1	1.33	4	2	0	4	0	0	0		0		31	1		0	0	3	2	0	0	2	0	0	0	1	1	1	9	0	1	#NULL!	#NULL!	0	1	1	0	#NULL!	3	0	2	1	1	0	1
1013	1	21	99	5	1	2.476	5	1	0	7	0	0	1	malrotation	0		#NULL!	2		1	2	5	#NULL!	0	0	#NULL!	#NULL!	#NULL!	#NULL!	0	1	#NULL!	9	0	1	#NULL!	0	1	2	#NULL!	0	1	#NULL!	0	1	0	#NULL!	#NULL!	1
1014	1	0	#NULL!	5	1	3.02	#NULL!	1	2	3	3	0	0		0		20	1		0	0	#NULL!	#NULL!	#NULL!	#NULL!	#NULL!	#NULL!	#NULL!	#NULL!	#NULL!	#NULL!	#NULL!	6	0	1	#NULL!	#NULL!	0	3	0	0	#NULL!	3	0	3	1	1	0	1
1015	0	4	#NULL!	5	1	1.3	2	2	0	2	1	0	0		0		19	1		0	0	1	1	0	0	1	0	0	0	0	1	#NULL!	9	0	1	#NULL!	#NULL!	0	1	#NULL!	0	#NULL!	1	0	1	0	2	1	0
1016	1	6	32	5	1	2.05	3	1	0	2	0	1	0		0		#NULL!	1		0	0	3	2	0	0	2	0	0	0	1	1	1	9	0	1	#NULL!	#NULL!	0	2	#NULL!	0	#NULL!	4	0	2	1	1	0	1
1017	1	14	99	5	1	2.066	1	1	0	4	0	0	0		0		18	1	student	1	0	1	4	0	0	#NULL!	0	0	0	0	1	1	7	0	1	#NULL!	#NULL!	0	2	1	0	#NULL!	5	0	2	1	1	0	1
1018	1	1	#NULL!	5	1	#NULL!	#NULL!	1	0	4	0	0	0		0		#NULL!	1		0	0	#NULL!	#NULL!	#NULL!	#NULL!	#NULL!	#NULL!	#NULL!	#NULL!	#NULL!	#NULL!	#NULL!	9	0	1	#NULL!	#NULL!	0	#NULL!	1	0	#NULL!	4	0	4	1	1	0	1
1019	1	2	#NULL!	5	1	2.7	2	1	0	3	3	0	0		0		#NULL!	2		0	0	2	4	0	0	2	#NULL!	#NULL!	#NULL!	#NULL!	1	1	8	0	1	#NULL!	#NULL!	0	3	0	0	#NULL!	5	0	3	1	1	0	1
1020	1	0	99	5	0	2.9	2	1	0	7	0	0	1	omphalocoele	0		32	1		0	0	2	3	0	0	2	0	0	0	0	1	1	9	0	1	#NULL!	0	1	3	#NULL!	0	2	3	0	2	1	#NULL!	#NULL!	0
1021	1	3	#NULL!	5	0	3.8	1	1	2	2	0	0	0		0		40	1		0	0	2	#NULL!	#NULL!	#NULL!	#NULL!	#NULL!	#NULL!	#NULL!	#NULL!	1	#NULL!	1	0	1	#NULL!	#NULL!	0	3	1	0	#NULL!	3	0	2	1	1	0	1
1022	0	2	35	5	1	1.596	1	1	0	1	0	#NULL!	0		0		25	1	patent medicine seller	0	0	1	4	0	0	2	0	0	0	0	1	1	25	0	1	#NULL!	#NULL!	0	2	0	0	#NULL!	5	0	4	1	1	0	1
1023	1	3	99	5	1	4.2	5	1	0	4	0	0	0		0		43	1	computer operator	0	0	5	4	0	0	2	0	0	0	0	1	1	8	0	1	#NULL!	#NULL!	0	4	0	0	#NULL!	5	0	3	1	1	0	1
1024	1	6	#NULL!	5	1	2.736	1	1	0	2	0	#NULL!	0		0		21	1		0	0	1	0	0	0	#NULL!	0	0	0	1	1	0	8	0	1	#NULL!	#NULL!	0	3	1	0	#NULL!	1	0	2	1	1	0	1
1025	0	23	#NULL!	5	1	3.2	3	2	0	4	0	0	0		0		36	1		1	0	3	4	0	0	#NULL!	0	0	0	0	1	#NULL!	11	0	1	#NULL!	#NULL!	0	3	1	0	#NULL!	6	0	5	1	1	0	1
1026	0	1	#NULL!	5	1	3	3	1	0	2	0	0	0		0		25	1		0	0	3	4	0	0	2	0	0	0	0	1	1	4	0	1	#NULL!	#NULL!	0	3	#NULL!	0	#NULL!	3	0	2	1	1	0	1
1027	1	2	#NULL!	5	1	2.804	1	1	2	2	0	0	0		0		27	1		0	0	1	4	0	0	2	0	0	0	0	1	1	2	0	1	#NULL!	#NULL!	0	3	0	0	#NULL!	4	0	3	1	1	0	1
1028	1	2	99	5	1	2.968	2	1	0	3	3	#NULL!	0		0	nnj	20	2		0	3	2	4	0	0	2	0	0	0	0	1	1	8	0	1	#NULL!	#NULL!	0	3	#NULL!	0	#NULL!	4	0	#NULL!	1	1	0	1
1029	1	0	29	5	1	1.26	1	1	0	1	0	0	0		0		30	1		1	0	1	4	0	0	#NULL!	0	0	0	0	1	1	27	0	1	#NULL!	#NULL!	0	1	1	0	4	4	0	4	1	1	0	0
1030	0	5	99	5	1	2.026	1	1	0	2	0	0	0		0		20	1		0	0	1	4	0	0	2	0	0	0	0	1	1	2	0	1	#NULL!	#NULL!	0	2	1	0	3	3	#NULL!	3	1	1	0	0
1031	1	2	99	5	1	3.8	3	1	0	3	3	1	0		0		#NULL!	1		0	0	3	4	0	0	#NULL!	0	0	0	0	1	1	8	0	1	#NULL!	0	0	3	0	0	2	1	0	2	1	1	0	0
1032	1	4	#NULL!	5	0	3.144	#NULL!	1	0	4	0	0	0		0		#NULL!	1		0	1	#NULL!	#NULL!	#NULL!	#NULL!	#NULL!	#NULL!	#NULL!	#NULL!	#NULL!	#NULL!	#NULL!	2	0	1	#NULL!	#NULL!	0	3	0	0	1	3	2	1	1	1	0	0
1033	0	0	99	5	1	4.6	#NULL!	1	0	13	0	0	0		0		#NULL!	1		0	0	#NULL!	#NULL!	#NULL!	#NULL!	#NULL!	#NULL!	#NULL!	#NULL!	#NULL!	#NULL!	#NULL!	3	0	1	#NULL!	#NULL!	0	4	1	0	4	5	0	4	0	2	1	0
1034	0	0	30	5	1	1.154	#NULL!	2	0	1	#NULL!	0	0		0		#NULL!	2		0	0	#NULL!	#NULL!	#NULL!	#NULL!	#NULL!	#NULL!	#NULL!	#NULL!	#NULL!	#NULL!	#NULL!	2	1	4	2	1	0	1	1	0	3	5	0	3	1	1	0	0
1035	0	10	99	5	1	2.5	1	1	0	22	0	0	0	g6pd def	0		#NULL!	1		0	0	1	4	0	0	2	0	0	0	0	#NULL!	#NULL!	2	0	1	#NULL!	#NULL!	0	2	#NULL!	0	1	1	0	1	#NULL!	#NULL!	#NULL!	0
1036	0	1	99	5	1	2.594	1	1	0	9	0	0	0		0		29	1		0	0	1	1	0	0	1	0	0	0	0	1	1	5	0	1	#NULL!	#NULL!	0	3	1	0	#NULL!	2	0	#NULL!	1	1	0	0
1037	0	1	99	5	0	3.204	1	1	0	2	0	0	0		0		#NULL!	1		0	0	1	4	0	0	2	0	0	0	0	1	1	1	0	2	#NULL!	#NULL!	0	3	#NULL!	0	#NULL!	6	0	3	1	1	0	1
1038	1	0	99	5	0	2.3	1	1	2	5	0	0	0		0		28	2		0	0	1	4	0	0	#NULL!	0	0	0	0	1	1	2	0	1	#NULL!	#NULL!	0	2	1	0	2	3	0	2	0	2	1	0
1039	0	1	99	5	0	3.186	1	1	2	22	0	0	0	g6pd def	0		30	1		0	0	1	4	0	0	2	0	0	0	0	1	1	2	0	1	#NULL!	#NULL!	0	3	1	0	2	#NULL!	#NULL!	2	1	1	0	0
1040	1	2	#NULL!	5	1	2.289	2	#NULL!	0	4	3	0	0		0		23	1		0	0	2	3	0	0	2	0	0	0	0	1	1	7	1	4	9	1	0	2	0	0	#NULL!	3	0	2	1	1	0	0
1041	1	1	#NULL!	5	0	3.008	3	1	0	22	0	0	0	g6pd def	0		#NULL!	1		0	0	3	4	0	0	2	0	0	0	0	1	1	4	0	1	#NULL!	#NULL!	0	3	#NULL!	0	#NULL!	#NULL!	0	#NULL!	#NULL!	#NULL!	#NULL!	0
1042	1	7	#NULL!	5	1	2	2	1	0	7	0	1	1	intestinal atresia	0	sepsis	25	1	trading	1	0	2	4	0	0	#NULL!	0	0	0	0	1	0	1	1	4	7	1	1	2	1	0	4	4	0	5	1	#NULL!	#NULL!	0
1043	1	8	#NULL!	5	0	#NULL!	#NULL!	1	0	2	0	0	0		0		#NULL!	#NULL!		#NULL!	#NULL!	#NULL!	#NULL!	#NULL!	#NULL!	#NULL!	#NULL!	#NULL!	#NULL!	#NULL!	#NULL!	#NULL!	3	0	1	#NULL!	#NULL!	0	#NULL!	0	0	2	5	0	2	1	1	0	0
1044	0	0	#NULL!	5	1	1.85	4	2	0	1	3	0	0		0	nnj	#NULL!	1		1	0	3	4	0	0	#NULL!	0	0	#NULL!	0	1	1	19	0	1	#NULL!	#NULL!	0	2	0	0	2	#NULL!	0	2	1	1	0	1
1045	0	0	#NULL!	5	1	1.8	3	2	0	1	3	0	0		0	nnj	#NULL!	1		1	0	3	4	0	0	#NULL!	0	0	#NULL!	0	1	1	19	0	1	#NULL!	0	0	2	#NULL!	0	#NULL!	4	0	2	1	1	0	1
1046	1	0	#NULL!	5	1	3.122	4	1	0	3	3	0	0		0		30	1		0	0	4	4	0	0	#NULL!	0	0	0	0	1	1	6	0	1	#NULL!	#NULL!	0	3	1	0	#NULL!	3	0	1	1	1	0	1
1047	0	2	99	5	0	2.478	2	1	0	2	0	0	0		0		#NULL!	1		0	0	2	4	0	0	2	0	0	#NULL!	#NULL!	1	1	2	0	1	#NULL!	#NULL!	0	2	#NULL!	0	4	5	0	4	1	1	0	1
1048	0	0	39	5	0	3.784	1	1	0	10	0	0	0		0		#NULL!	2		0	0	1	4	0	0	2	0	0	0	0	1	1	2	0	1	#NULL!	0	0	3	0	0	1	#NULL!	0	1	0	#NULL!	#NULL!	1
1049	1	3	99	5	0	2.7	4	1	2	2	0	0	0		0		33	1		0	0	4	4	0	0	2	0	0	0	0	1	1	1	0	1	#NULL!	#NULL!	0	3	0	0	3	#NULL!	0	3	#NULL!	#NULL!	#NULL!	1
1050	0	0	33	5	1	2.14	1	1	0	1	3	#NULL!	0		0		21	1	trading	1	0	1	4	0	0	#NULL!	0	0	0	0	1	1	1	1	4	1	1	0	2	0	0	1	1	0	1	1	#NULL!	#NULL!	1
1051	0	1	32	5	1	1.7	3	2	0	1	#NULL!	#NULL!	0		#NULL!		28	1	trading	0	0	2	4	0	0	2	0	0	0	0	1	1	8	0	1	#NULL!	#NULL!	0	2	#NULL!	0	1	3	0	1	1	#NULL!	#NULL!	1
1052	1	0	#NULL!	5	0	2.86	1	1	0	3	3	0	0		0		#NULL!	1		0	0	1	0	0	0	#NULL!	#NULL!	#NULL!	#NULL!	0	1	0	5	0	1	#NULL!	#NULL!	0	3	#NULL!	0	#NULL!	#NULL!	0	#NULL!	#NULL!	#NULL!	#NULL!	1
1053	0	7	#NULL!	5	1	3	2	1	0	7	0	0	1	ARM, ileal atresia	0		28	1	trading	0	0	2	4	0	0	#NULL!	#NULL!	#NULL!	#NULL!	0	1	1	27	1	4	34	1	1	3	#NULL!	1	4	4	#NULL!	6	1	1	0	0
1054	0	5	#NULL!	4	1	#NULL!	1	1	0	4	1	0	0		0		22	1		0	0	1	#NULL!	#NULL!	#NULL!	#NULL!	#NULL!	#NULL!	#NULL!	#NULL!	#NULL!	#NULL!	1	1	4	5	1	0	#NULL!	0	0	1	3	2	1	1	#NULL!	#NULL!	0
1055	1	1	36	4	1	0.7	2	1	0	1	0	0	0		0		#NULL!	1		0	#NULL!	2	4	0	0	2	0	0	0	0	1	#NULL!	2	1	4	3	1	0	0	#NULL!	0	2	4	0	2	1	1	0	1
1056	1	6	#NULL!	4	1	#NULL!	#NULL!	1	0	4	0	0	0		0		#NULL!	1		0	0	#NULL!	#NULL!	#NULL!	#NULL!	#NULL!	#NULL!	#NULL!	#NULL!	#NULL!	#NULL!	#NULL!	2	1	4	7	1	0	#NULL!	#NULL!	0	1	4	0	1	1	1	0	1
1057	1	0	24	5	0	0.63	5	1	0	1	3	0	0		0		35	1		0	0	5	2	0	0	#NULL!	0	0	0	0	1	0	3	1	4	3	1	0	0	0	0	#NULL!	4	0	3	1	#NULL!	#NULL!	1
1058	1	9	#NULL!	5	1	#NULL!	7	2	0	2	3	#NULL!	0		0		35	#NULL!		#NULL!	#NULL!	7	1	0	0	2	0	0	0	0	1	1	1	1	4	9	1	0	#NULL!	1	0	2	4	0	2	1	1	0	1
[truncated: 16 more columns]
